# Supplementary material for: Whole genome resequencing in tomato reveals variation associated with introgression and breeding events
Source: PubMed Central journal article supplement (PMC4046683; doi:10.1186/1471-2164-14-791), 2013-11-14

Genes

SL2.40ch01

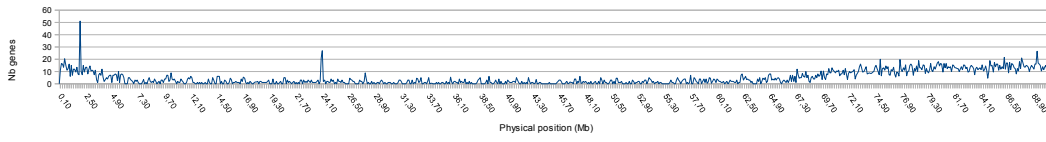

Homozygous SNP

SL2.40ch01

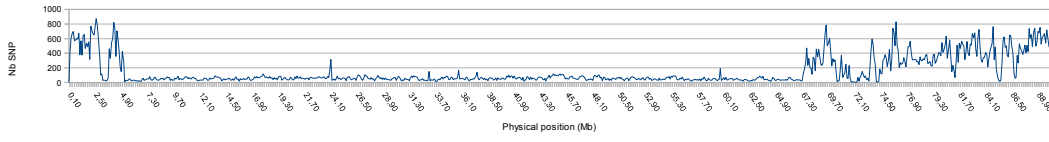

Heterozygous SNP

SL2.40ch01

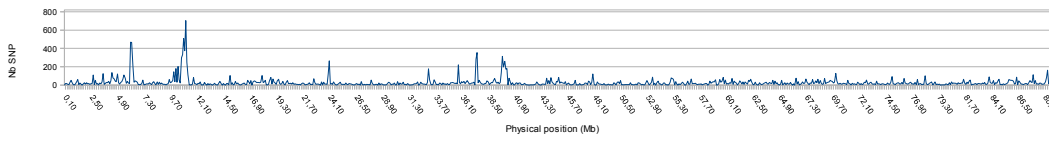

Homozygous InDel

SL2.40ch01

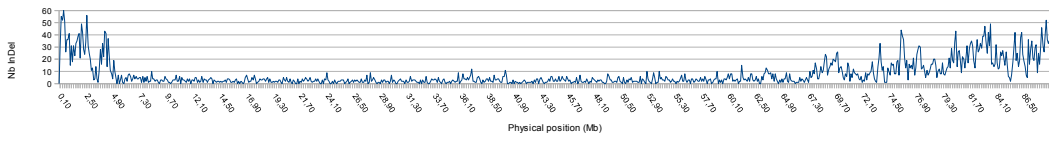

Cervil - Homozygous SNP

SL2.40ch01

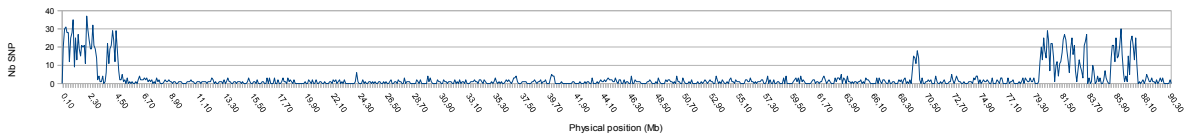

Criollo\_new - Homozygous SNP

SL2.40ch01

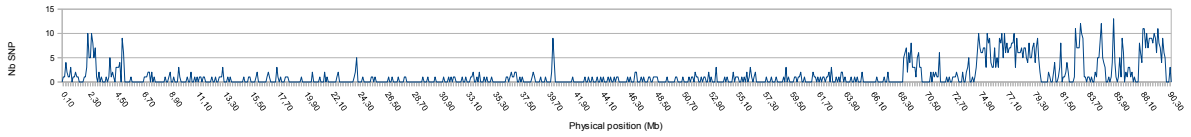

Ferum\_new - Homozygous SNP

SL2.40ch01

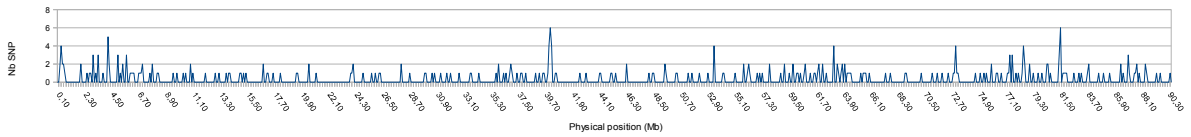

LA0147 - Homozygous SNP

SL2.40ch01

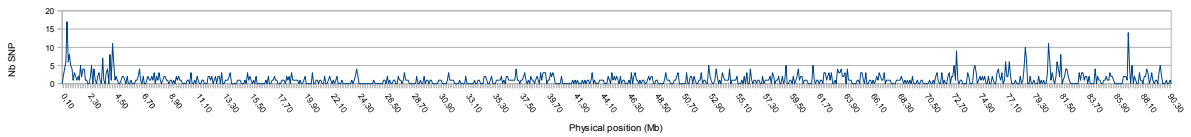

LA1420 - Homozygous SNP

SL2.40ch01

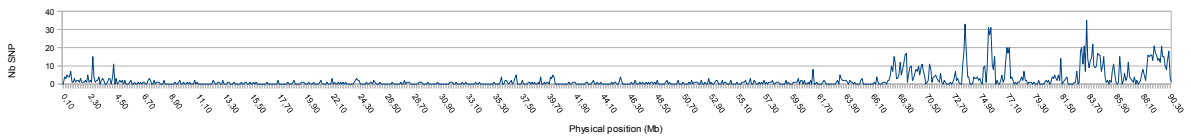

Levovil - Homozygous SNP

SL2.40ch01

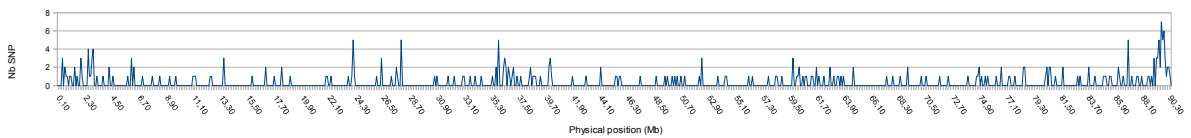

Plovdiv - Homozygous SNP

SL2.40ch01

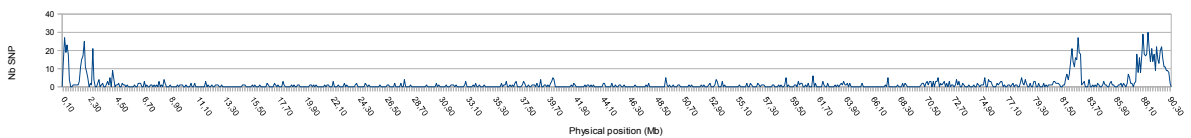

Stupicte - Homozygous SNP

SL2.40ch01

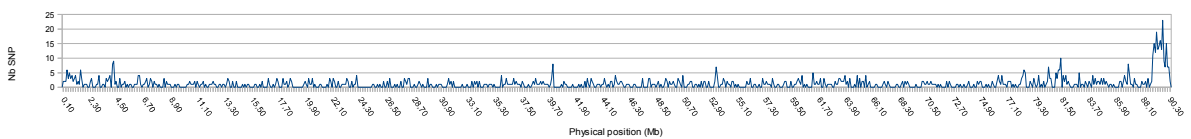

SNP hnz

Cervil - Homozygous SNP

SL2.40ch01

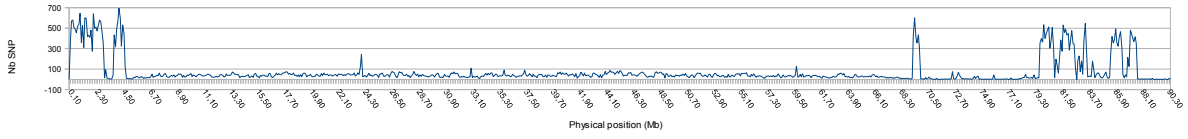

Criollo\_new - Homozygous SNP

SL2.40ch01

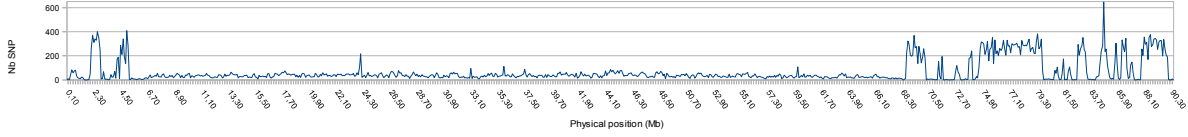

Ferum\_new - Homozygous SNP

SL2.40ch01

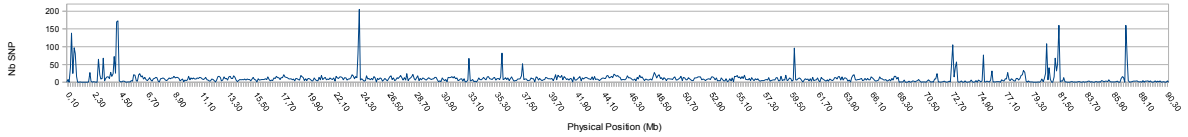

LA0147 - Homozygous SNP

SL2.40ch01

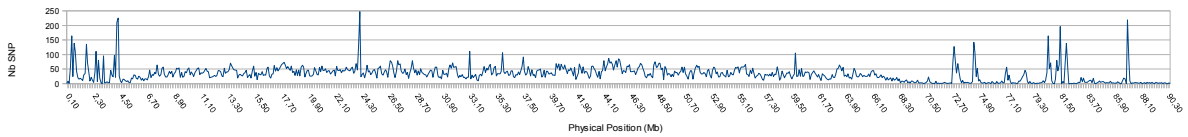

LA1420 - Homozygous SNP

SL2.40ch01

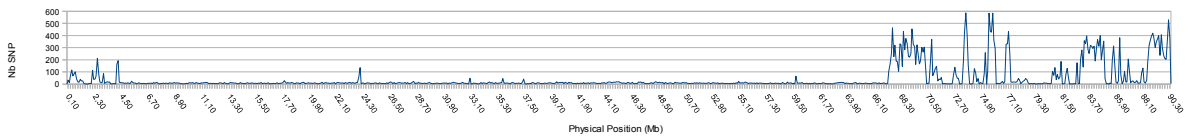

Levovil - Homozygous SNP

SL2.40ch01

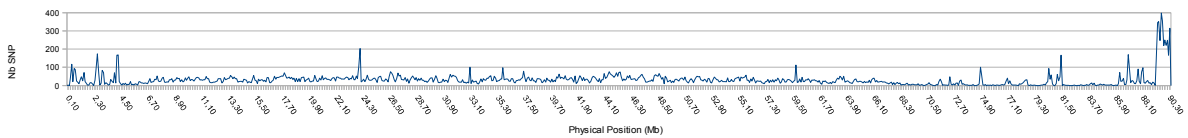

Plodiv - Homozygous SNP

SL2.40ch01

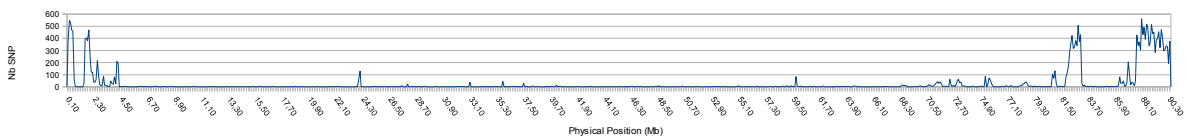

Stupicke - Homozygous SNP

SL2.40ch01

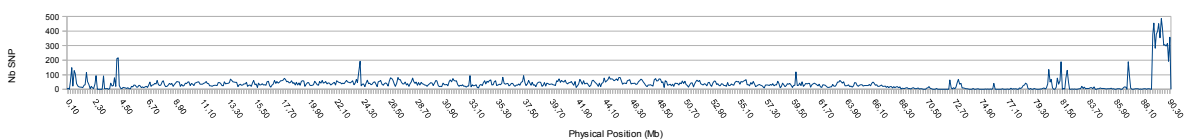

SNP htz

Cervil - Heterozygous SNP

SL2.40ch01

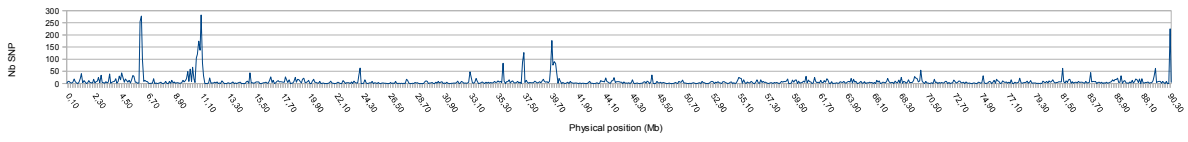

Criollo\_new - Heterozygous SNP

SL2.40ch01

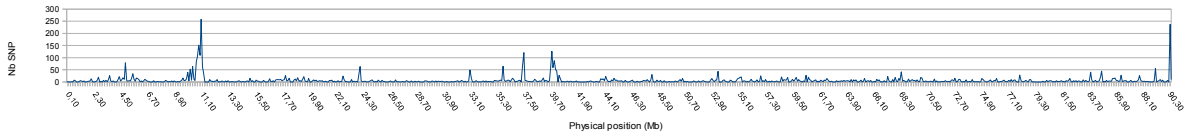

Ferum\_new - Heterozygous SNP

SL2.40ch01

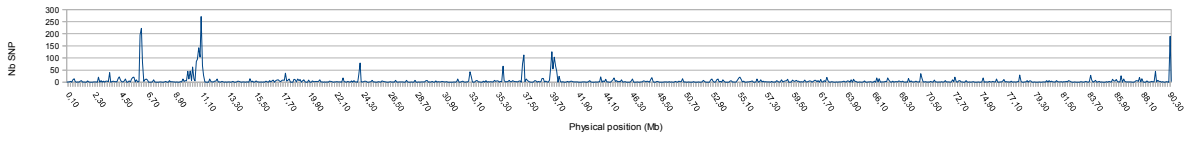

LA0147 - Heterozygous SNP

SL2.40ch01

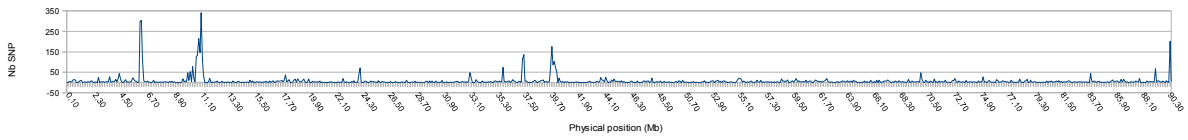

LA1420 - Heterozygous SNP

SL2.40ch01

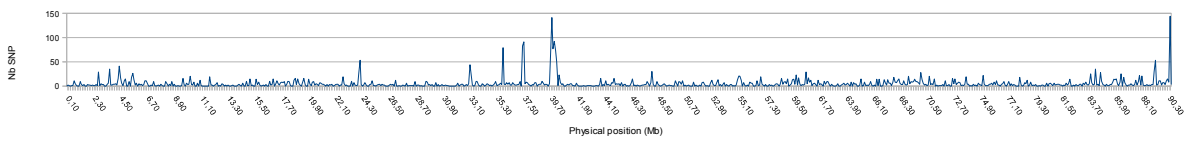

Levovil - Heterozygous SNP

SL2.40ch01

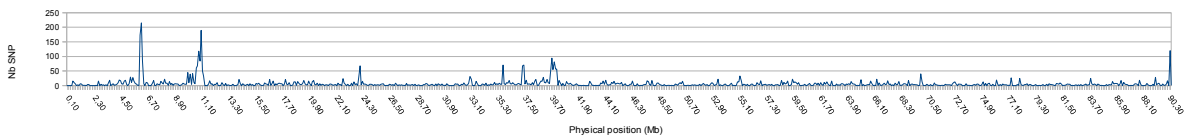

Plovdiv - Heterozygous SNP

SL2.40ch01

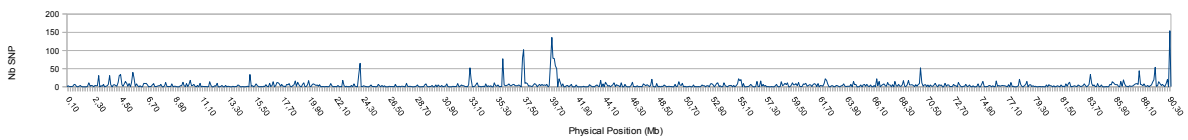

Stupicke - Heterozygous SNP

SL2.40ch01

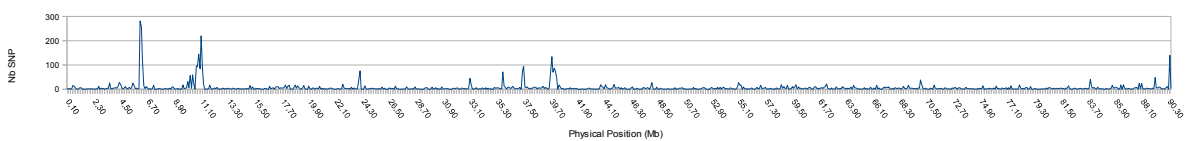



Genes

SL2.40ch02

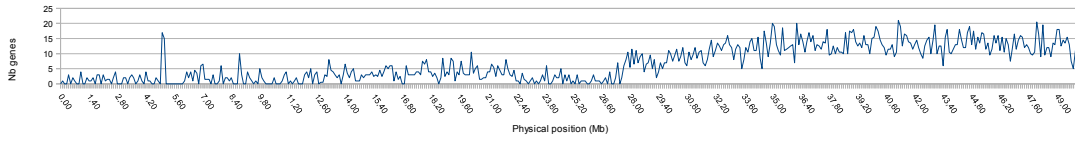

Homozygous SNP

SL2.40ch02

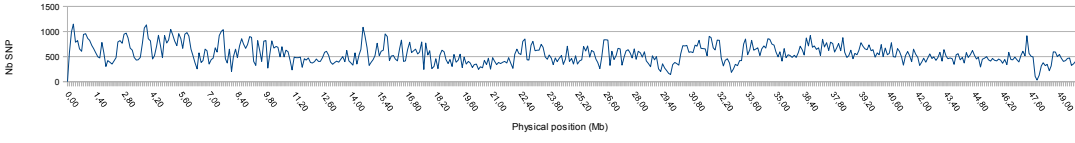

Heterozygous SNP

SL2.40ch02

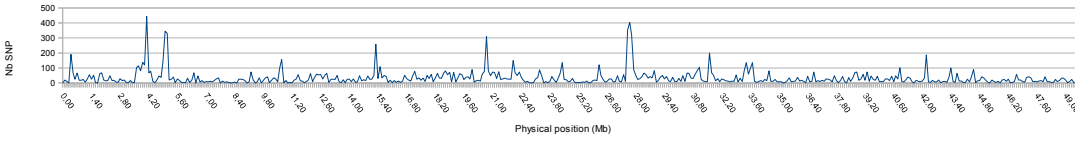

Homozygous InDel

SL2.40ch02

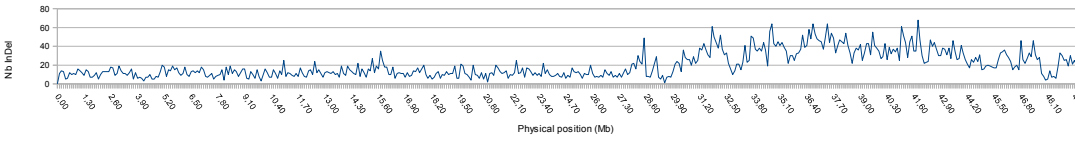

Cervil - Homozygous InDel

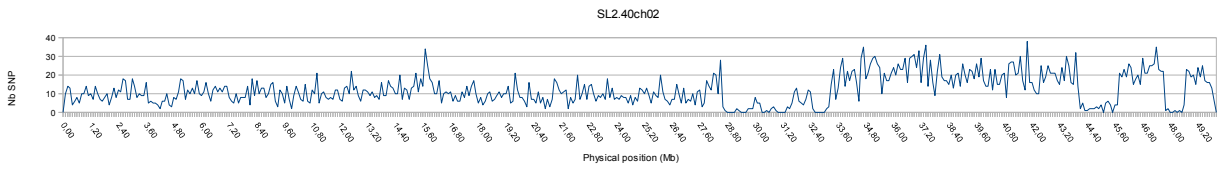

Criollo\_new - Homozygous InDel

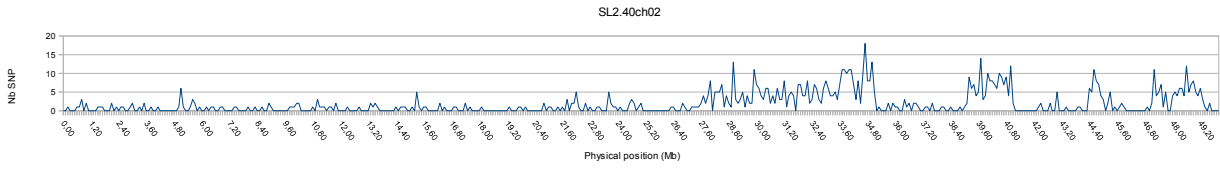

Ferum\_new - Homozygous InDel

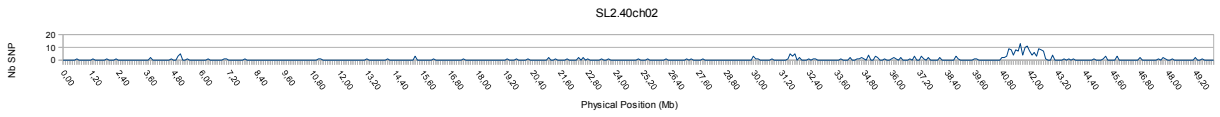

LA0147 - Homozygous InDel

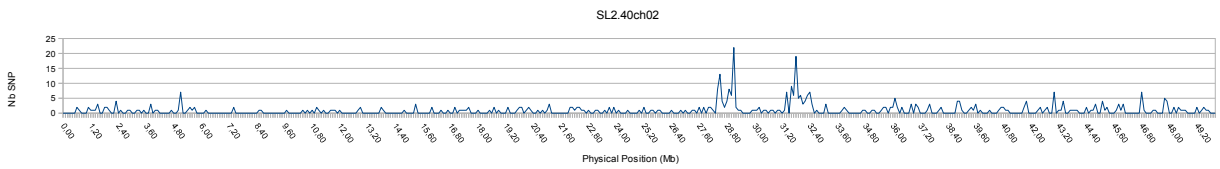

LA1420 - Homozygous InDel

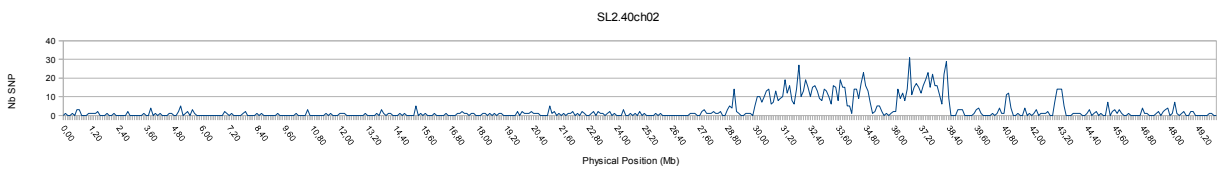

Levovil - Homozygous InDel

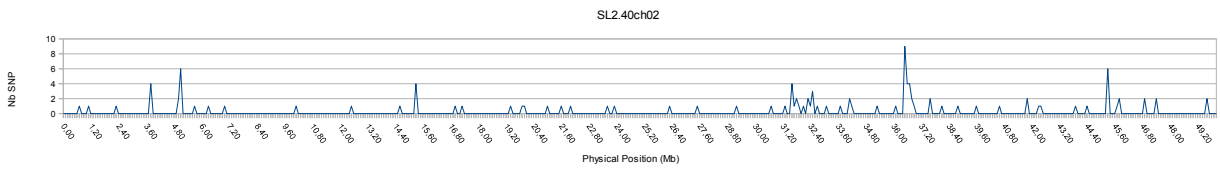

Plodiv - Homozygous InDel

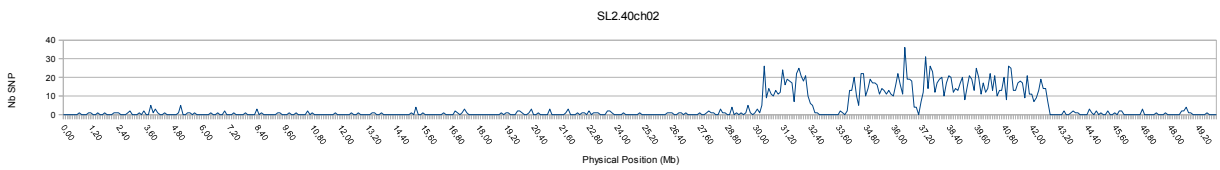

Stupicke - Homozygous InDel

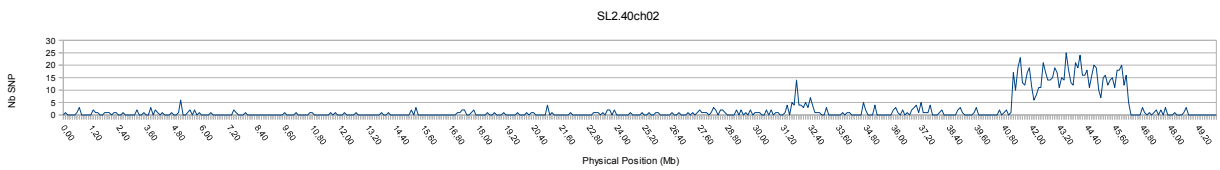

Cervil - Homozygous SNP

SL2.40ch02

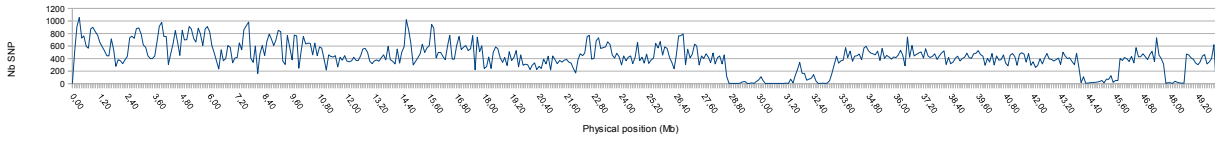

Criollo\_new - Homozygous SNP

SL2.40ch02

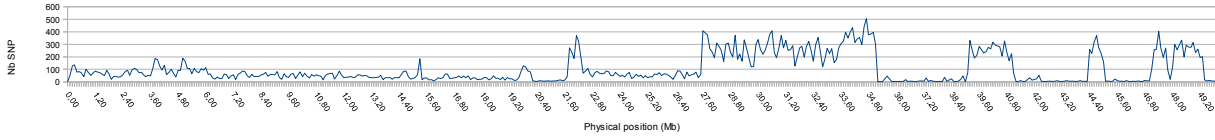

Ferum\_new - Homozygous SNP

SL2.40ch02

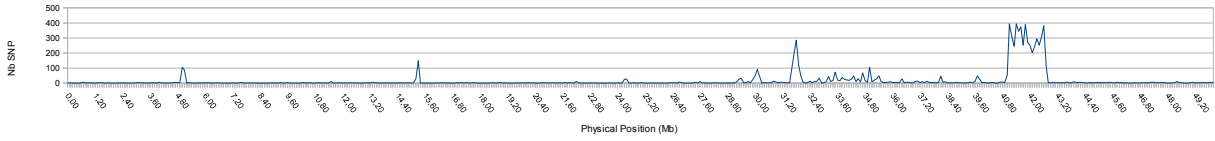

LA0147 - Homozygous SNP

SL2.40ch02

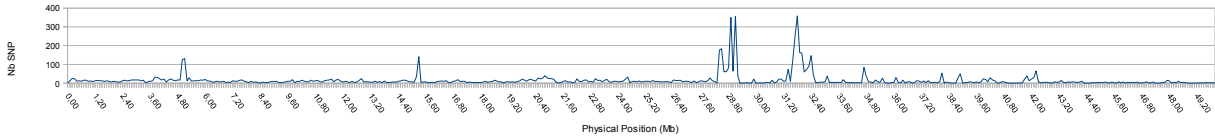

LA1420 - Homozygous SNP

SL2.40ch02

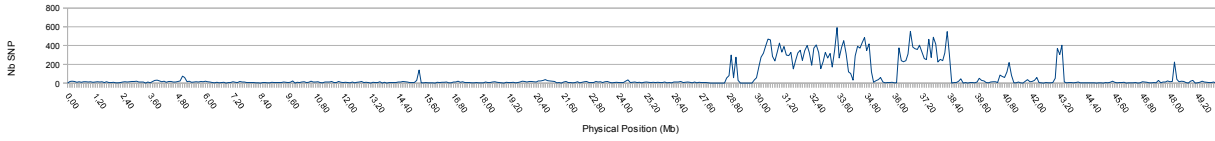

Levovl - Homozygous SNP

SL2.40ch02

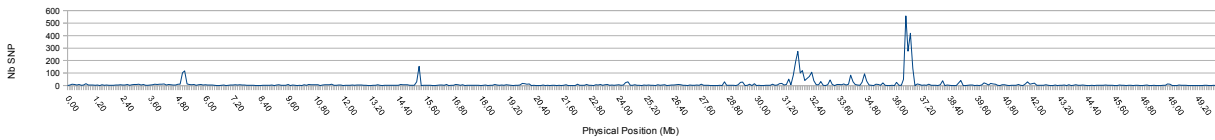

Plodiv - Homozygous SNP

SL2.40ch02

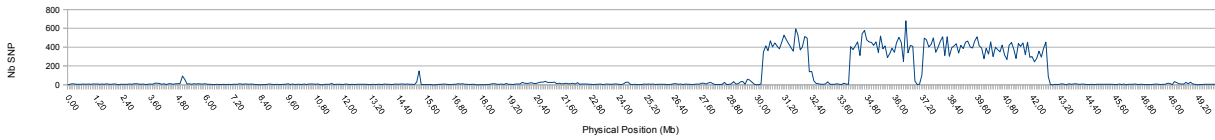

Stupicke - Homozygous SNP

SL2.40ch02

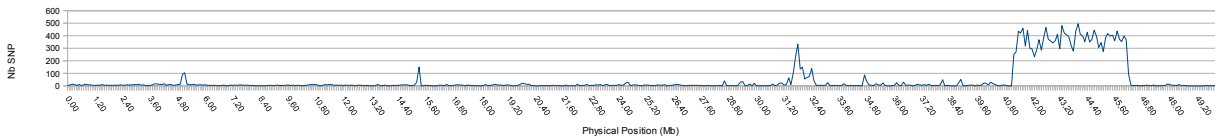

SNP htz

Cervil - Heterozygous SNP

SL2.40ch02

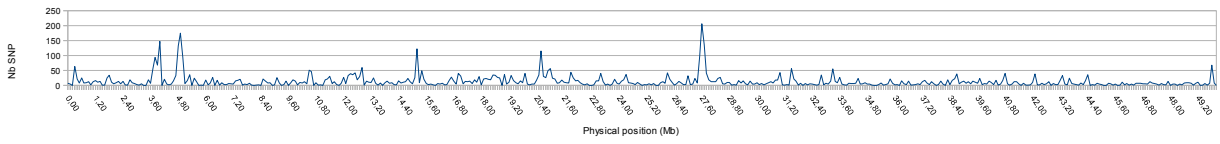

Criollo\_new - Heterozygous SNP

SL2.40ch02

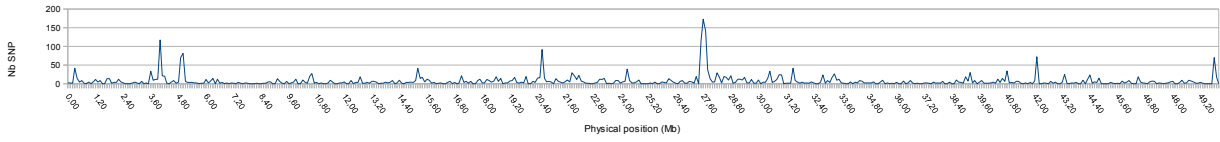

Ferum\_new - Heterozygous SNP

SL2.40ch02

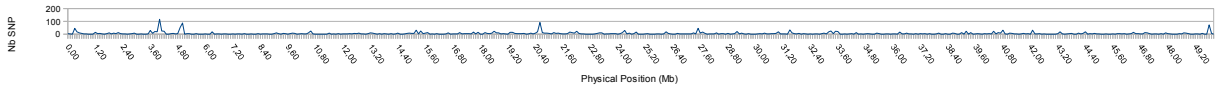

LA0147 - Heterozygous SNP

SL2.40ch02

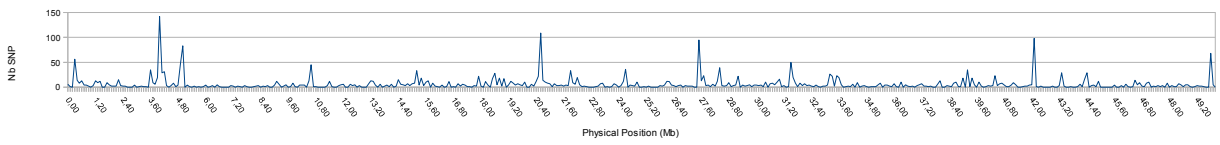

LA1420 - Heterozygous SNP

SL2.40ch02

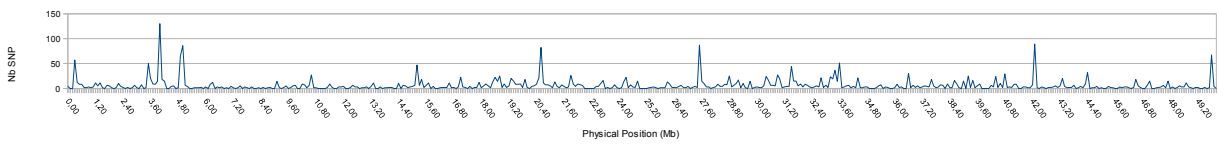

Lewovil - Heterozygous SNP

SL2.40ch02

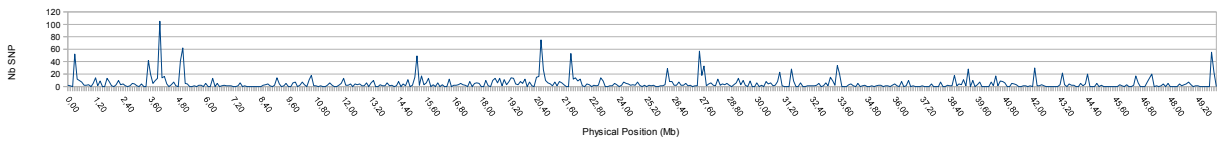

Plovdiv - Heterozygous SNP

SL2.40ch02

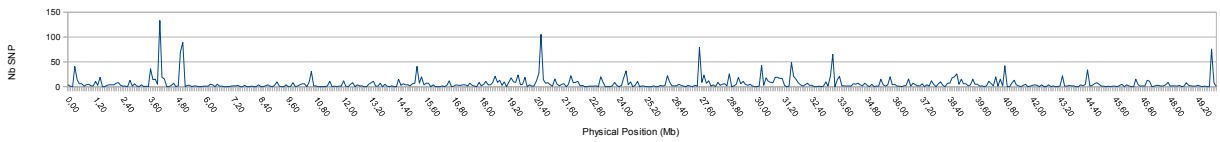

Stupicte - Heterozygous SNP

SL2.40ch02

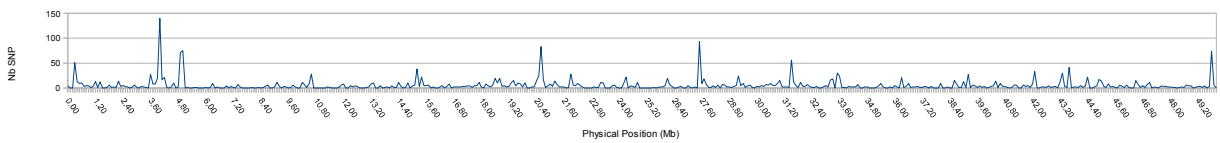

Genes

SL2.40ch03

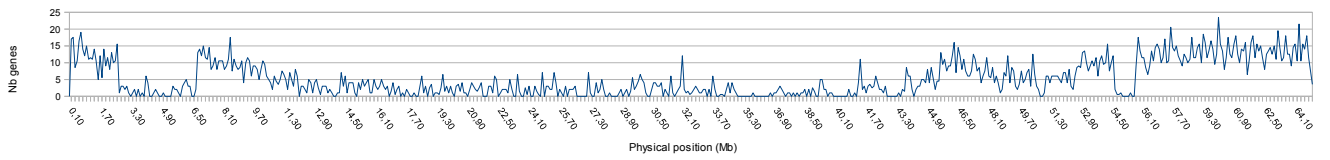

Homozygous SNP

SL2.40ch03

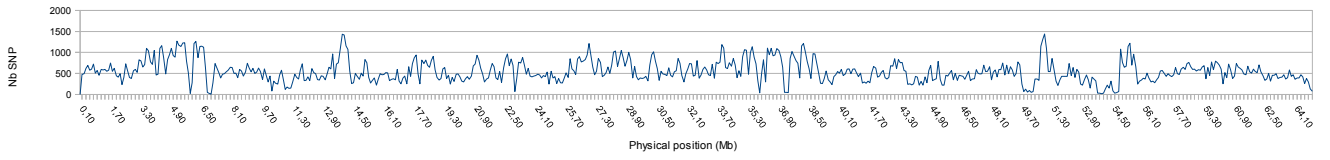

Heterozygous SNP

SL2.40ch03

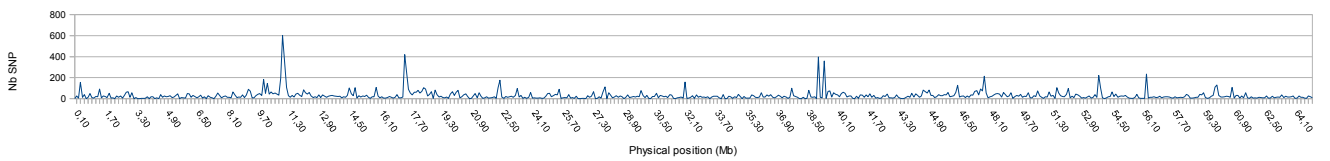

Homozygous InDel

SL2.40ch03

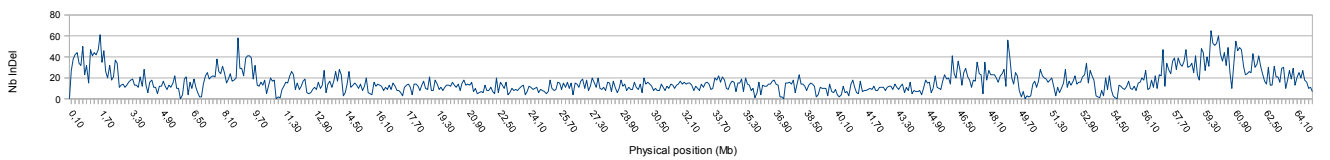

Cervil - Homozygous InDel

SL2.40ch03

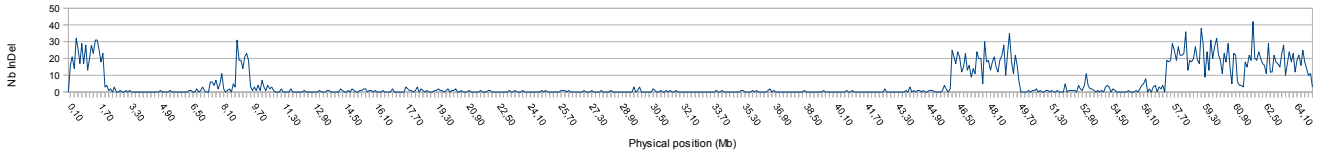

Criollo\_new - Homozygous InDel

SL2.40ch03

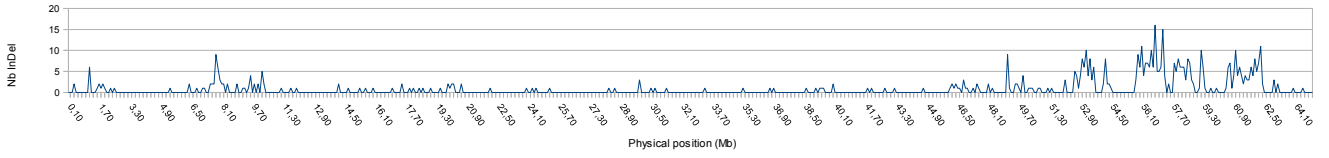

Ferum\_new - Homozygous InDel

SL2.40ch03

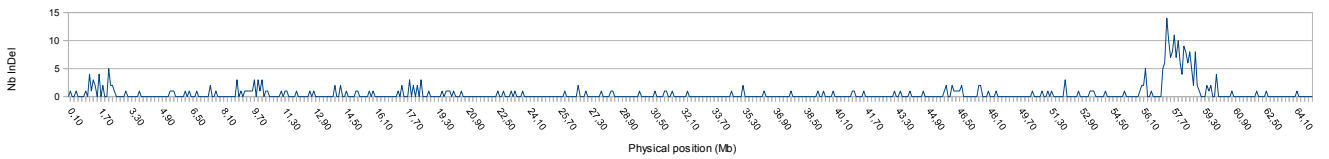

LA0147 - Homozygous InDel

SL2.40ch03

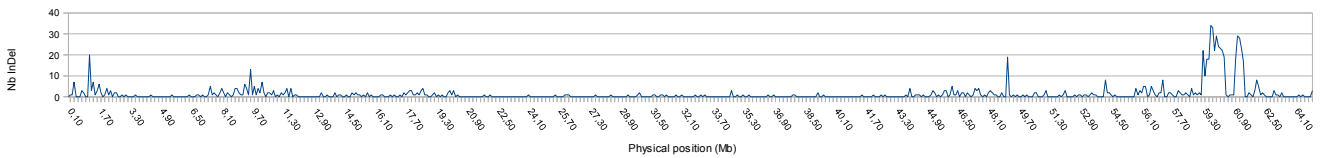

LA1420 - Homozygous InDel

SL2.40ch03

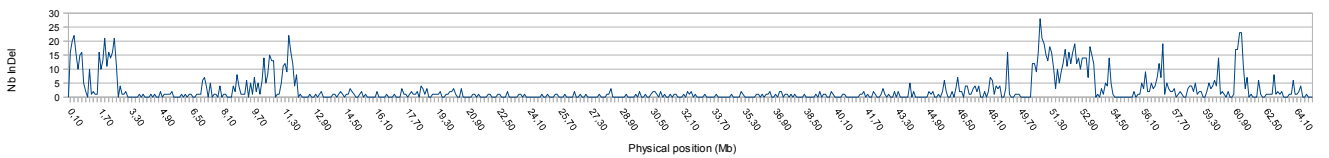

Levovil - Homozygous InDel

SL2.40ch03

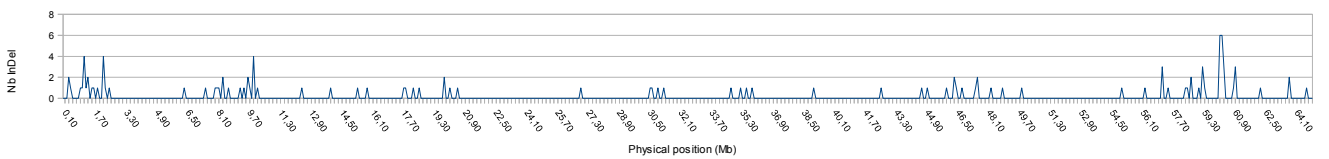

Plovdiv - Homozygous InDel

SL2.40ch03

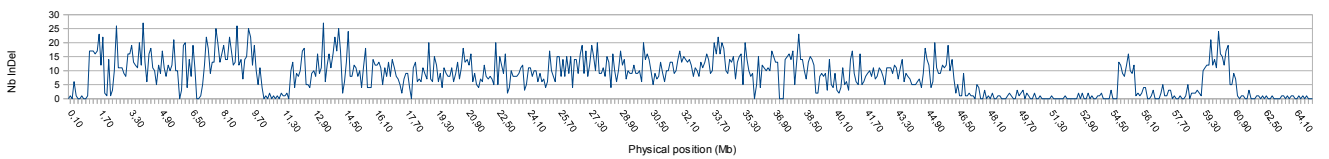

Stupicke - Homozygous InDel

SL2.40ch03

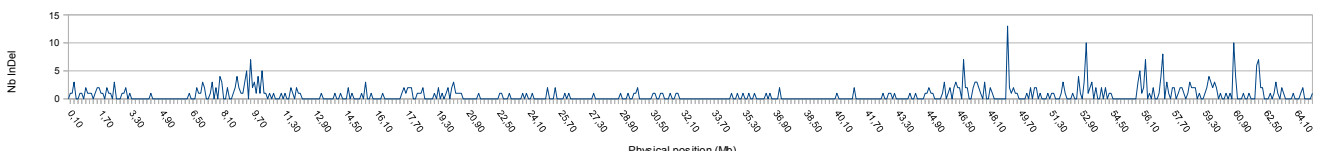

Cervil - Homozygous SNP

SL2.40ch03

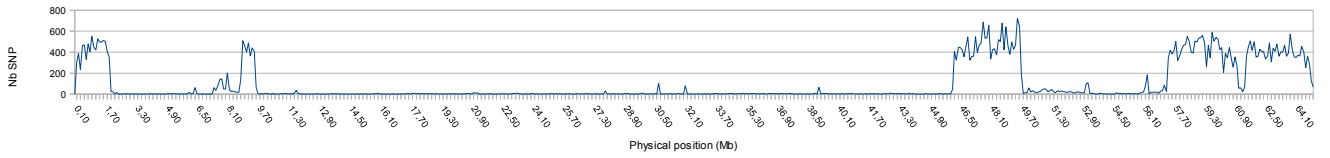

Criollo\_new - Homozygous SNP

SL2.40ch03

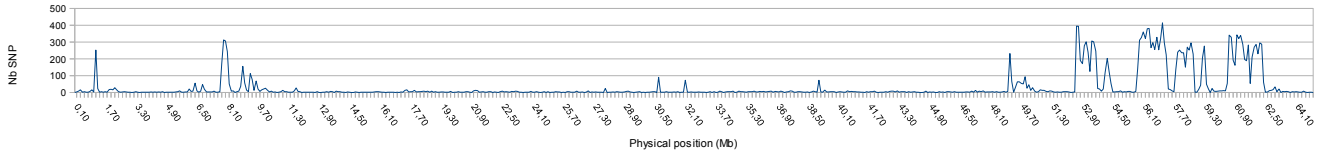

Ferum\_new - Homozygous SNP

SL2.40ch03

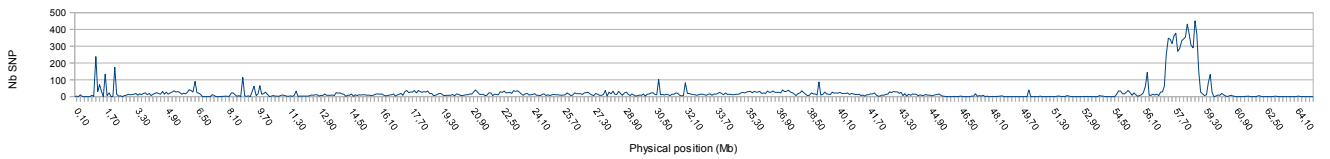

LA0147 - Homozygous SNP

SL2.40ch03

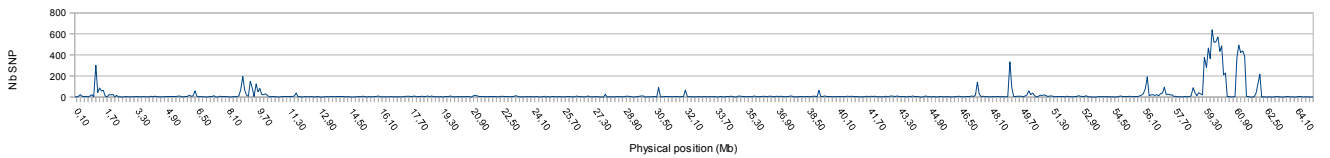

LA1420 - Homozygous SNP

SL2.40ch03

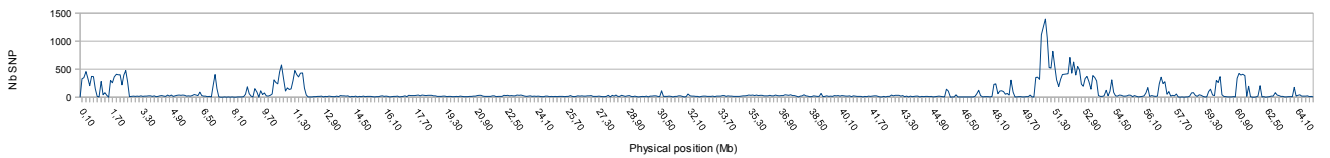

Levovil - Homozygous SNP

SL2.40ch03

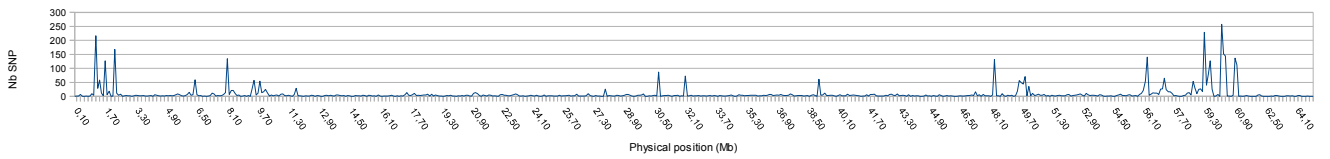

Plovdiv - Homozygous SNP

SL2.40ch03

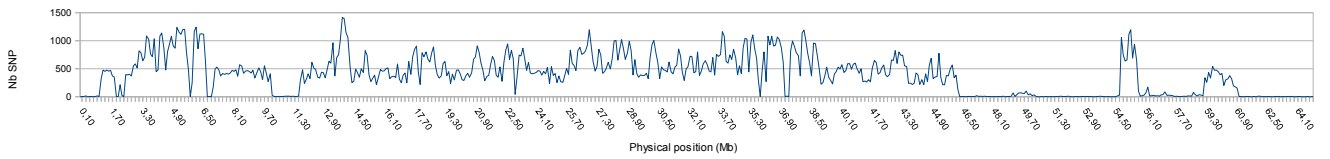

Stupicke - Homozygous SNP

SL2.40ch03

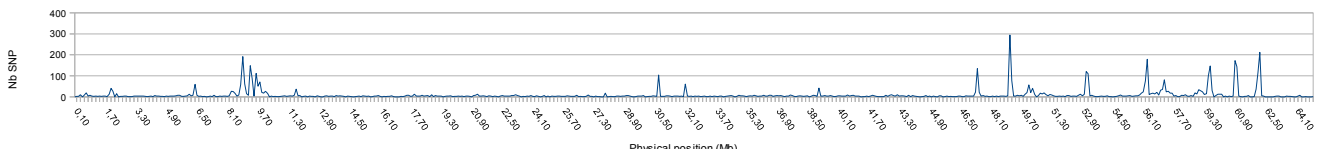

Cervil - Heterozygous SNP

SL2.40ch03

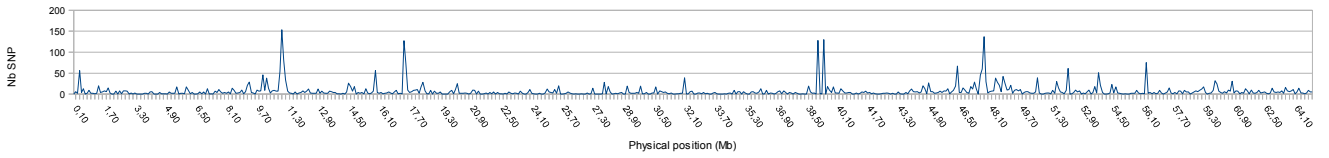

Criollo\_new - Heterozygous SNP

SL2.40ch03

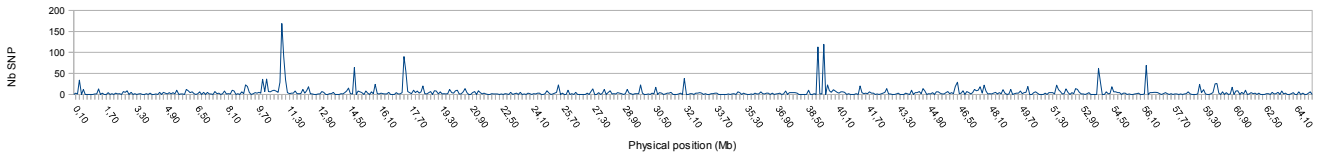

Ferum\_new - Heterozygous SNP

SL2.40ch03

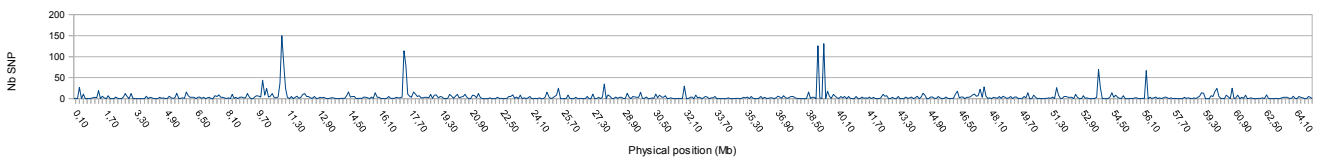

LA0147 - Heterozygous SNP

SL2.40ch03

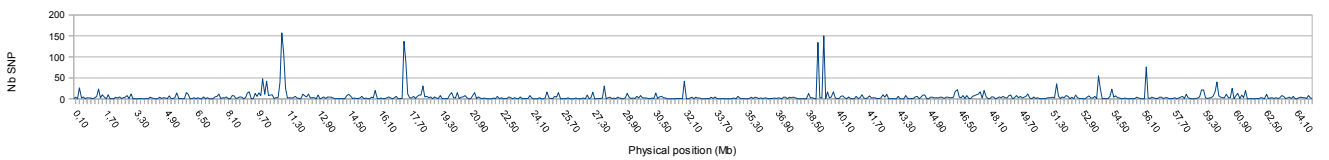

LA1420 - Heterozygous SNP

SL2.40ch03

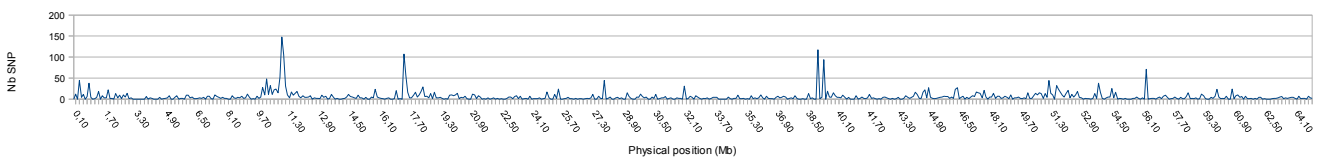

Levovil - Heterozygous SNP

SL2.40ch03

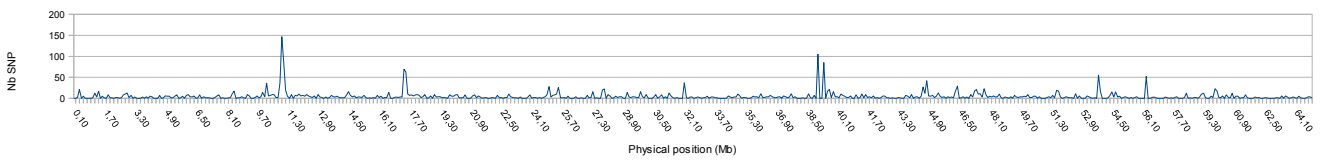

Plovdiv - Heterozygous SNP

SL2.40ch03

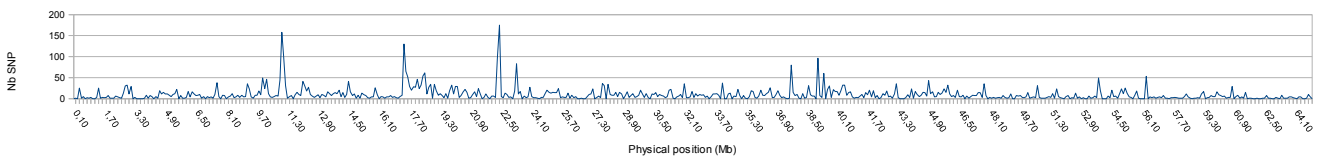

Stupicke - Heterozygous SNP

SL2.40ch03

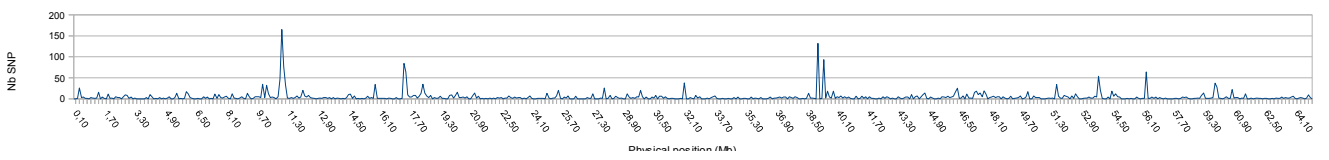



Genes

SL2.40ch04

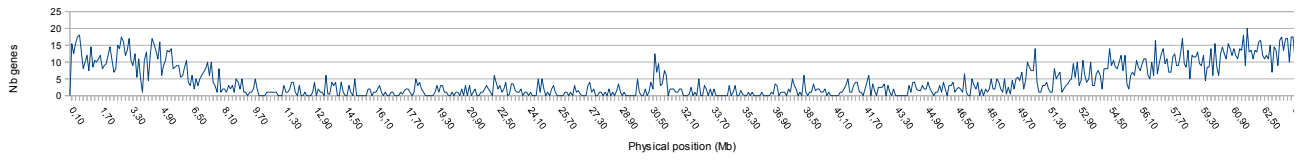

Homozygous SNP

SL2.40ch04

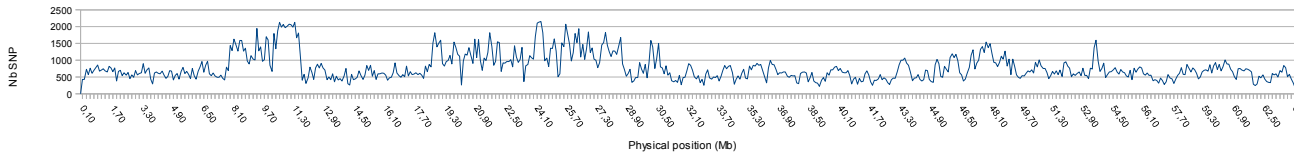

Heterozygous SNP

SL2.40ch04

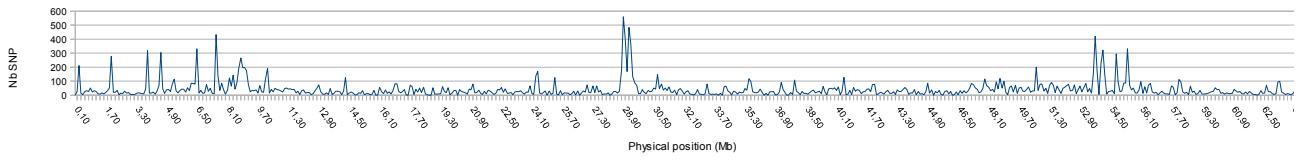

Homozygous InDel

SL2.40ch04

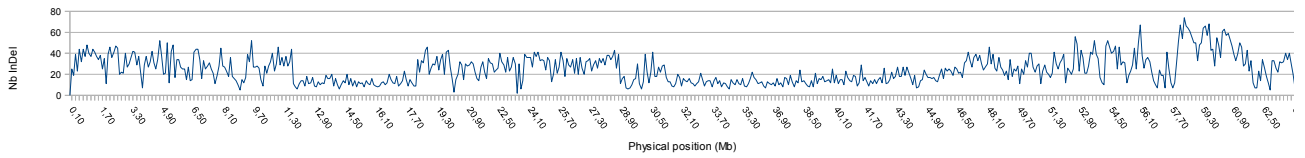



64 kb



64 kb



64 kb



64 kb

InDel hmz

Cervil - Homozygous InDel

SL2.40ch04

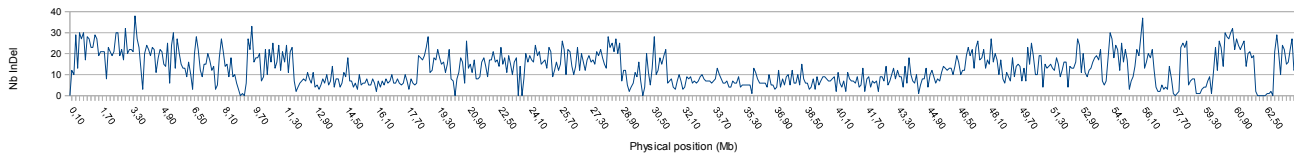

Criollo\_new - Homozygous InDel

SL2.40ch04

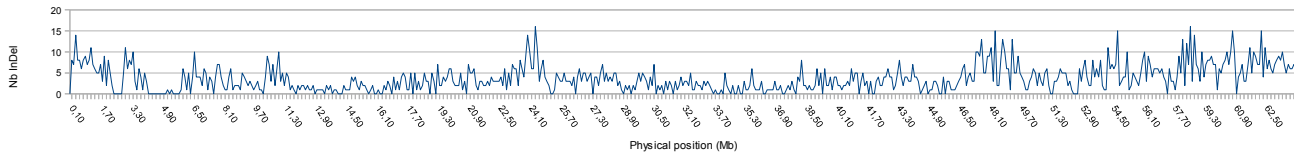

Ferum\_new - Homozygous InDel

SL2.40ch04

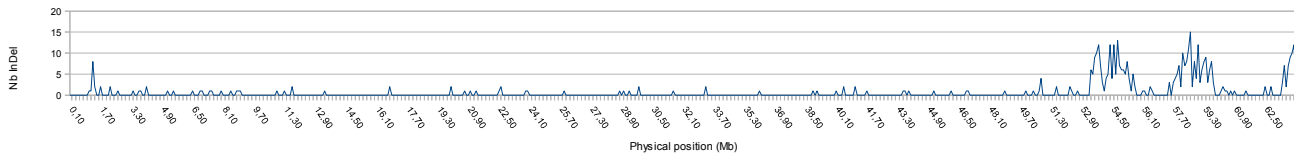

LA0147 - Homozygous InDel

SL2.40ch04

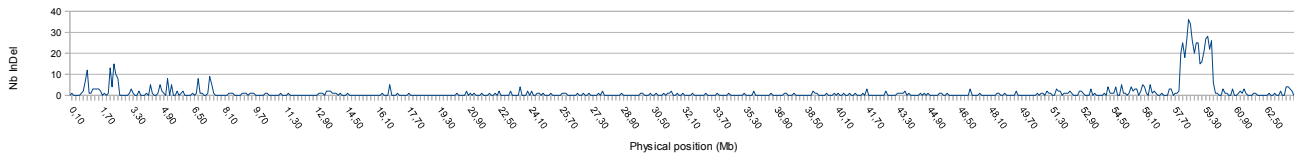

LA1420 - Homozygous InDel

SL2.40ch04

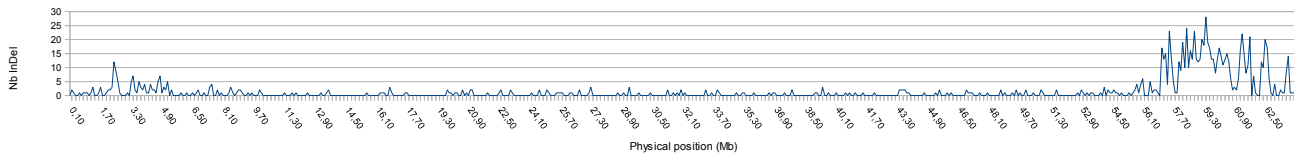

Levovil - Homozygous InDel

SL2.40ch04

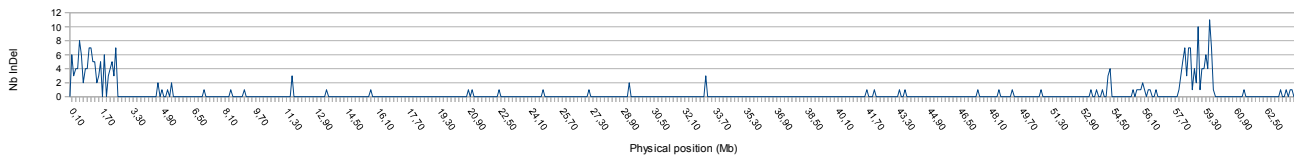

Plovdiv - Homozygous InDel

SL2.40ch04

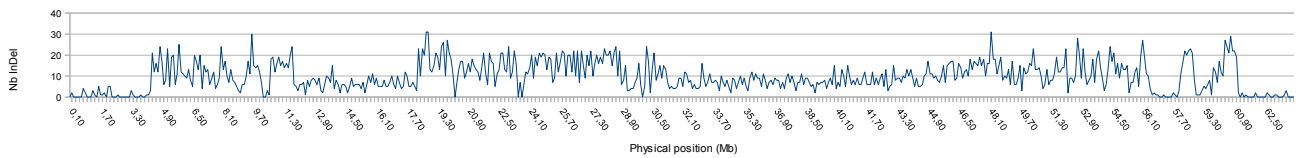

Stupicke - Homozygous InDel

SL2.40ch04

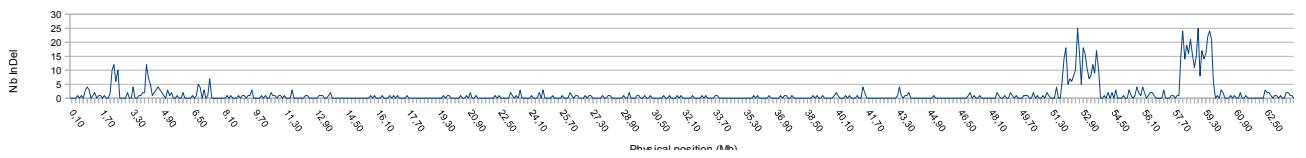

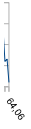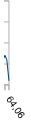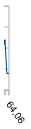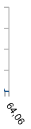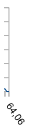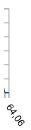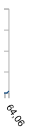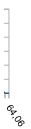

Cervil - Homozygous SNP

SL2.40ch04

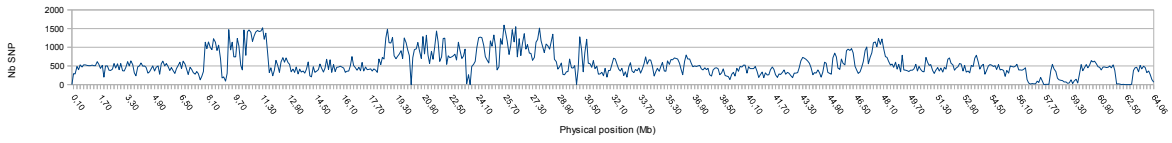

Criollo\_new - Homozygous SNP

SL2.40ch04

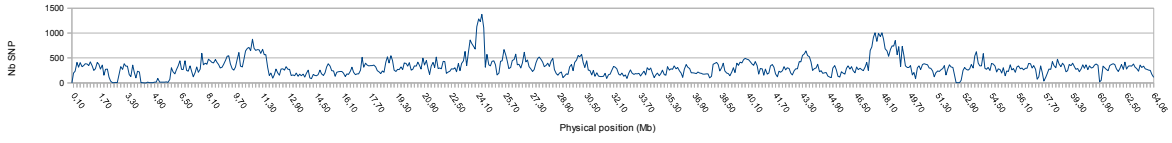

Ferum\_new - Homozygous SNP

SL2.40ch04

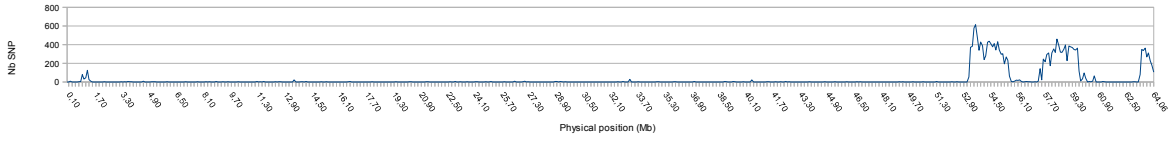

LA0147 - Homozygous SNP

SL2.40ch04

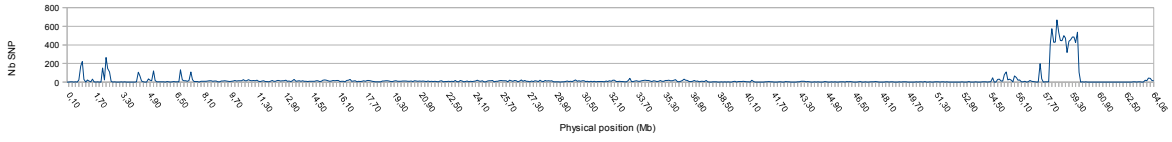

LA1420 - Homozygous SNP

SL2.40ch04

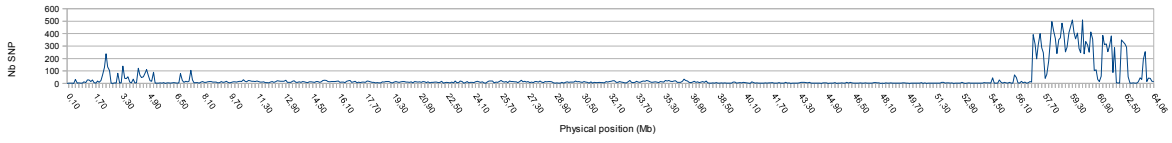

Levovil - Homozygous SNP

SL2.40ch04

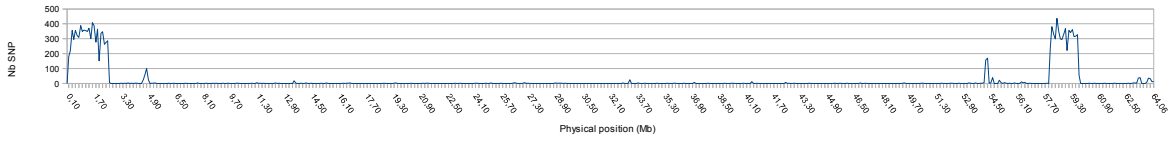

Plovdiv - Homozygous SNP

SL2.40ch04

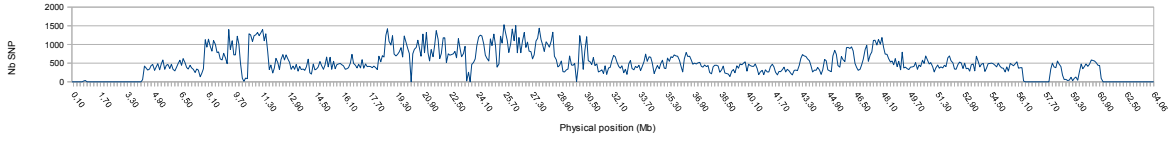

Stupicke - Homozygous SNP

SL2.40ch04

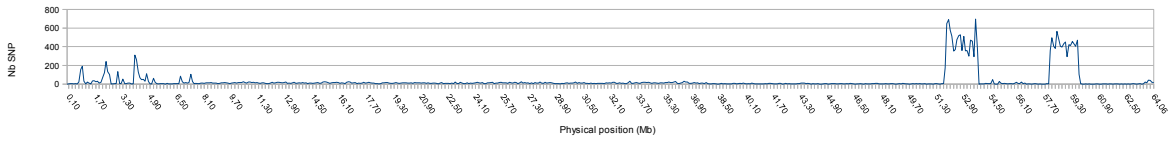

Cervil - Heterozygous SNP

SL2.40ch04

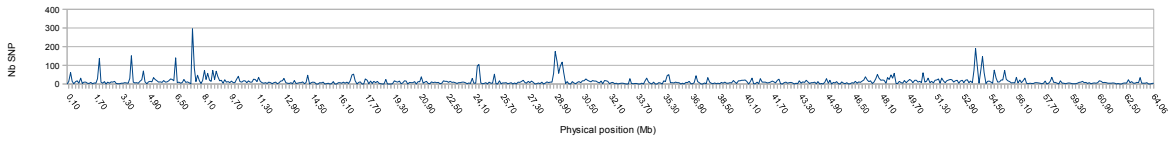

Criollo\_new - Heterozygous SNP

SL2.40ch04

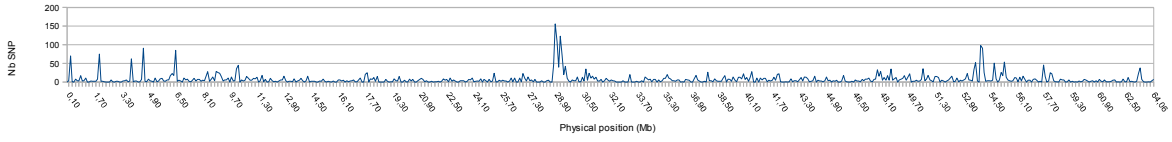

Ferum\_new - Heterozygous SNP

SL2.40ch04

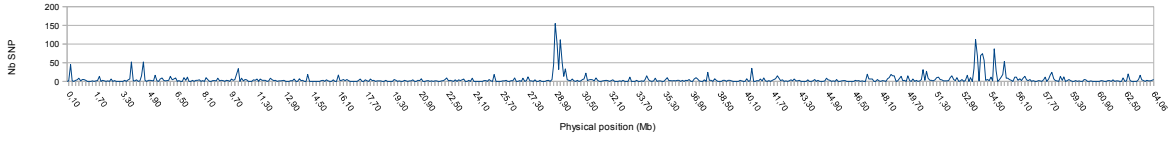

LA0147 - Heterozygous SNP

SL2.40ch04

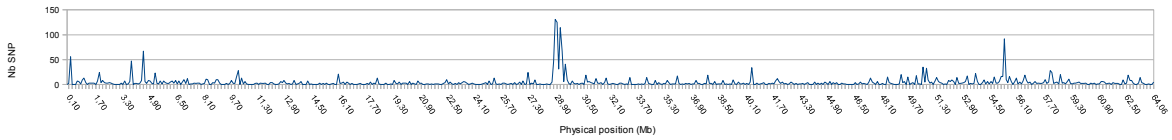

LA1420 - Heterozygous SNP

SL2.40ch04

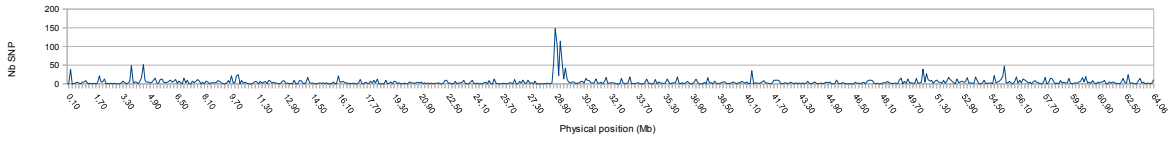

Levovil - Heterozygous SNP

SL2.40ch04

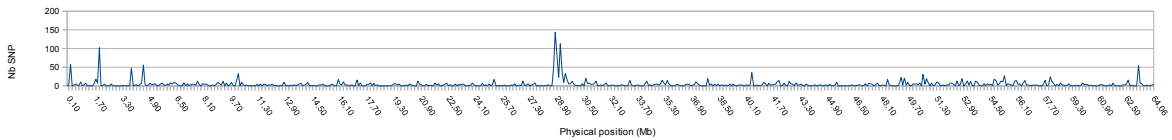

Plovidiv - Heterozygous SNP

SL2.40ch04

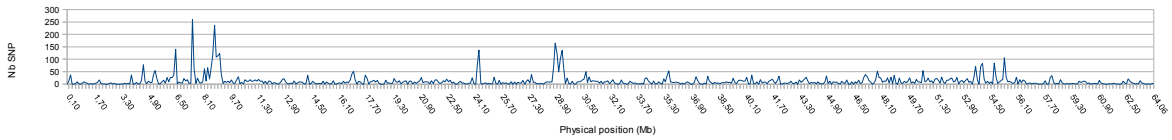

Stupicke - Heterozygous SNP

SL2.40ch04

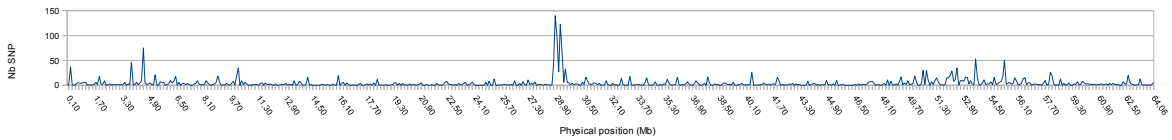

All\_100kb

Genes

SL2.40ch05

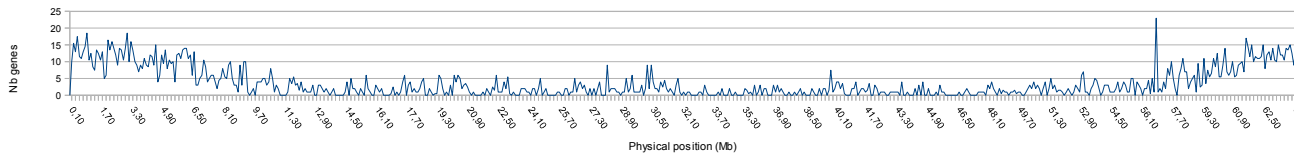

Homozygous SNP

SL2.40ch05

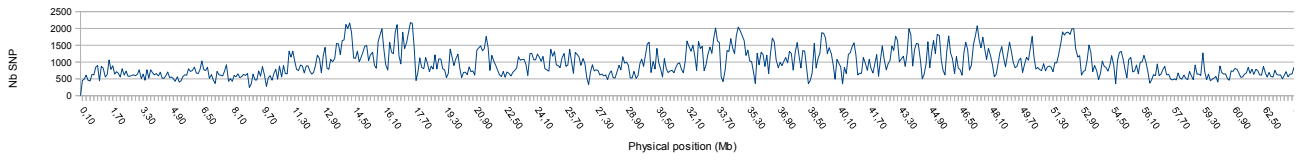

Heterozygous SNP

SL2.40ch05

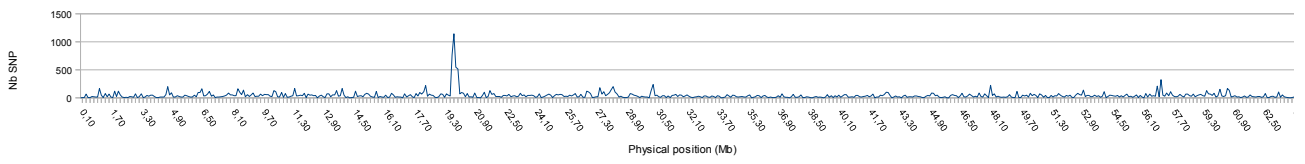

Homozygous InDel

SL2.40ch05

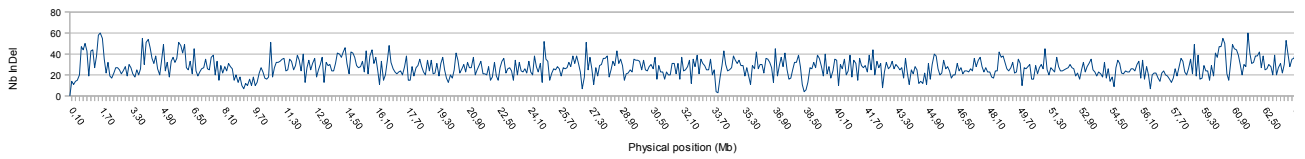

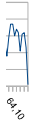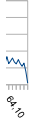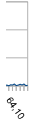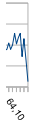



Cervi - Homozygous InDel

SL2.40ch04

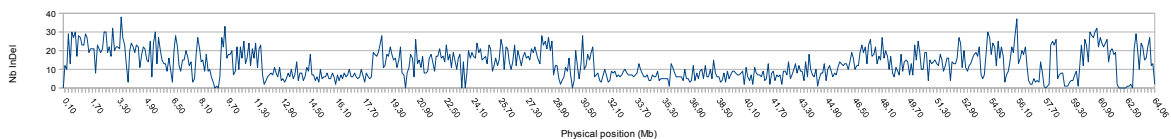

Criollo\_new - Homozygous InDel

SL2.40ch04

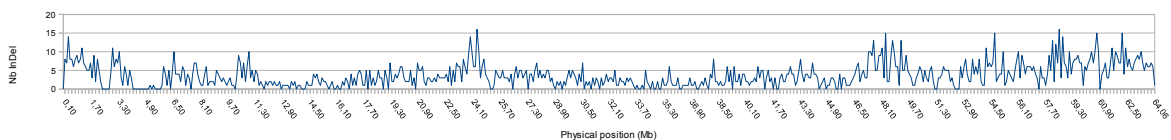

Ferum\_new - Homozygous InDel

SL2.40ch04

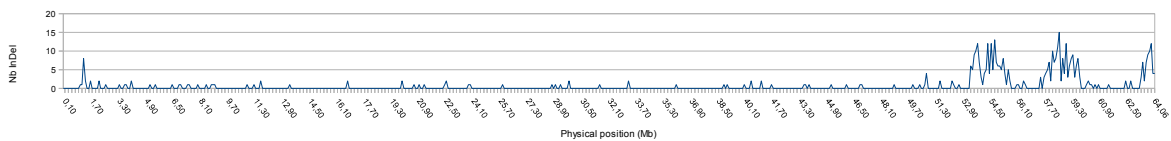

LA0147 - Homozygous InDel

SL2.40ch04

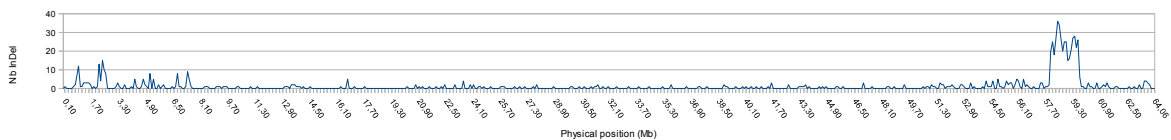

LA1420 - Homozygous InDel

SL2.40ch04

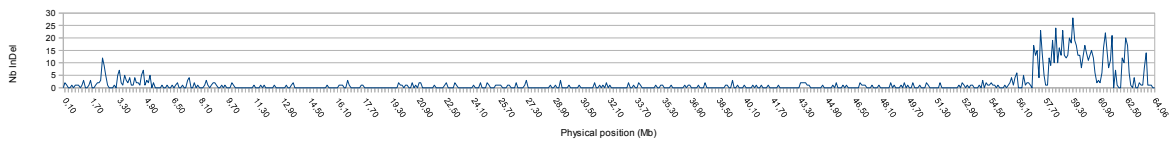

Levovil - Homozygous InDel

SL2.40ch04

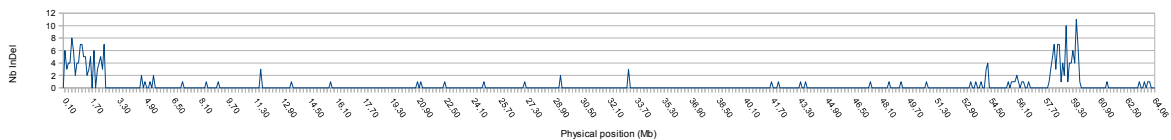

Plovidiv - Homozygous InDel

SL2.40ch04

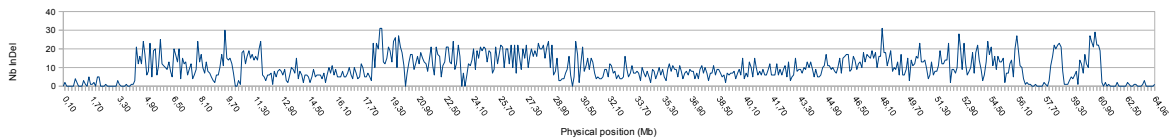

Stupicke - Homozygous InDel

SL2.40ch04

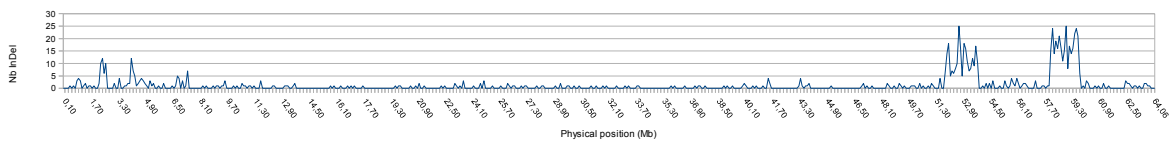

SNP hmz

Cervil - Homozygous SNP

SL2.40ch05

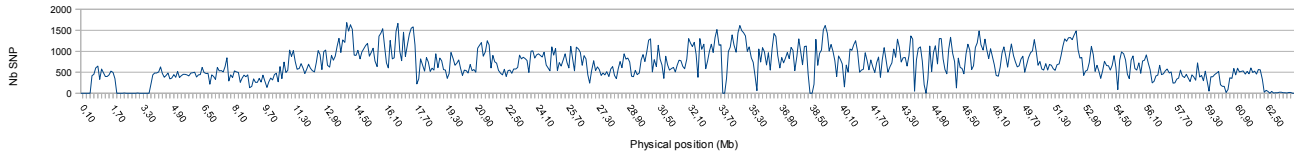

Plovdiv - Homozygous SNP

SL2.40ch05

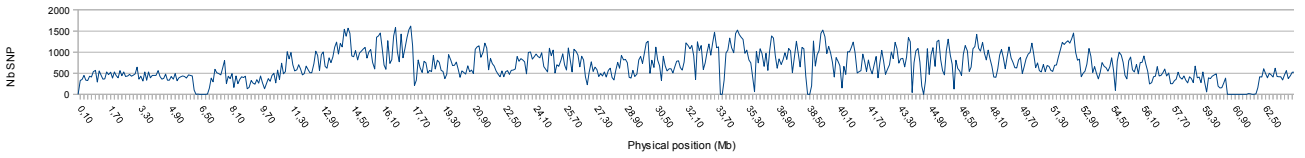

LA1420 - Homozygous SNP

SL2.40ch05

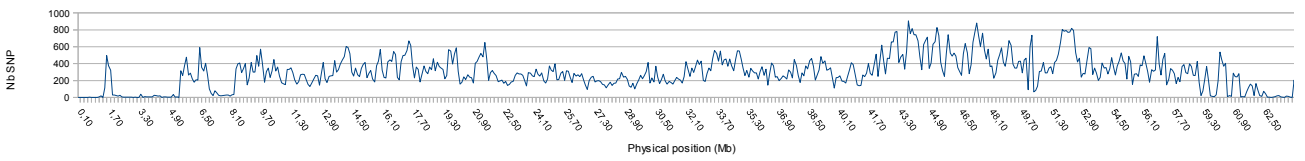

Criollo\_new - Homozygous SNP

SL2.40ch05

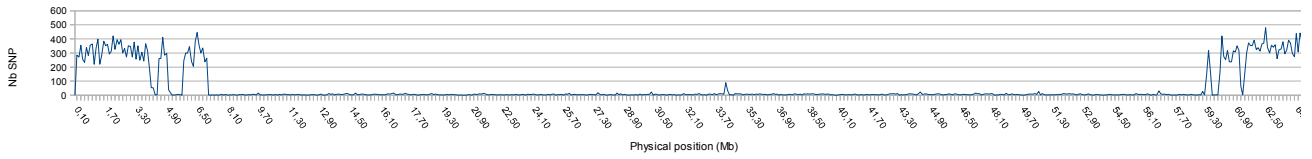

Stupicke - Homozygous SNP

SL2.40ch05

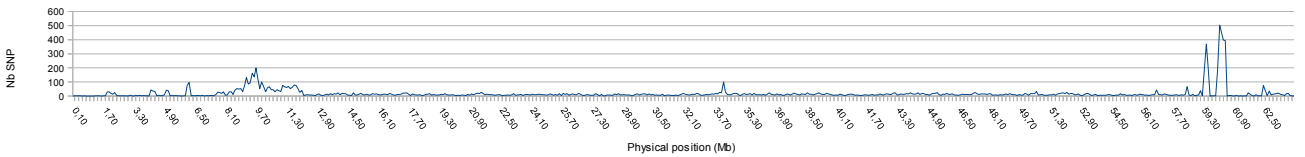

Ferum\_new - Homozygous SNP

SL2.40ch05

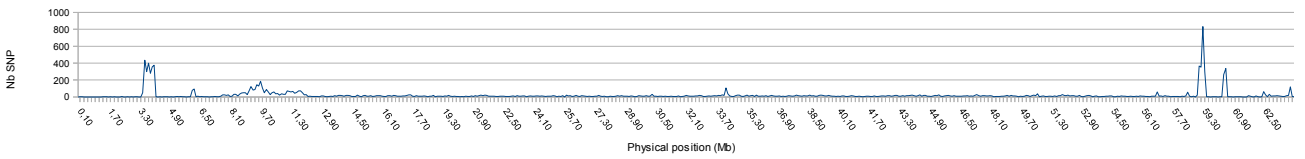

Levovil - Homozygous SNP

SL2.40ch05

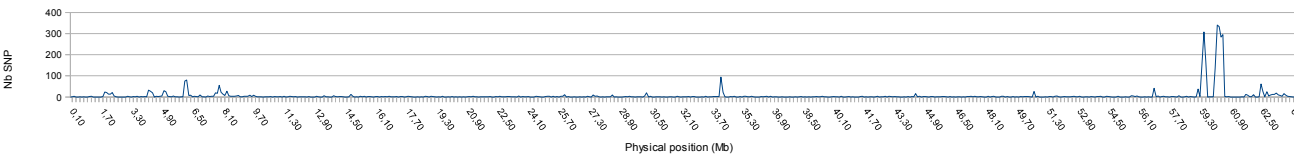

LA0147 - Homozygous SNP

SL2.40ch05

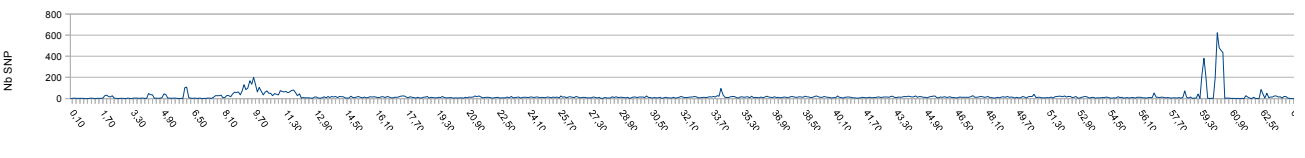

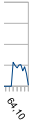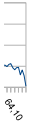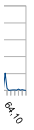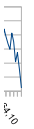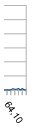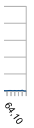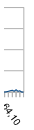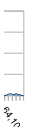

SNP htz

Cervil - Heterozygous SNP

SL2.40ch05

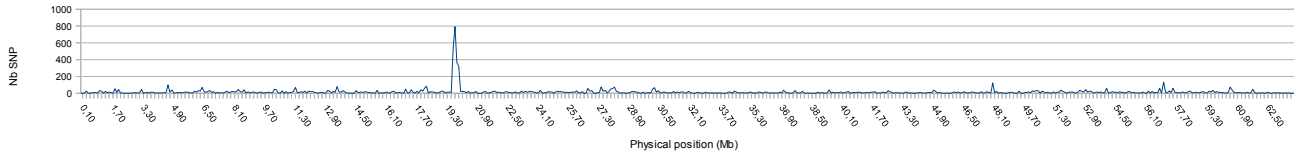

Criollo\_new - Heterozygous SNP

SL2.40ch05

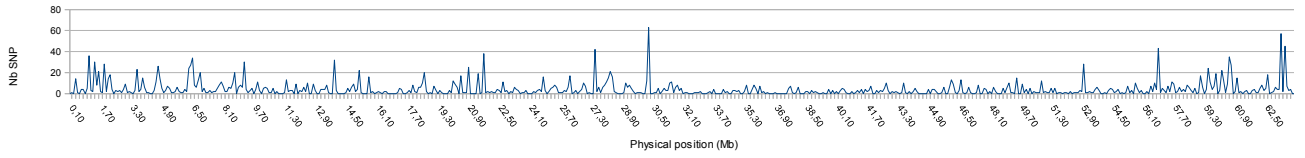

Ferum\_new - Heterozygous SNP

SL2.40ch05

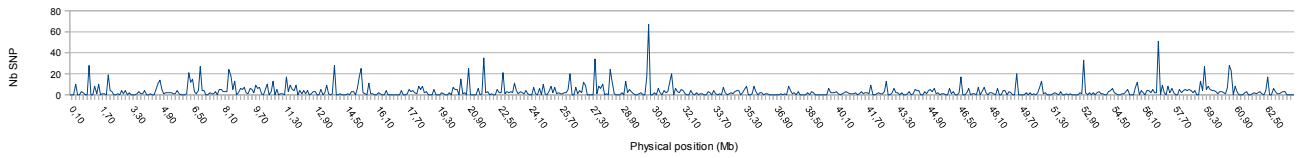

LA0147 - Heterozygous SNP

SL2.40ch05

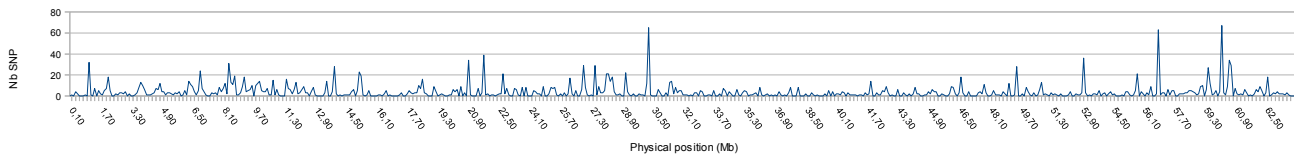

LA1420 - Heterozygous SNP

SL2.40ch05

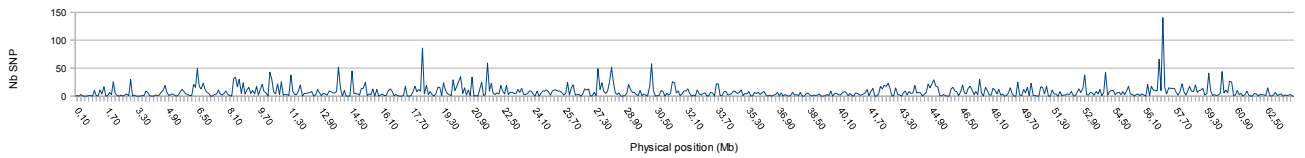

Levovil - Heterozygous SNP

SL2.40ch05

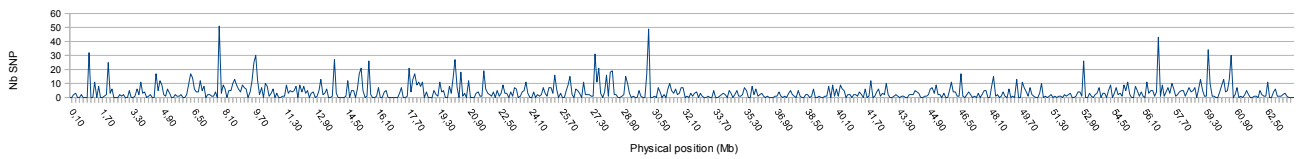

Plovdiv - Heterozygous SNP

SL2.40ch05

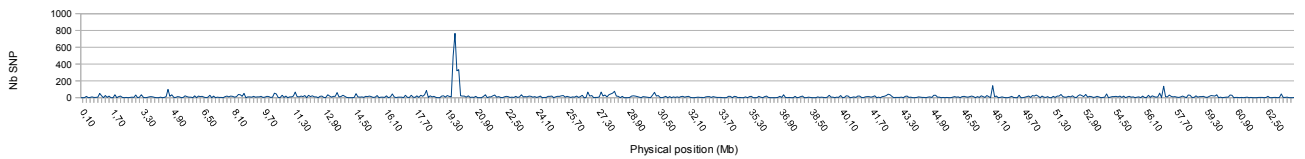

Stupicke - Heterozygous SNP

SL2.40ch05

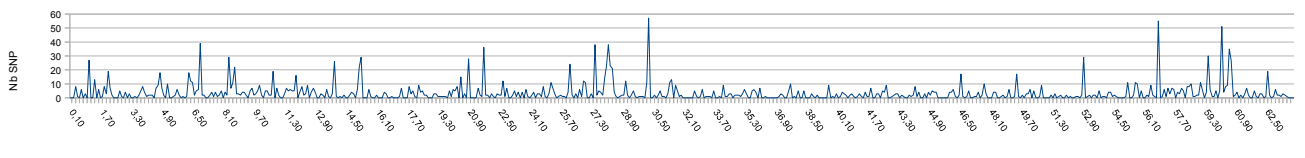

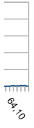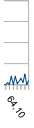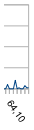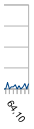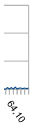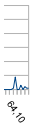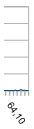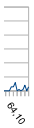

All\_100kb

Genes

SL2.40ch06

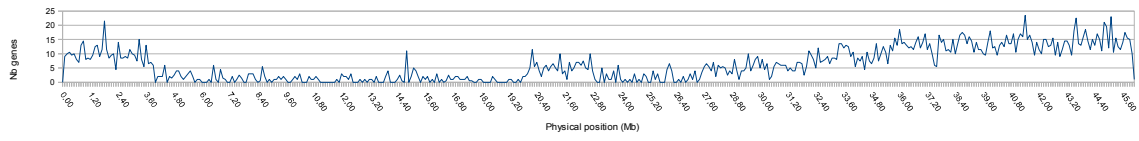

Homozygous SNP

SL2.40ch06

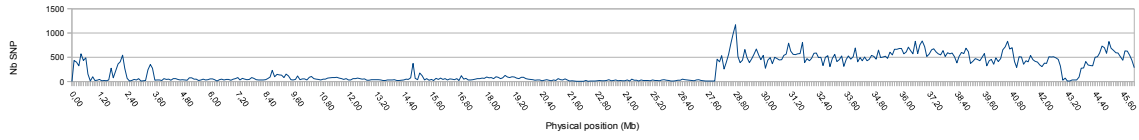

Heterozygous SNP

SL2.40ch06

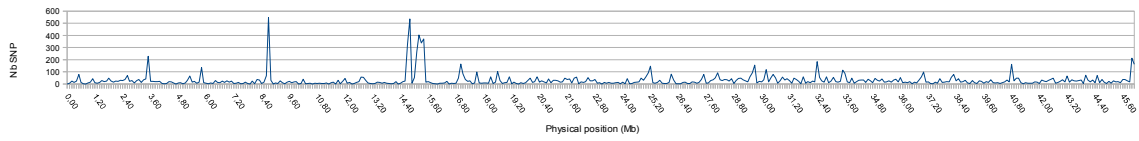

Homozygous InDel

SL2.40ch06

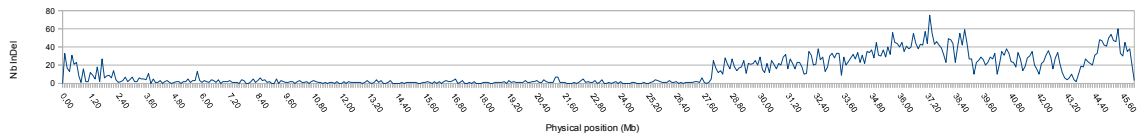

InDel hnz

Cervil - Homozygous InDel

SL2.40ch06

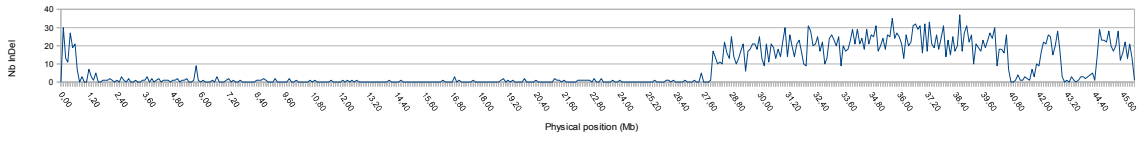

Criolo\_new - Homozygous InDel

SL2.40ch06

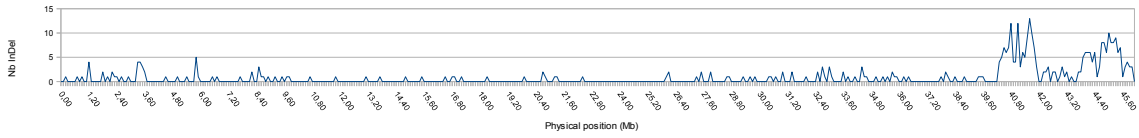

Ferum\_new - Homozygous InDel

SL2.40ch06

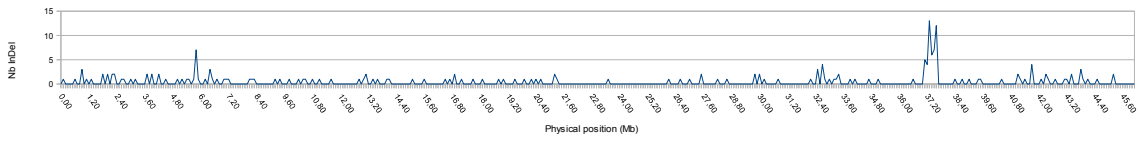

LA0147 - Homozygous InDel

SL2.40ch06

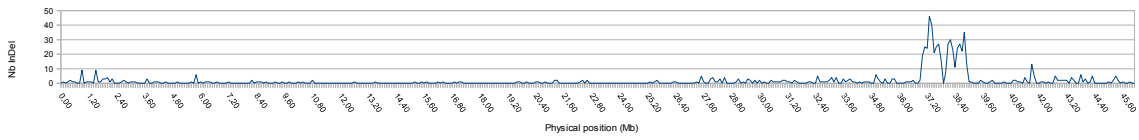

LA1420 - Homozygous InDel

SL2.40ch06

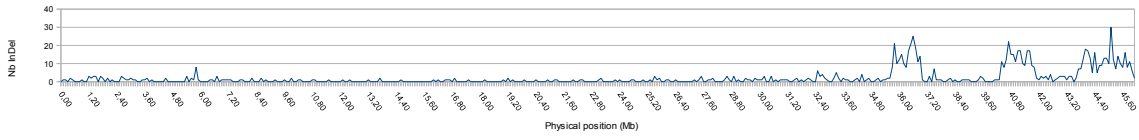

Levovil - Homozygous InDel

SL2.40ch06

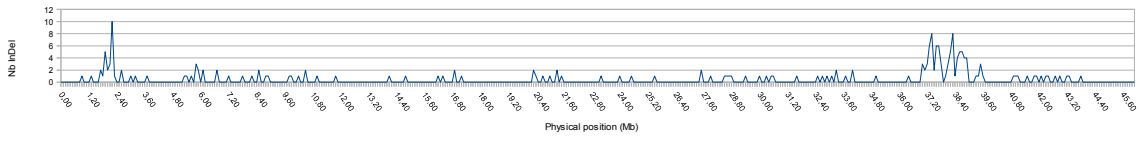

Plovdiv - Homozygous InDel

SL2.40ch06

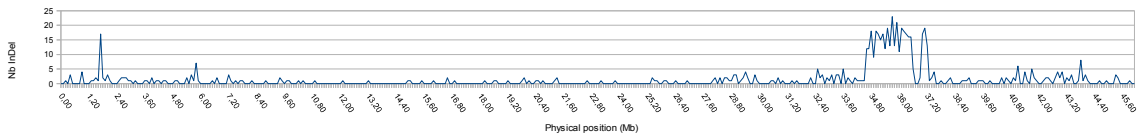

Stupicke - Homozygous InDel

SL2.40ch06

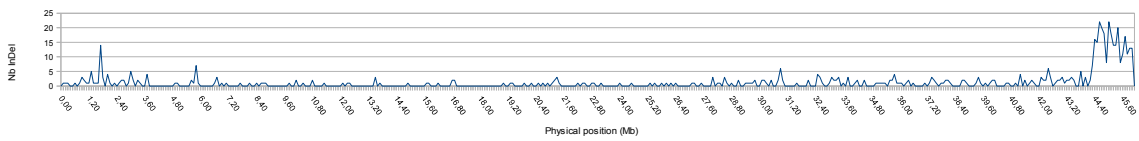

SNP hmz

Cervil - Homozygous SNP

SL2.40ch06

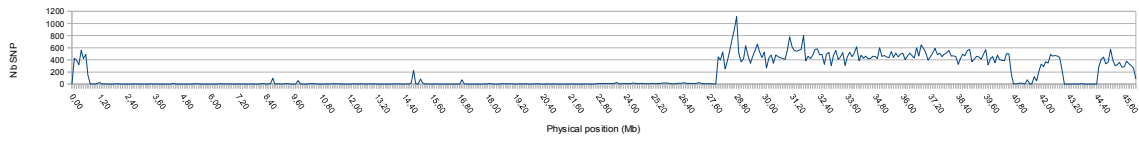

Criollo\_new - Homozygous SNP

SL2.40ch06

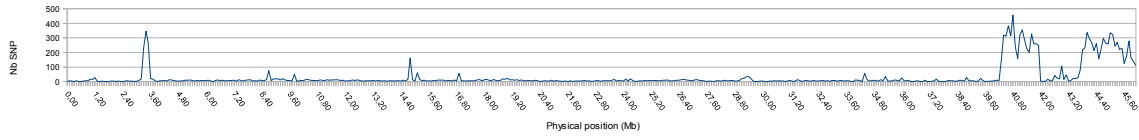

Ferum\_new - Homozygous SNP

SL2.40ch06

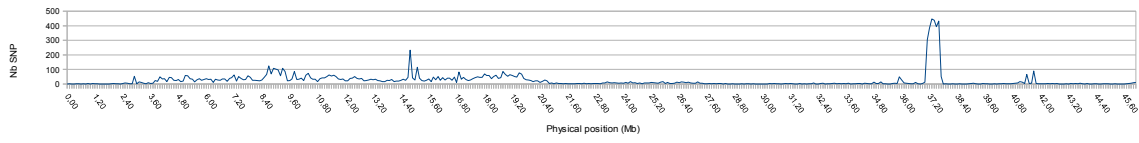

LA0147 - Homozygous SNP

SL2.40ch06

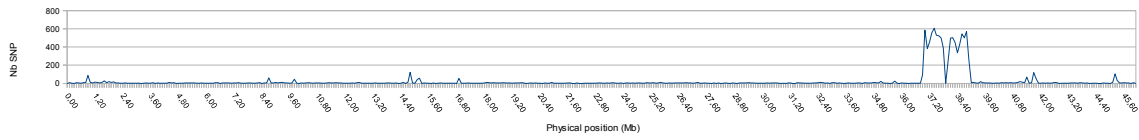

LA1420 - Homozygous SNP

SL2.40ch06

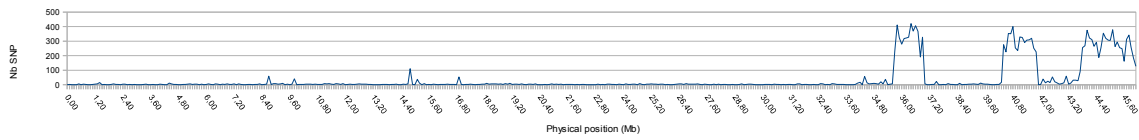

Levovil - Homozygous SNP

SL2.40ch06

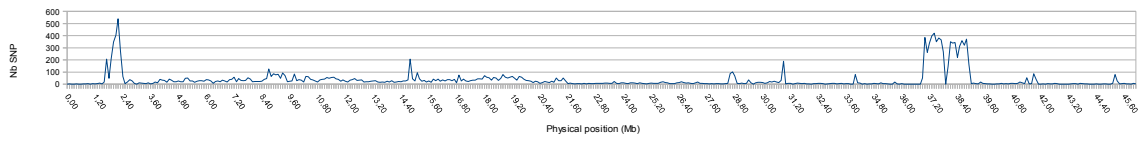

Plovdiv - Homozygous SNP

SL2.40ch06

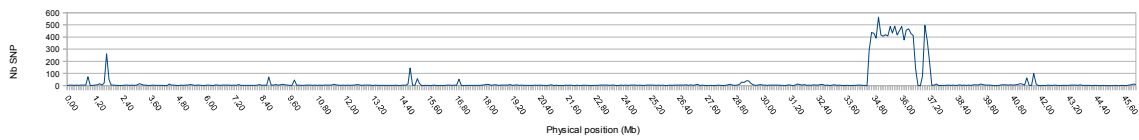

Stupicke - Homozygous SNP

SL2.40ch06

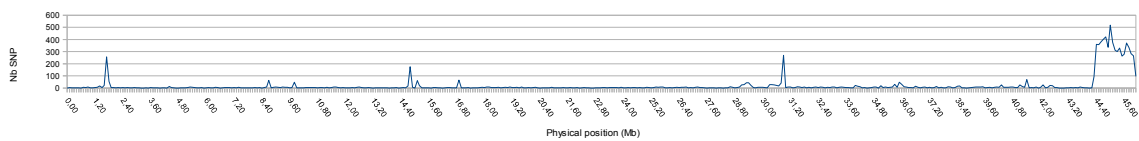



SNP htz

Cervil - Heterozygous SNP

SL2.40ch06

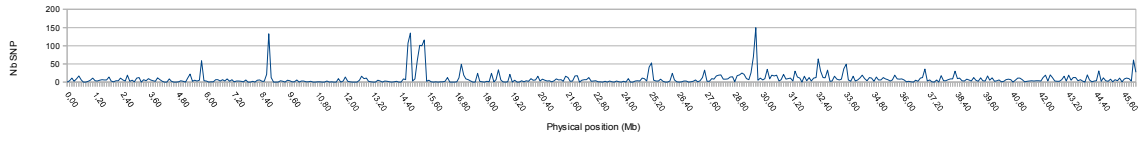

Criollo\_new - Heterozygous SNP

SL2.40ch06

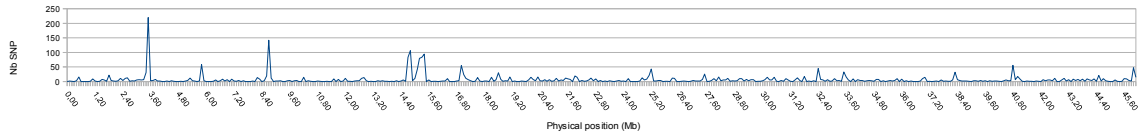

Ferum\_new - Heterozygous SNP

SL2.40ch06

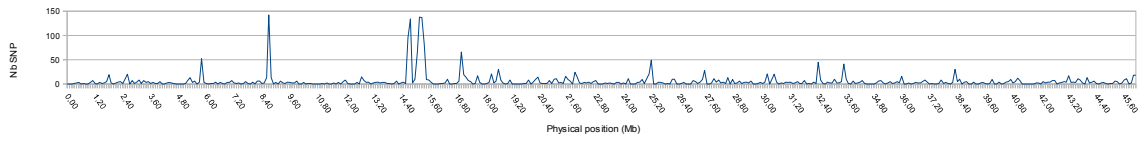

LA0147 - Heterozygous SNP

SL2.40ch06

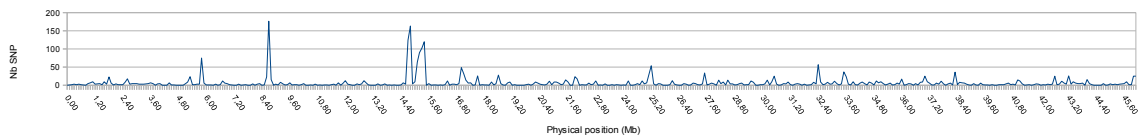

LA1420 - Heterozygous SNP

SL2.40ch06

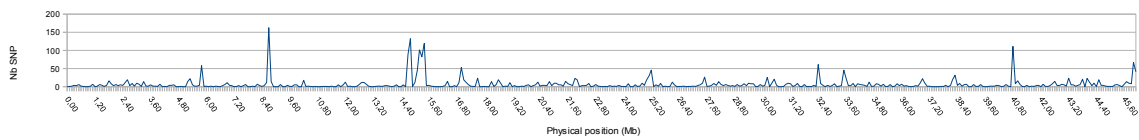

Levovil - Heterozygous SNP

SL2.40ch06

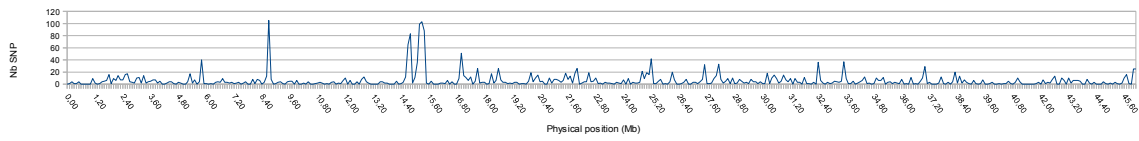

Plovidiv - Heterozygous SNP

SL2.40ch06

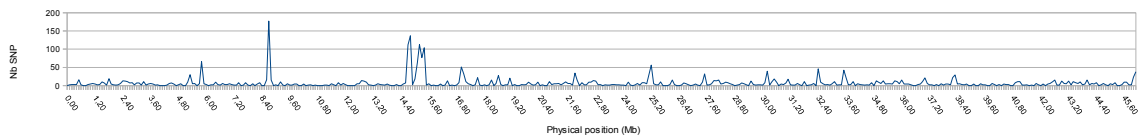

Stupicke - Heterozygous SNP

SL2.40ch06

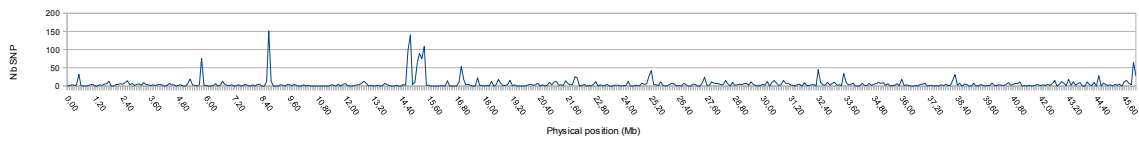

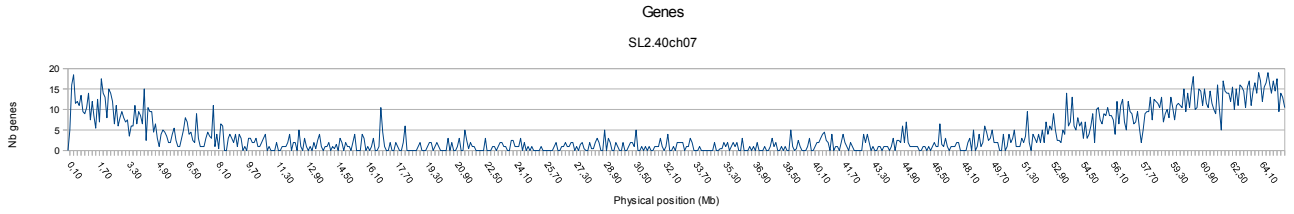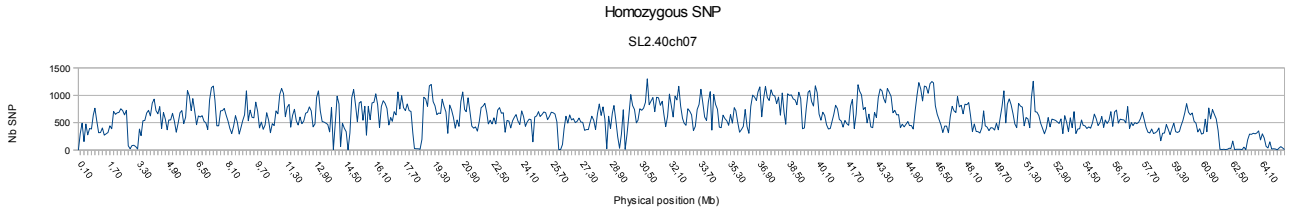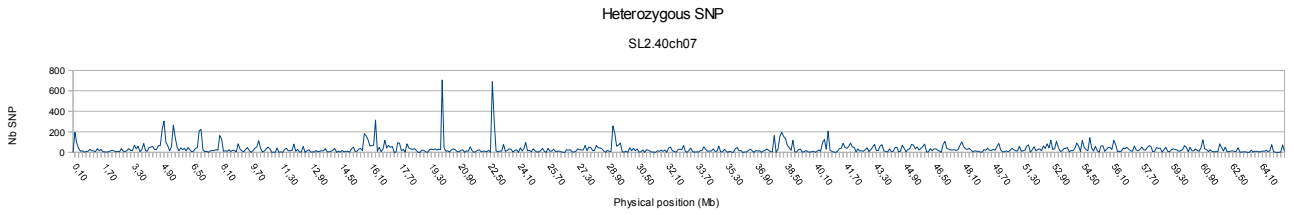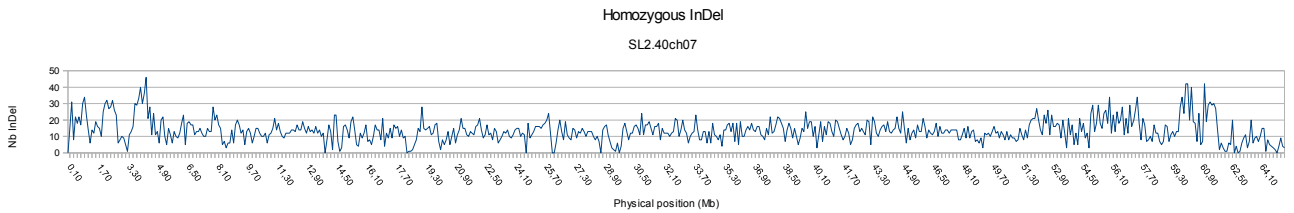

Cervil - Homozygous InDel

SL2.40ch07

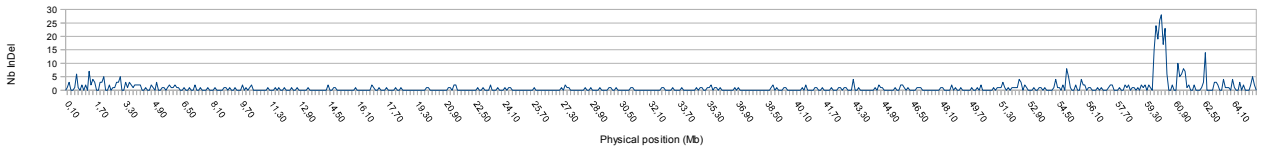

Criollo\_new - Homozygous InDel

SL2.40ch07

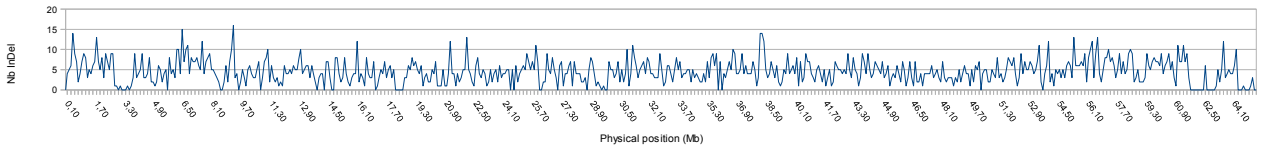

Ferum\_new - Homozygous InDel

SL2.40ch07

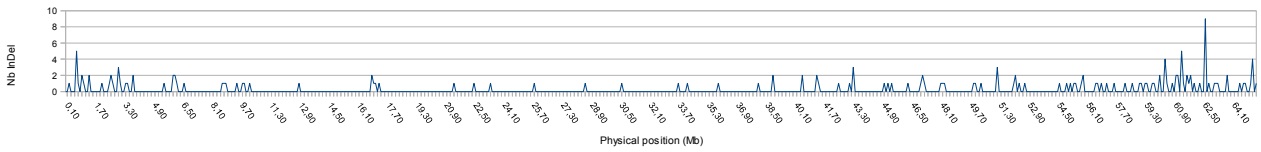

LA0147 - Homozygous InDel

SL2.40ch07

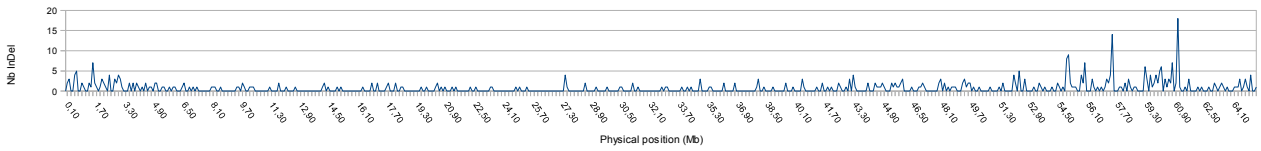

LA1420 - Homozygous InDel

SL2.40ch07

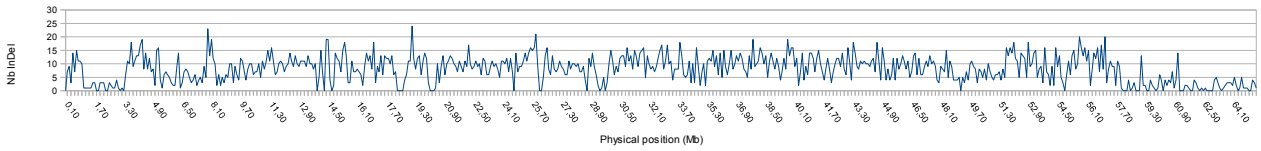

Levovil - Homozygous InDel

SL2.40ch07

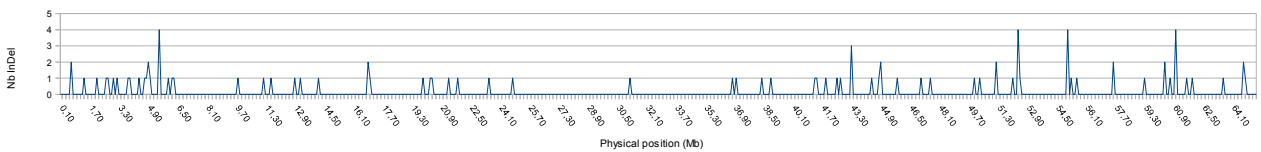

Plovdiv - Homozygous InDel

SL2.40ch07

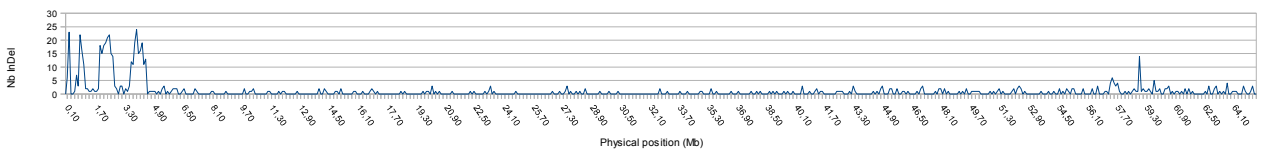

Stupicke - Homozygous InDel

SL2.40ch07

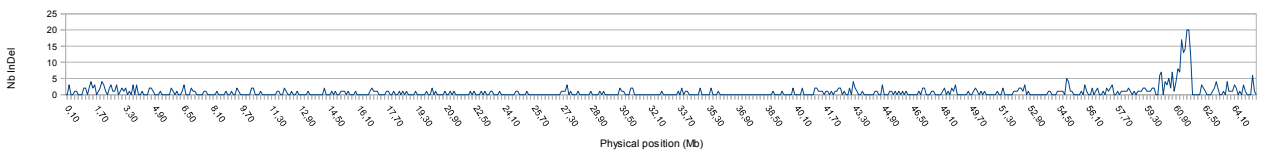

SNP hnz

Cervil - Homozygous SNP

SL2.40ch07

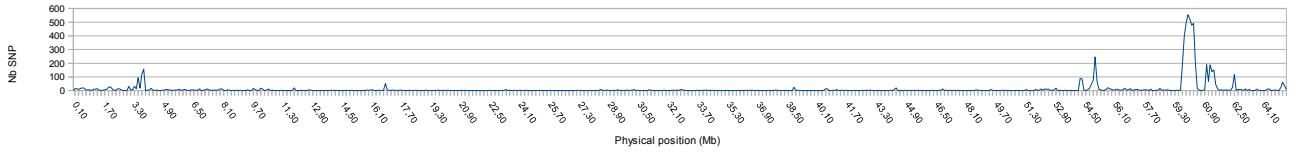

Criollo\_new - Homozygous SNP

SL2.40ch07

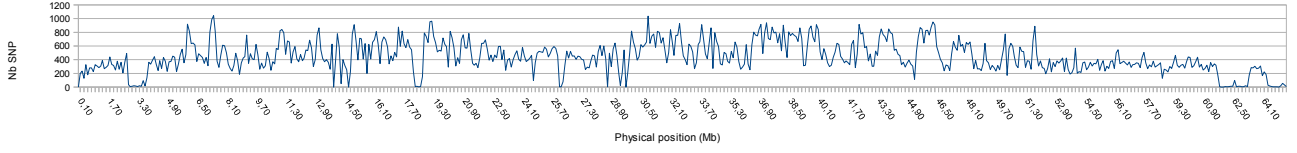

Ferum\_new - Homozygous SNP

SL2.40ch07

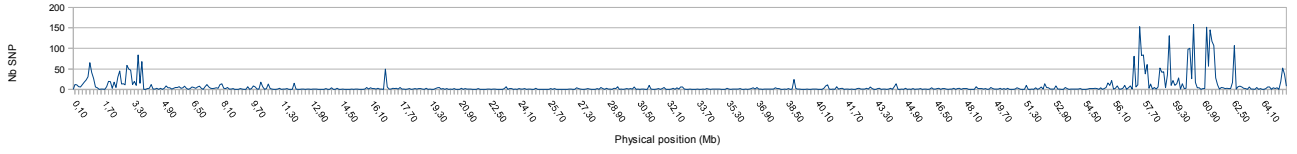

LA0147 - Homozygous SNP

SL2.40ch07

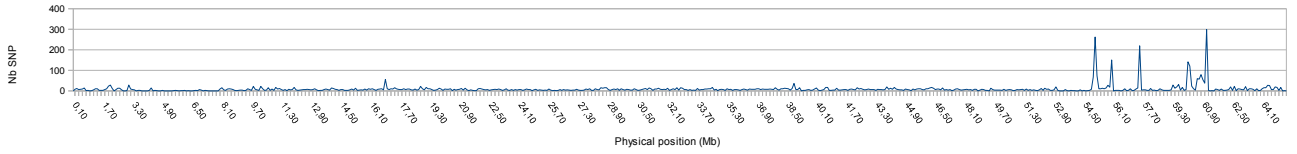

LA1420 - Homozygous SNP

SL2.40ch07

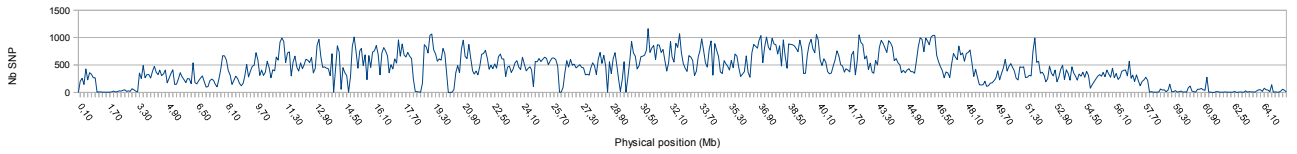

Levovil - Homozygous SNP

SL2.40ch07

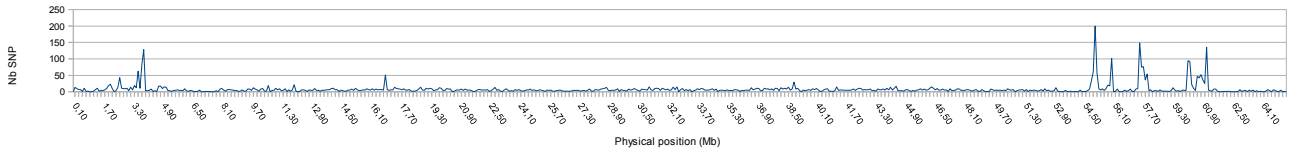

Plovidiv - Homozygous SNP

SL2.40ch07

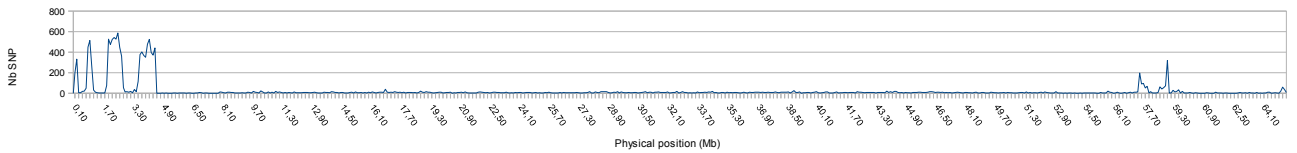

Stupicke - Homozygous SNP

SL2.40ch07

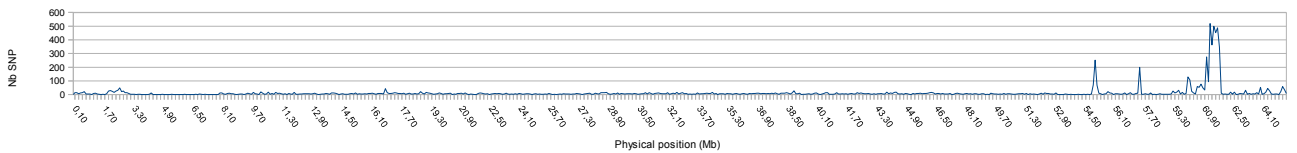

SNP htz

Cervil - Heterozygous SNP

SL2.40ch07

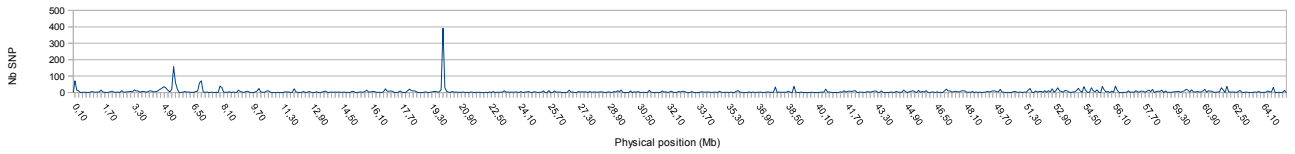

Criollo\_new - Heterozygous SNP

SL2.40ch07

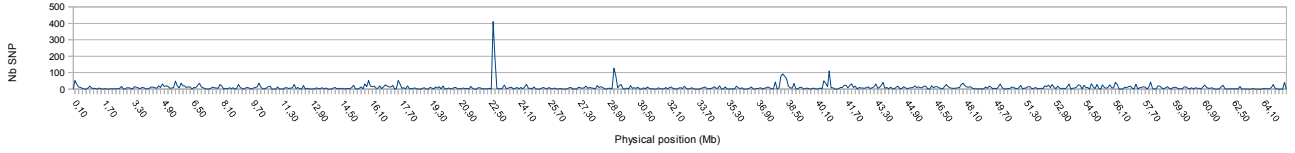

Ferum\_new - Heterozygous SNP

SL2.40ch07

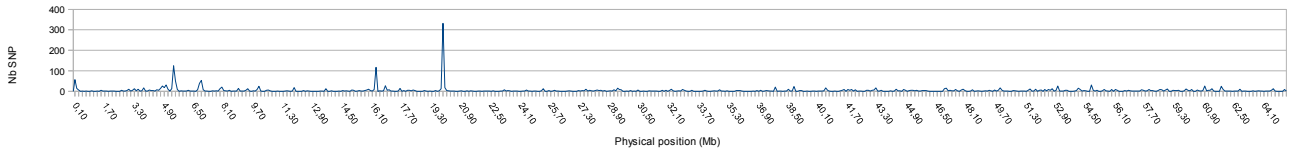

LA0147 - Heterozygous SNP

SL2.40ch07

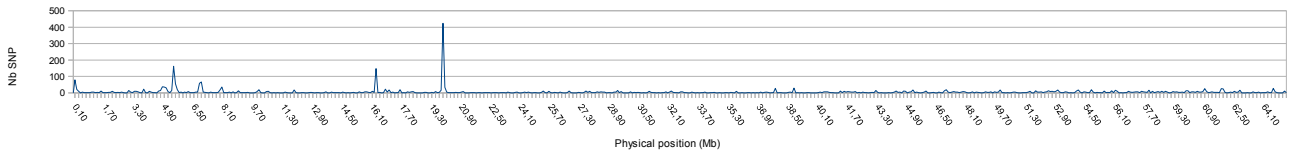

LA1420 - Heterozygous SNP

SL2.40ch07

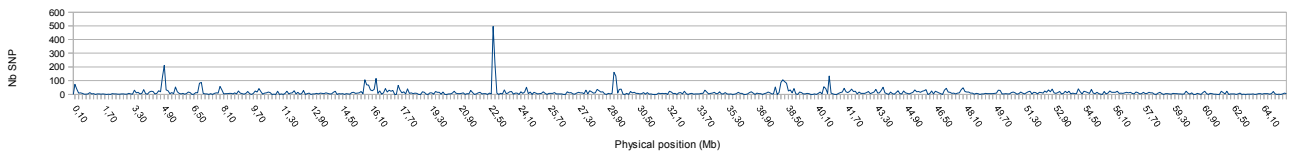

Levovil - Heterozygous SNP

SL2.40ch07

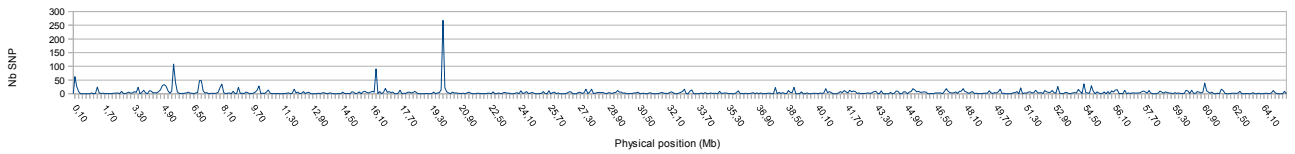

Plovdiv - Heterozygous SNP

SL2.40ch07

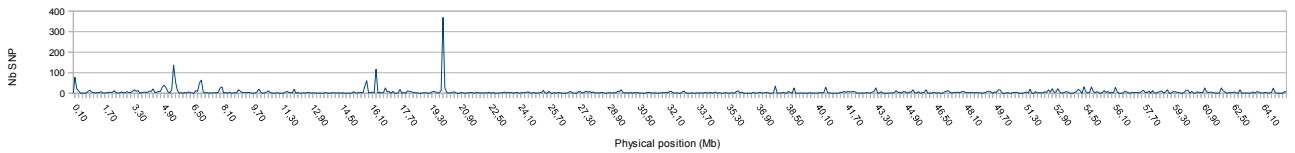

Stupicke - Heterozygous SNP

SL2.40ch07

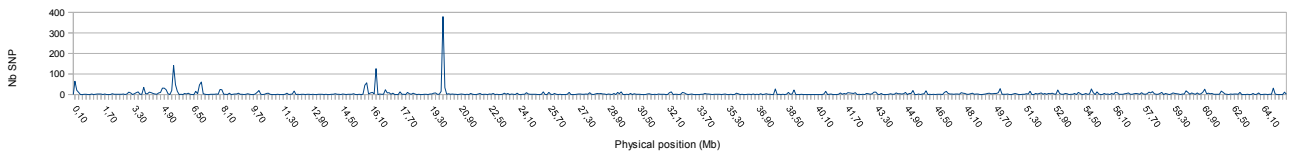

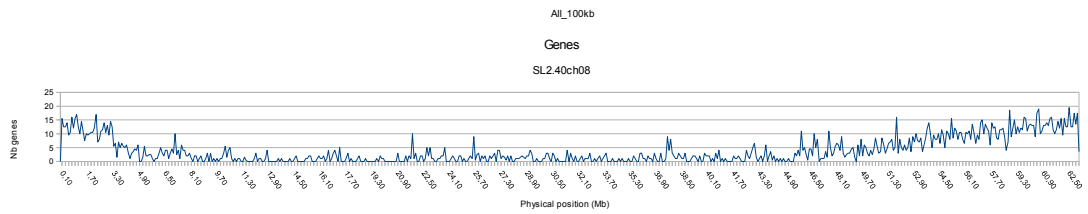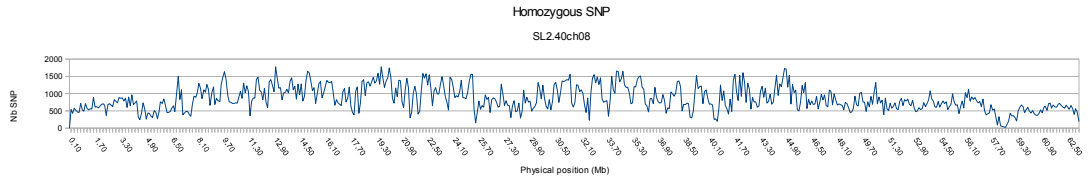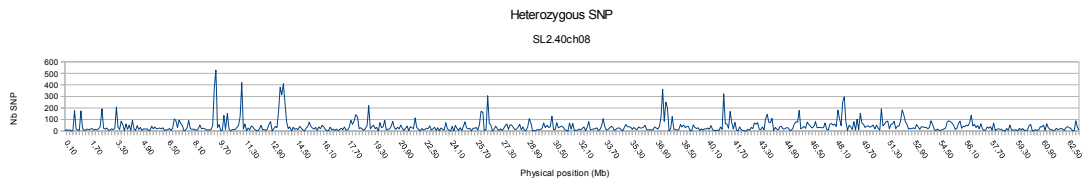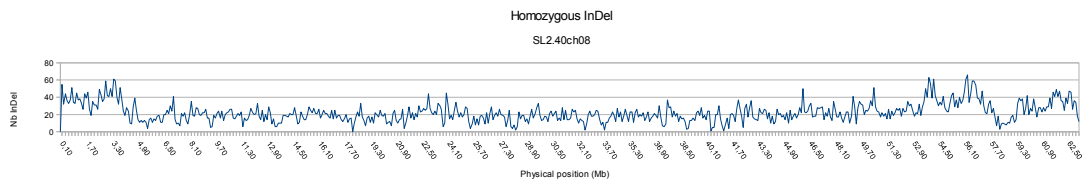

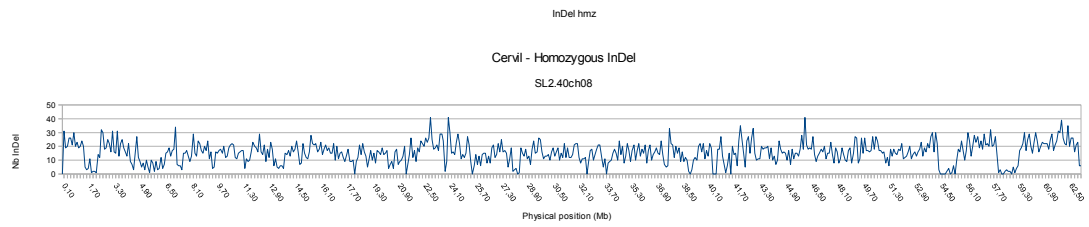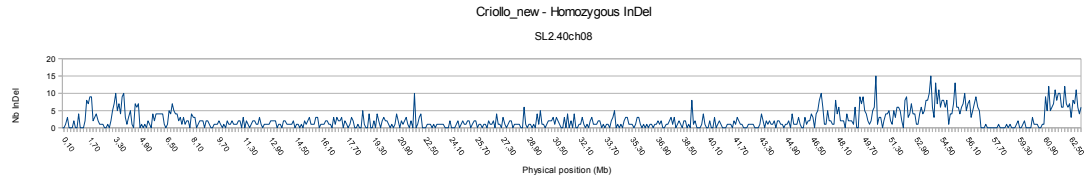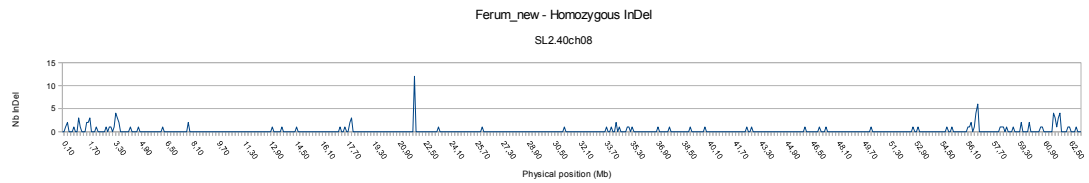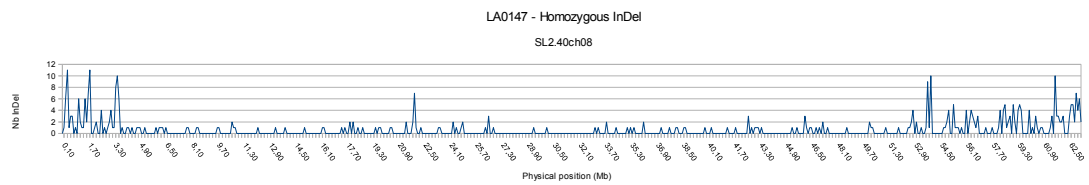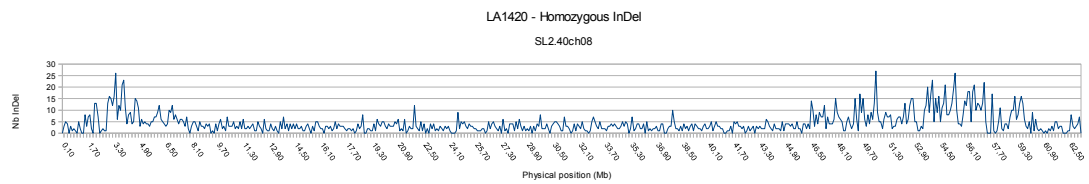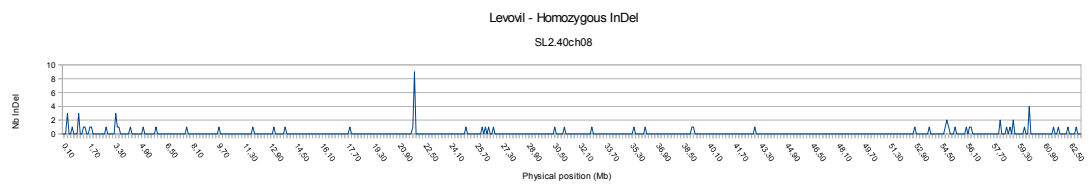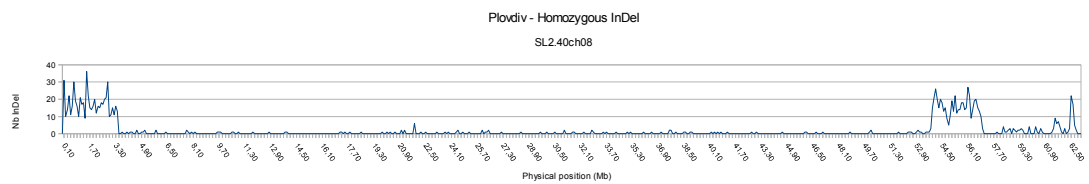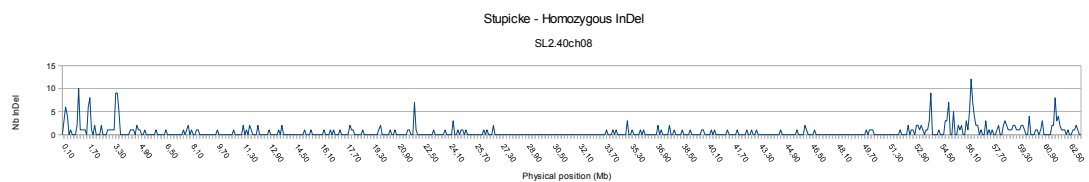

SNP htz

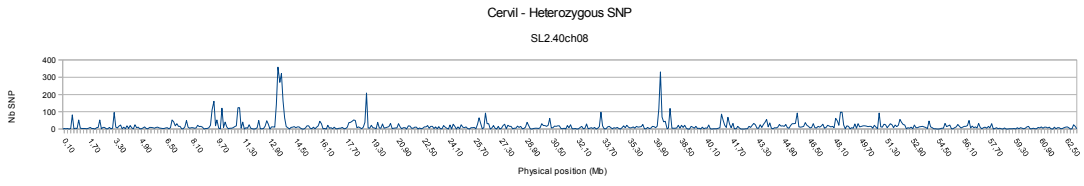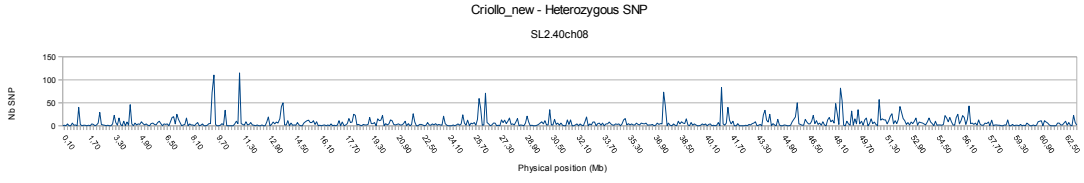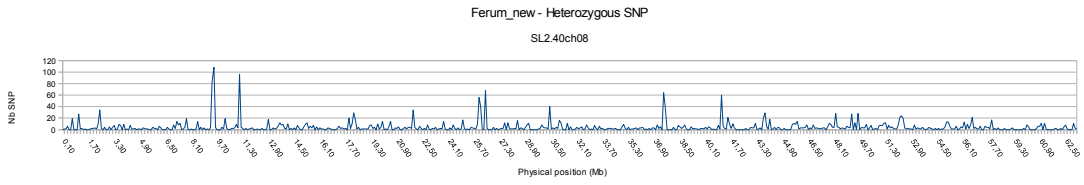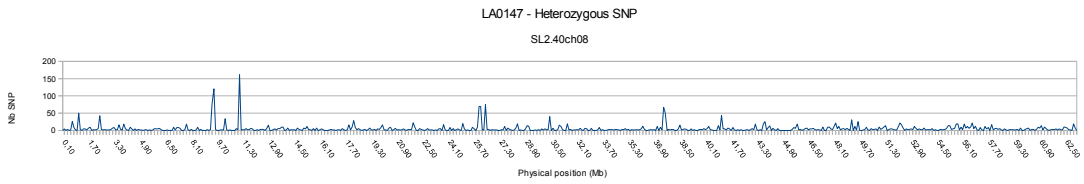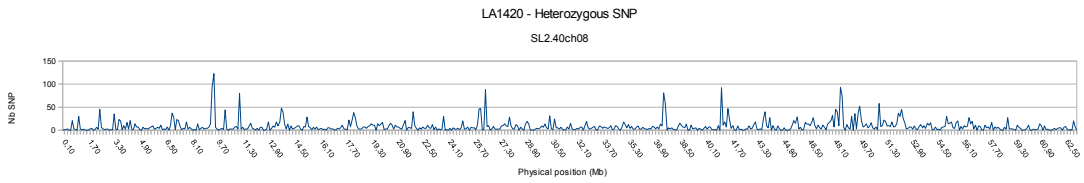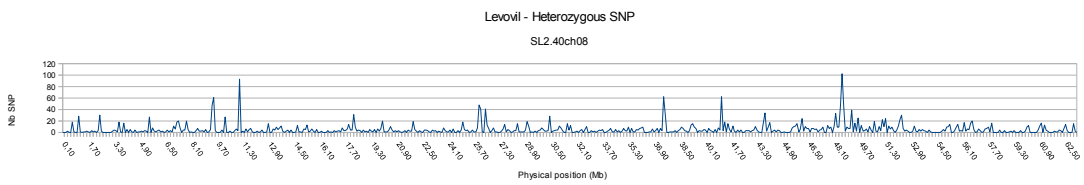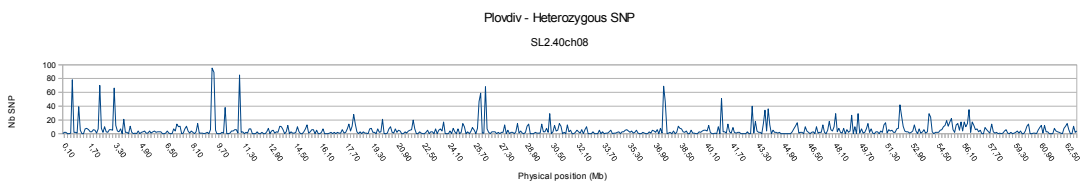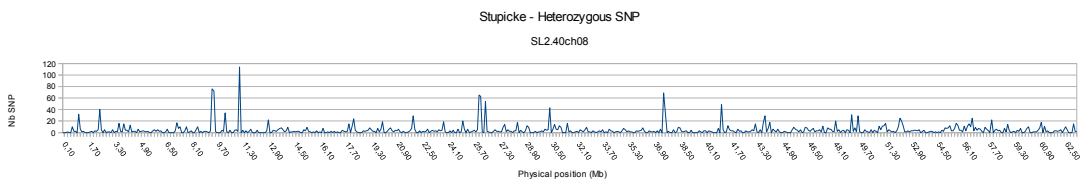



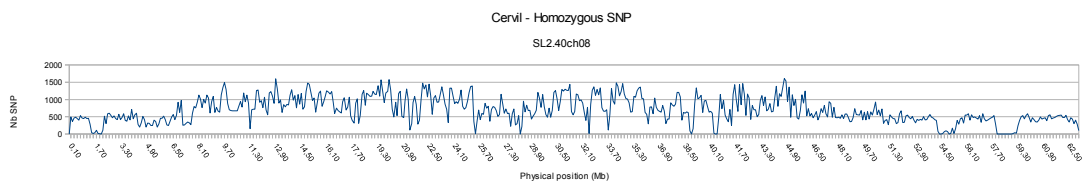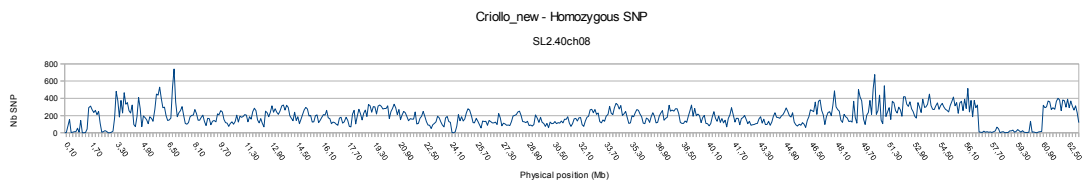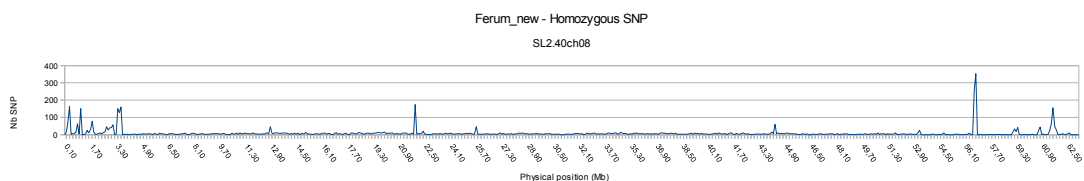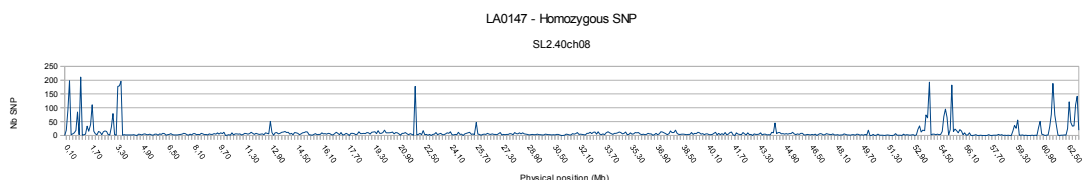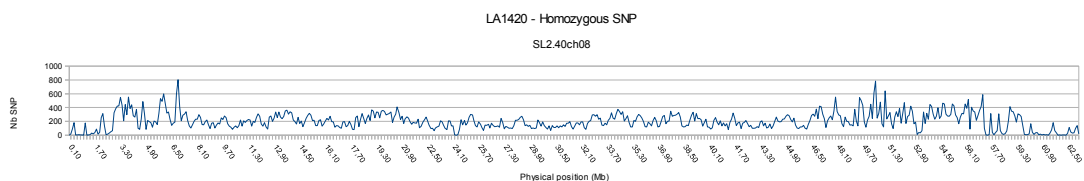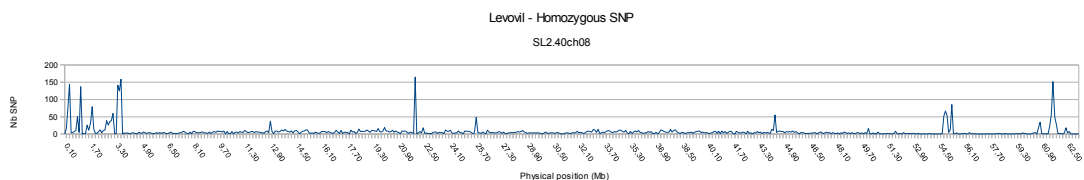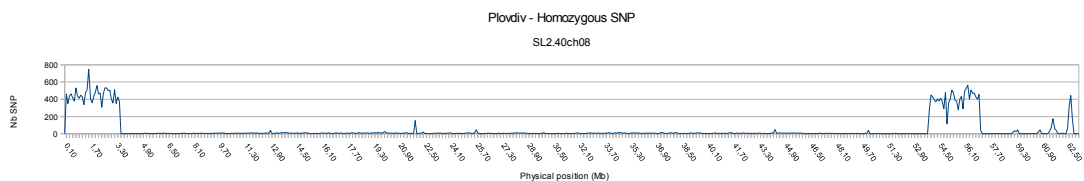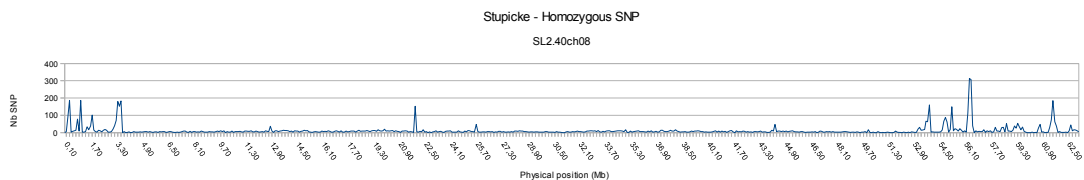

All\_100kb

Genes

SL2.40ch09

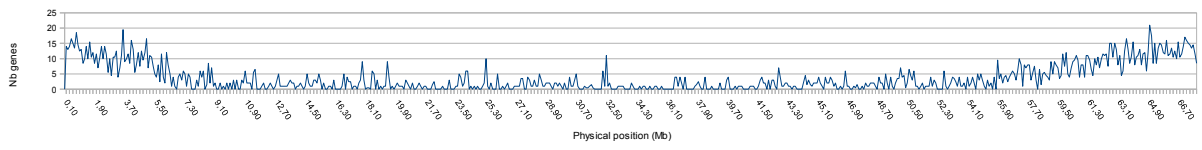

Homozygous SNP

SL2.40ch09

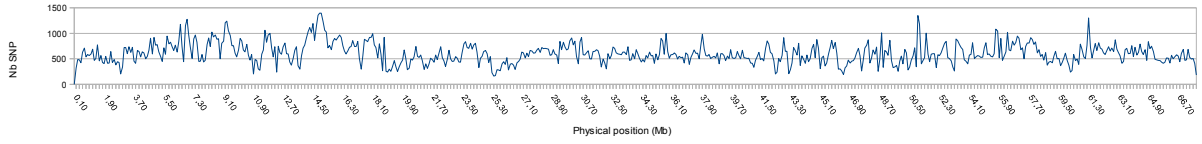

Heterozygous SNP

SL2.40ch09

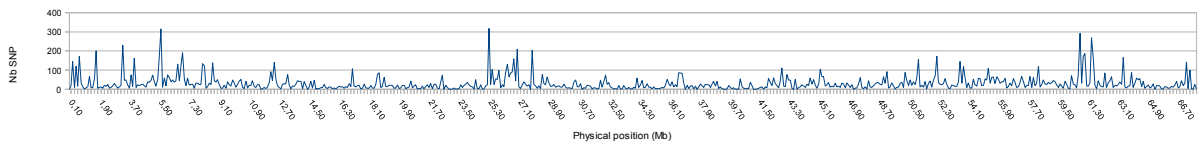

Homozygous InDel

SL2.40ch09

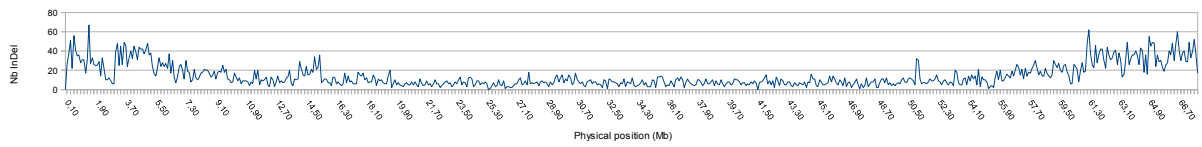

InDel hmz

Cervil - Homozygous InDel

SL2.40ch09

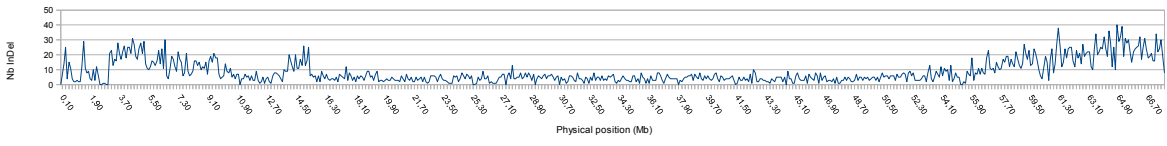

Criollo\_new - Homozygous InDel

SL2.40ch09

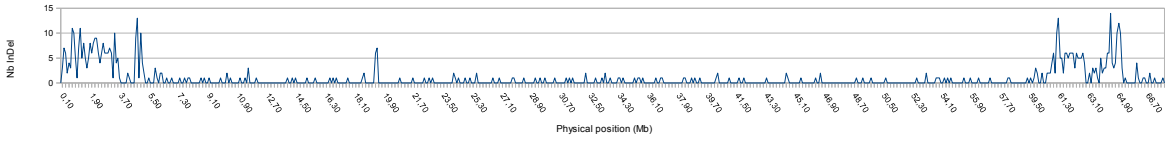

Ferum\_new - Homozygous InDel

SL2.40ch09

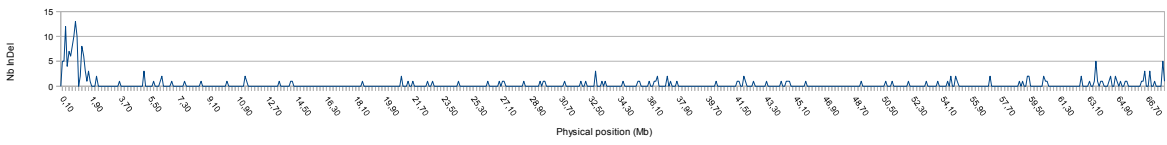

LA0147 - Homozygous InDel

SL2.40ch09

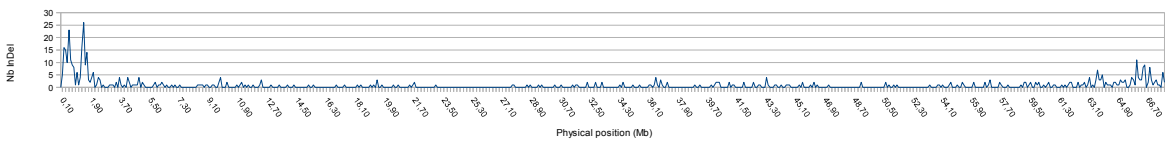

LA1420 - Homozygous InDel

SL2.40ch09

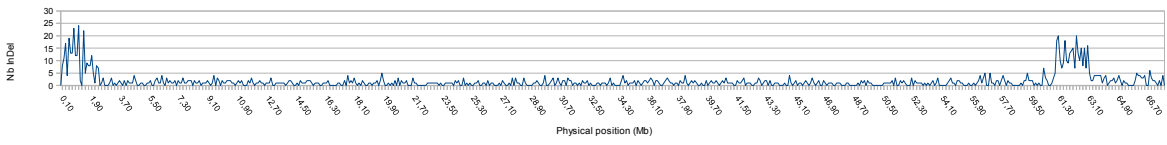

Levovil - Homozygous InDel

SL2.40ch09

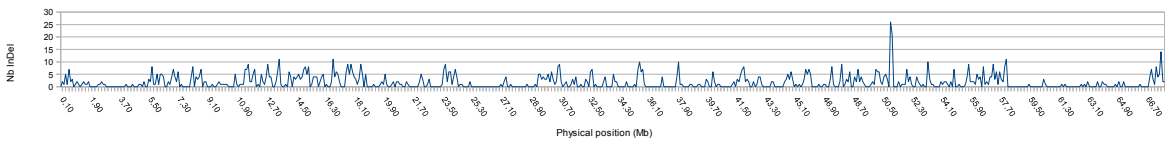

Plovdiv - Homozygous InDel

SL2.40ch09

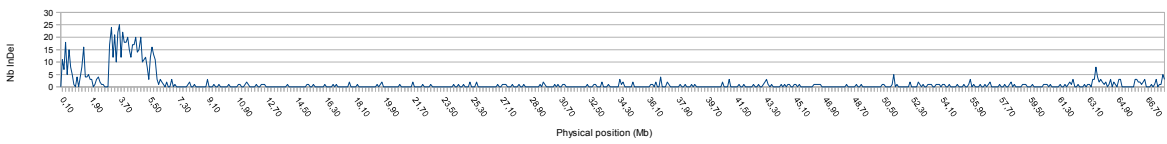

Stupicke - Homozygous InDel

SL2.40ch09

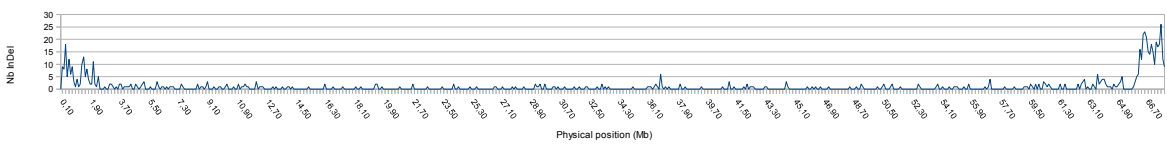

SNP hnz

Cervil - Homozygous SNP

SL2.40ch09

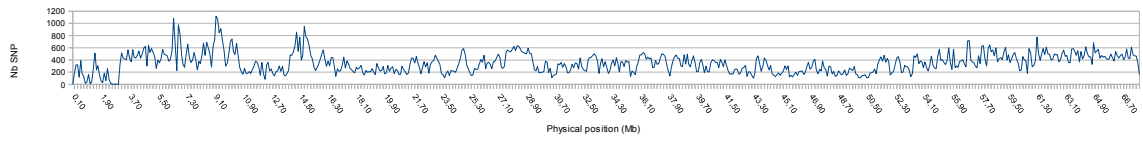

Criollo\_new - Homozygous SNP

SL2.40ch09

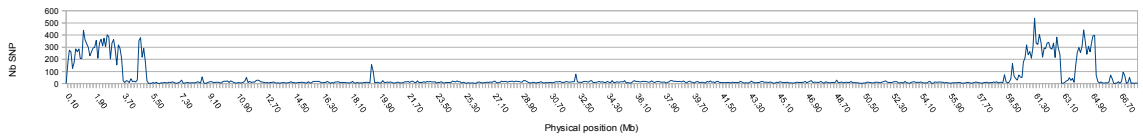

Ferum\_new - Homozygous SNP

SL2.40ch09

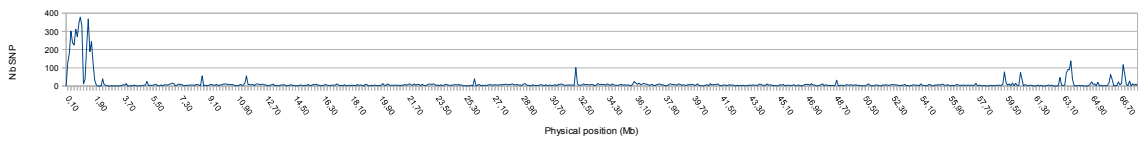

LA0147 - Homozygous SNP

SL2.40ch09

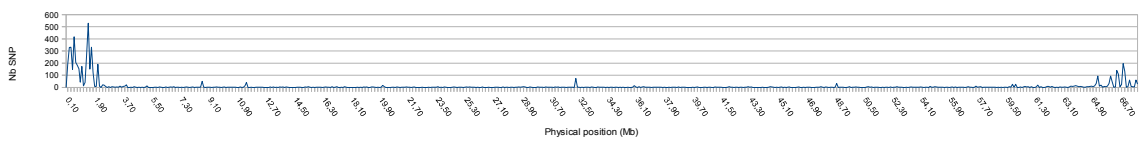

LA1420 - Homozygous SNP

SL2.40ch09

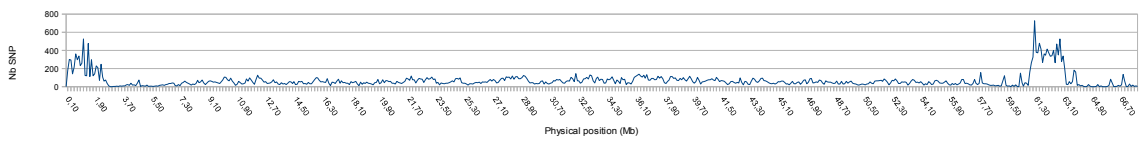

Levovil - Homozygous SNP

SL2.40ch09

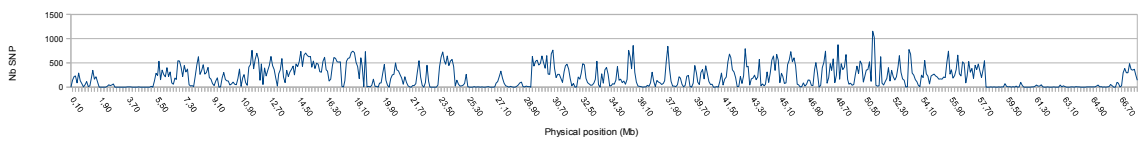

Plovdiv - Homozygous SNP

SL2.40ch09

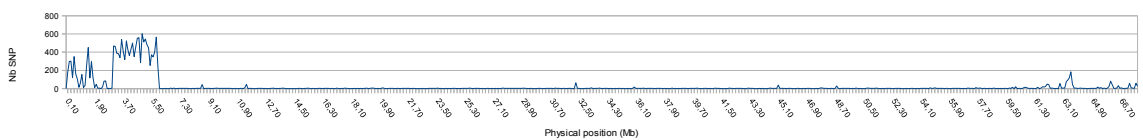

Stupicke - Homozygous SNP

SL2.40ch09

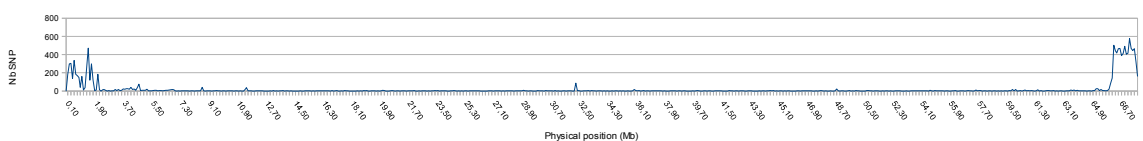

All\_100kb

Genes

SL2.40ch10

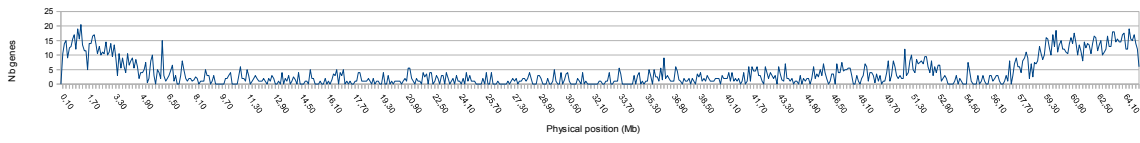

Homozygous SNP

SL2.40ch10

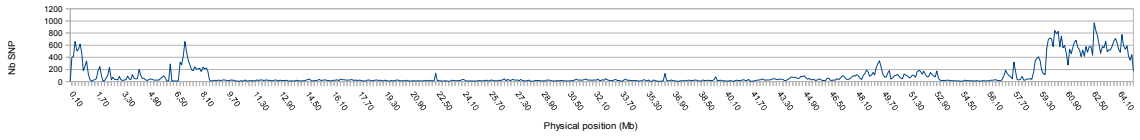

Heterozygous SNP

SL2.40ch10

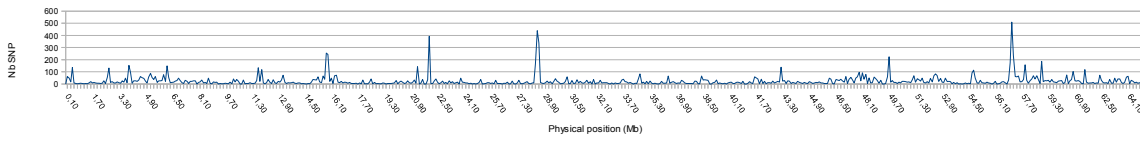

Homozygous InDel

SL2.40ch10

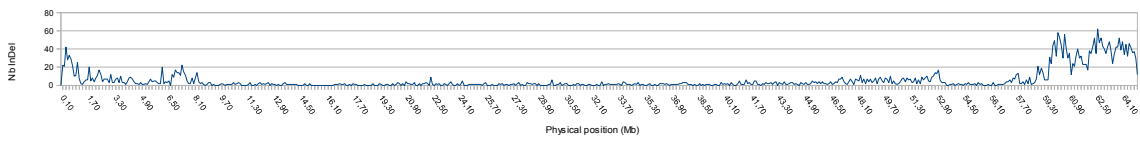

InDel hnz

Cervil - Homozygous InDel  
SL2.40ch10

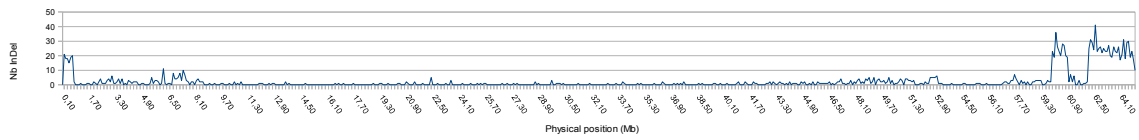

Criollo\_new - Homozygous InDel  
SL2.40ch10

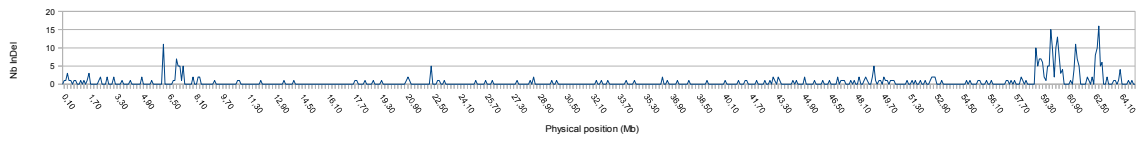

Ferum\_new - Homozygous InDel  
SL2.40ch10

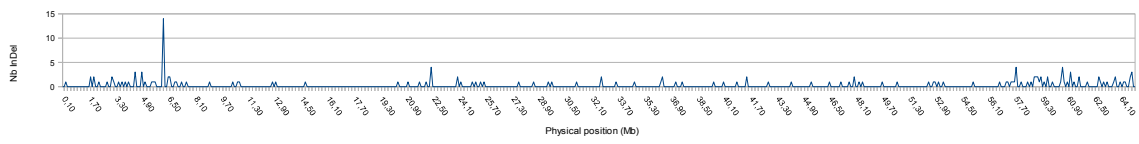

LA0147 - Homozygous InDel  
SL2.40ch10

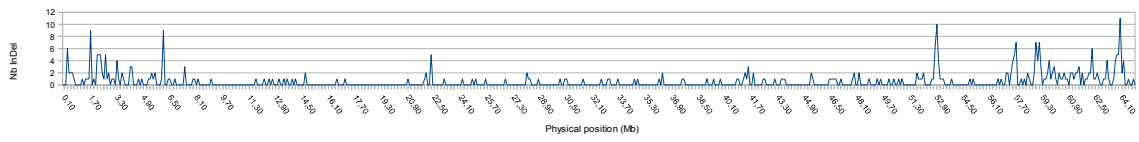

LA1420 - Homozygous InDel  
SL2.40ch10

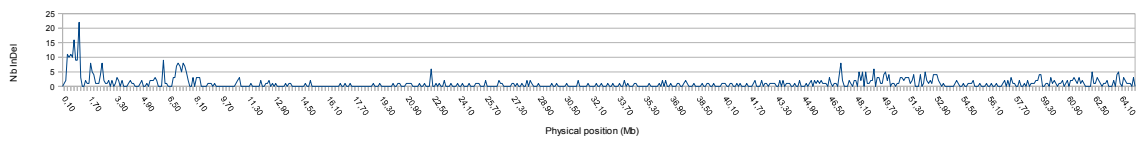

Levovil - Homozygous InDel  
SL2.40ch10

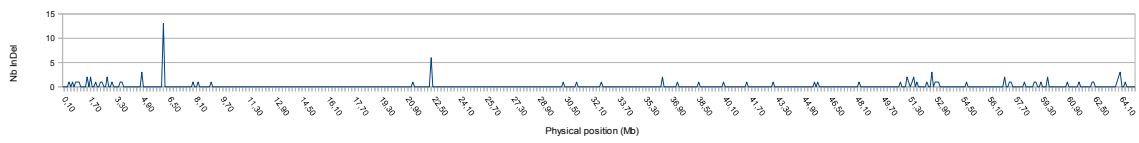

Plovdiv - Homozygous InDel  
SL2.40ch10

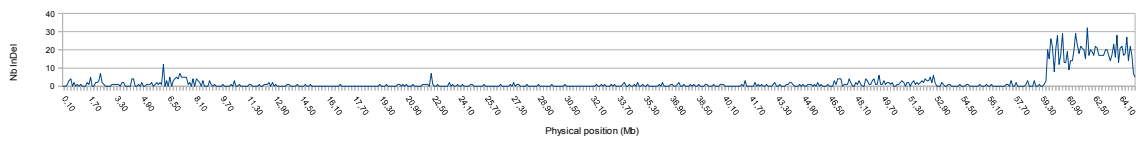

Stupicte - Homozygous InDel  
SL2.40ch10

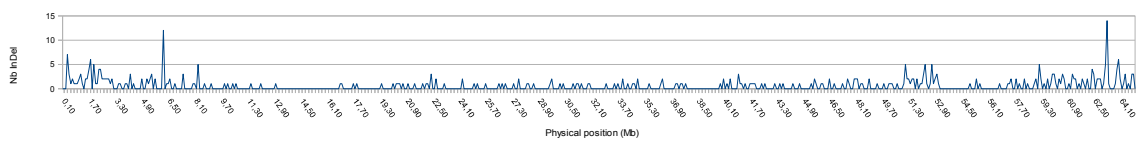

Cervil - Homozygous SNP

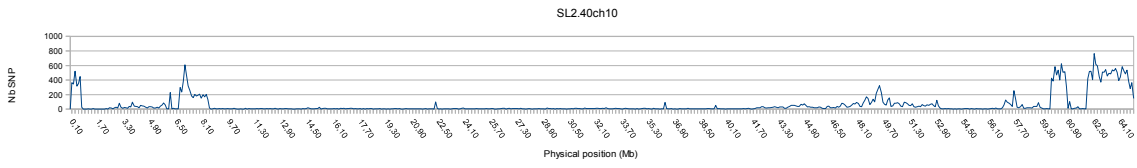

Criollo\_new - Homozygous SNP

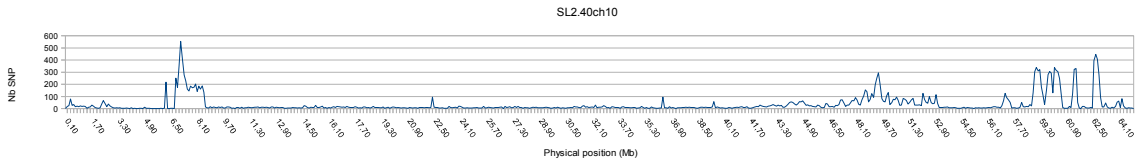

Ferum\_new - Homozygous SNP

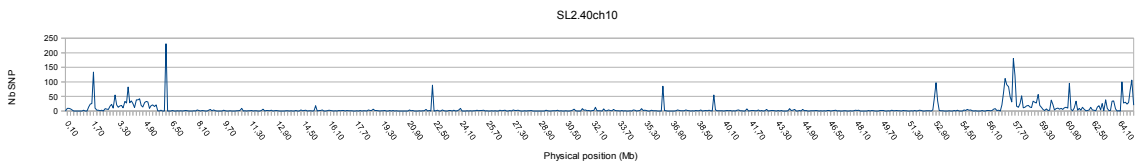

LA0147 - Homozygous SNP

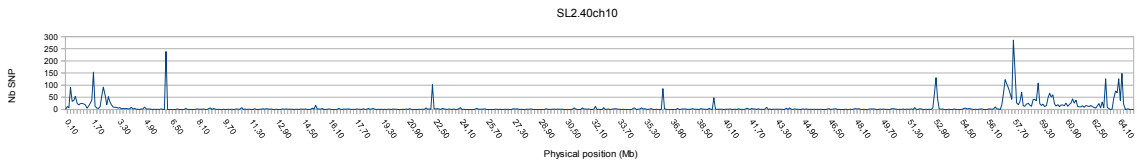

LA1420 - Homozygous SNP

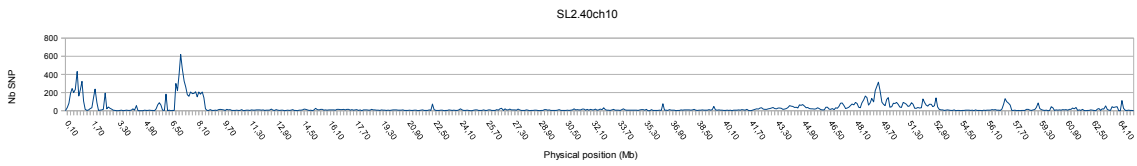

Levovil - Homozygous SNP

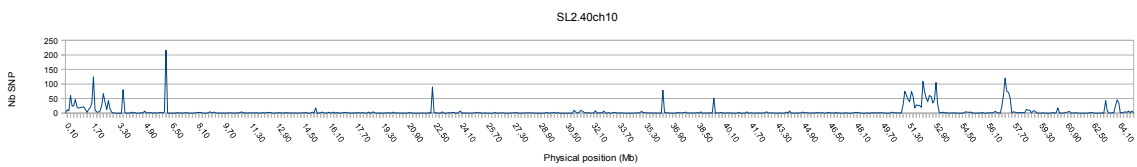

Plovdiv - Homozygous SNP

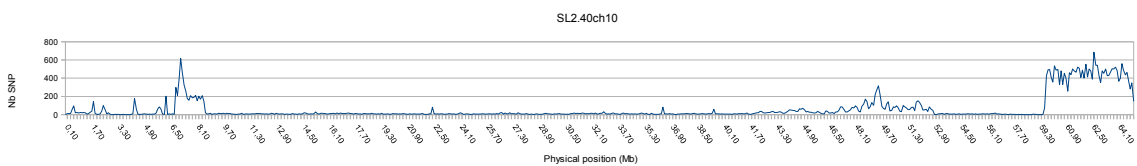

Stupicke - Homozygous SNP

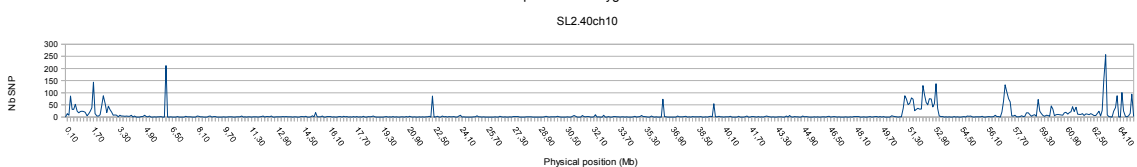

SNP hitz

Cervil - Heterozygous SNP

SL2.40ch10

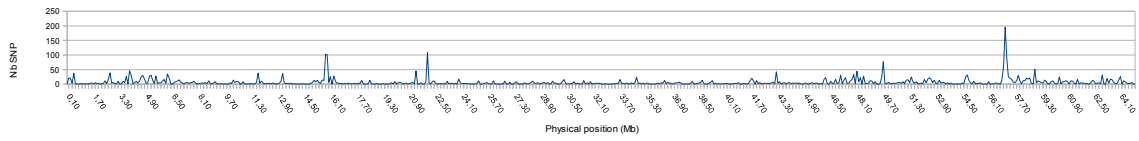

Criollo\_new - Heterozygous SNP

SL2.40ch10

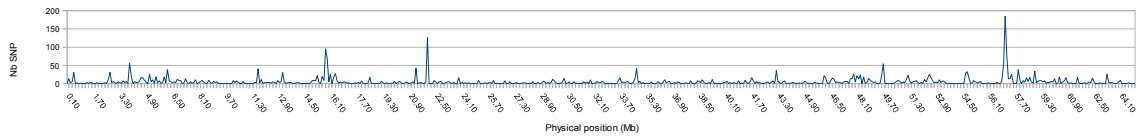

Ferum\_new - Heterozygous SNP

SL2.40ch10

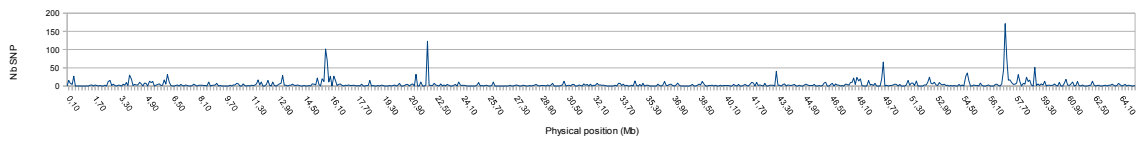

LA0147 - Heterozygous SNP

SL2.40ch10

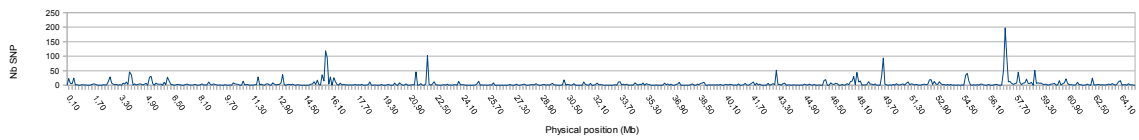

LA1420 - Heterozygous SNP

SL2.40ch10

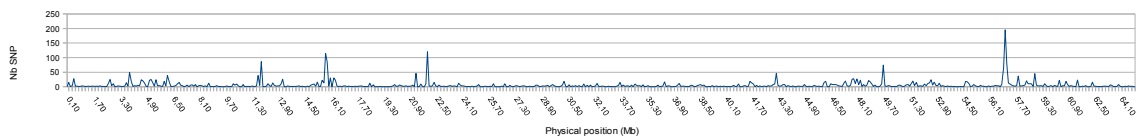

Levovil - Heterozygous SNP

SL2.40ch10

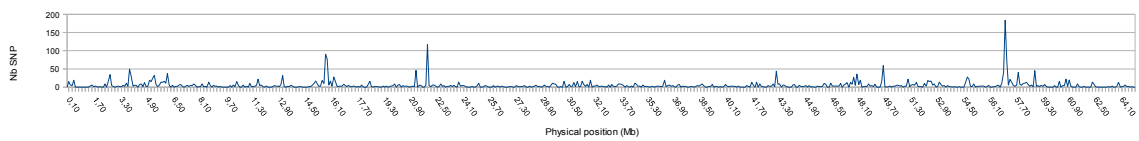

Plovdiv - Heterozygous SNP

SL2.40ch10

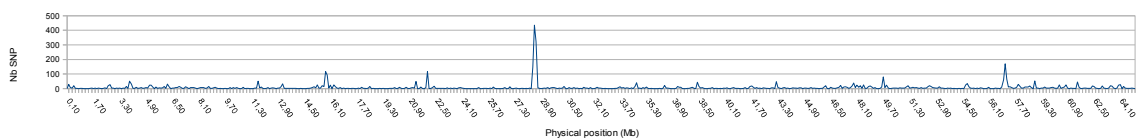

Stupicte - Heterozygous SNP

SL2.40ch10

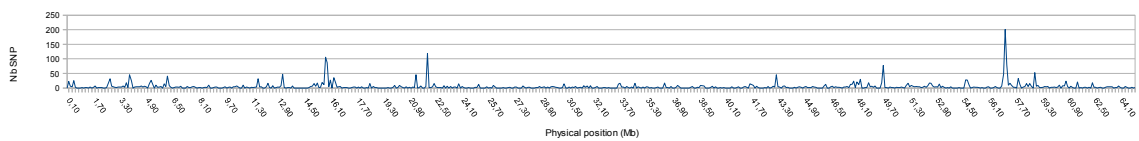



All\_100kb

Genes

SL2.40ch11

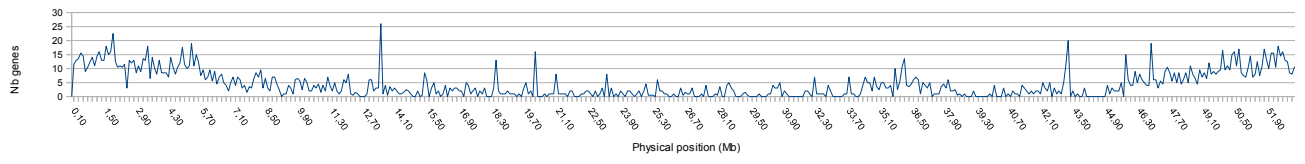

Homozygous SNP

SL2.40ch11

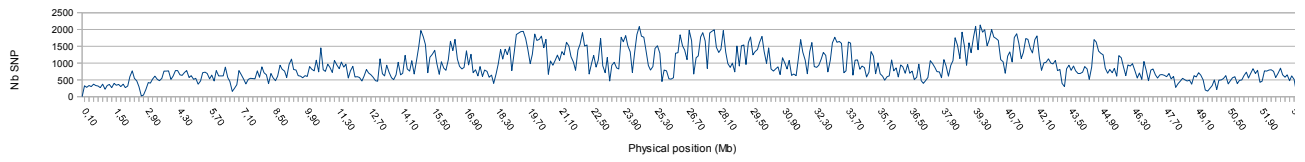

Heterozygous SNP

SL2.40ch11

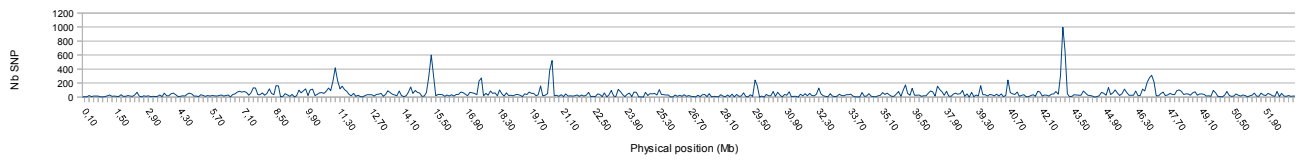

Homozygous InDel

SL2.40ch11

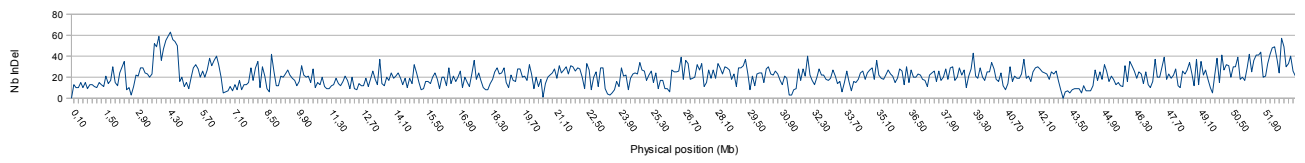

InDel hmz

Cervil - Homozygous InDel

SL2.40ch11

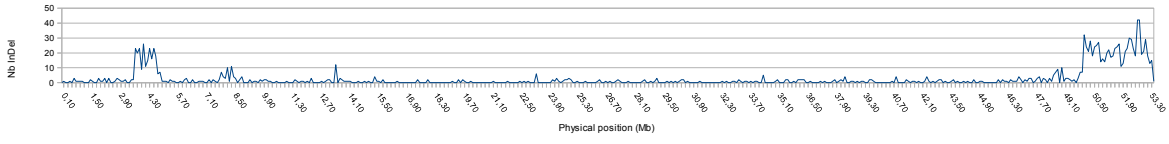

Criollo\_new - Homozygous InDel

SL2.40ch11

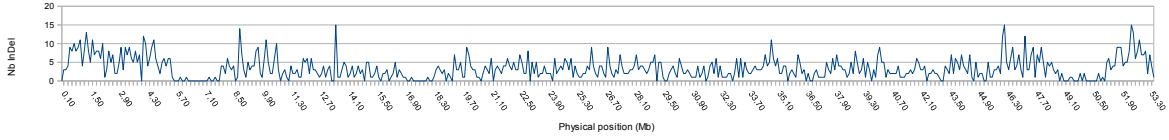

Ferum\_new - Homozygous InDel

SL2.40ch11

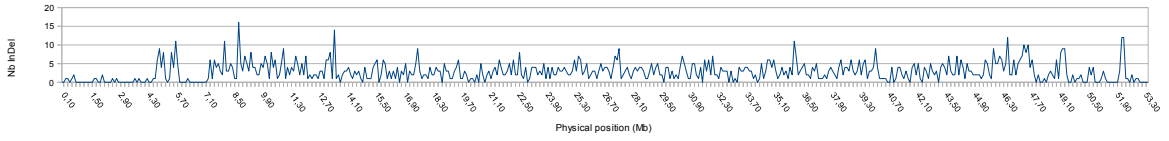

LA0147 - Homozygous InDel

SL2.40ch11

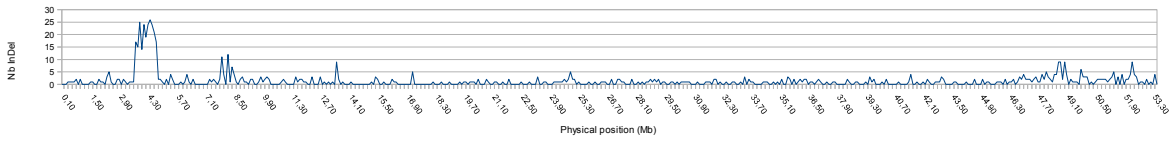

LA1420 - Homozygous InDel

SL2.40ch11

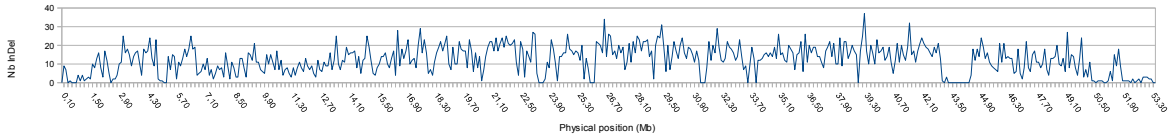

Levovl - Homozygous InDel

SL2.40ch11

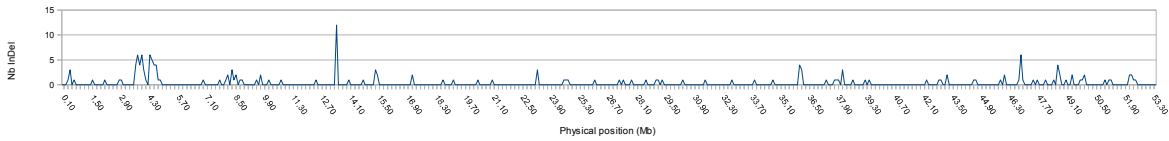

Plovdiv - Homozygous InDel

SL2.40ch11

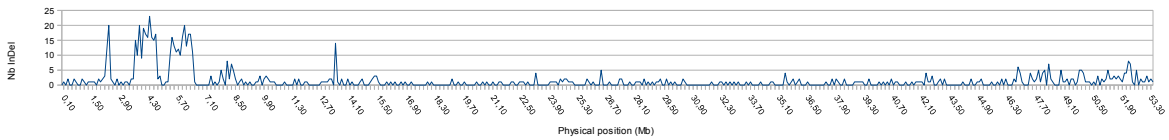

Stupicte - Homozygous InDel

SL2.40ch11

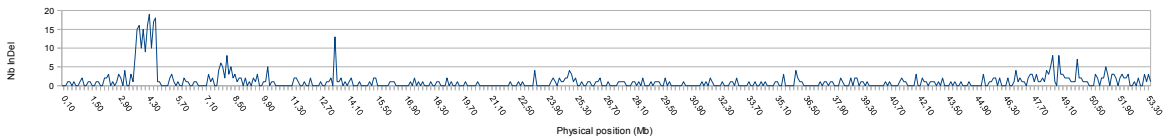

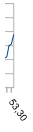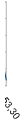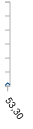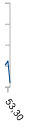

SNP hnz

Cervil - Homozygous SNP

SL2.40ch11

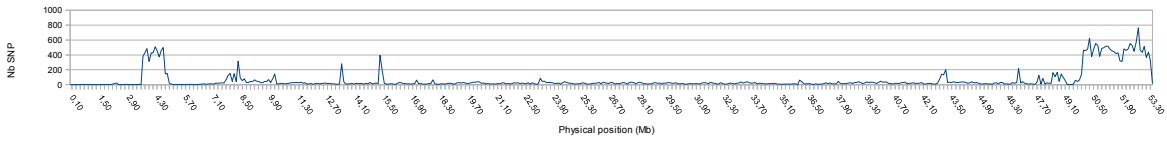

Criollo\_new - Homozygous SNP

SL2.40ch11

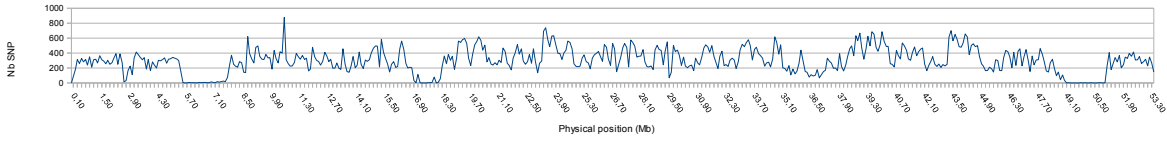

Ferum\_new - Homozygous SNP

SL2.40ch11

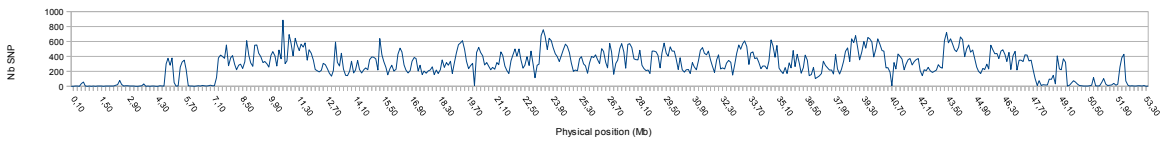

LA0147 - Homozygous SNP

SL2.40ch11

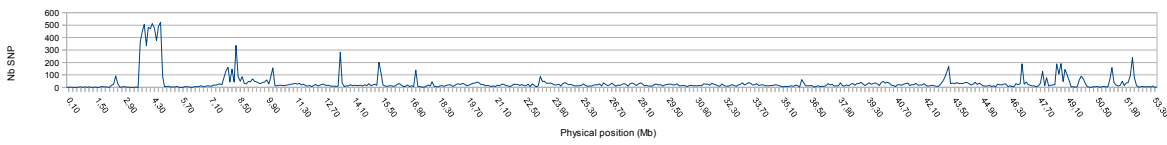

LA1420 - Homozygous SNP

SL2.40ch11

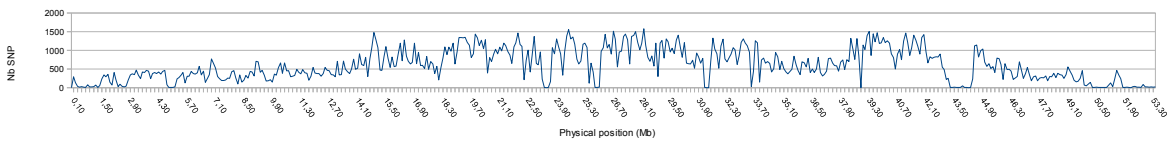

Levovil - Homozygous SNP

SL2.40ch11

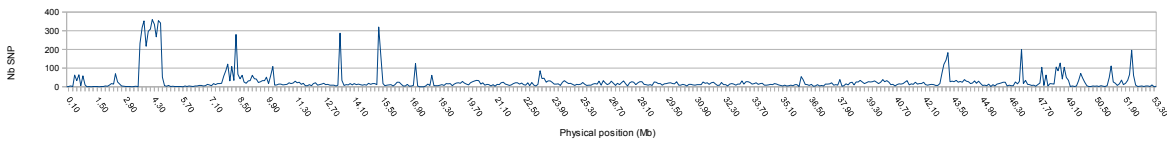

Plovdiv - Homozygous SNP

SL2.40ch11

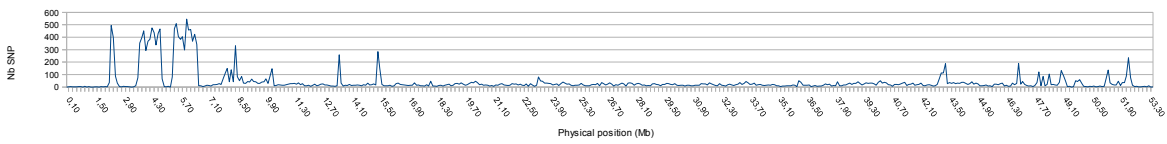

Stupicke - Homozygous SNP

SL2.40ch11

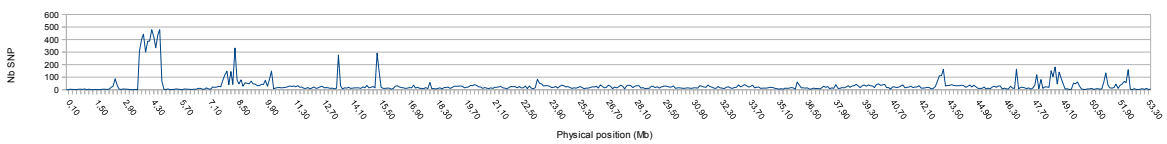

SNP htz

Cervi - Heterozygous SNP

SL2.40ch11

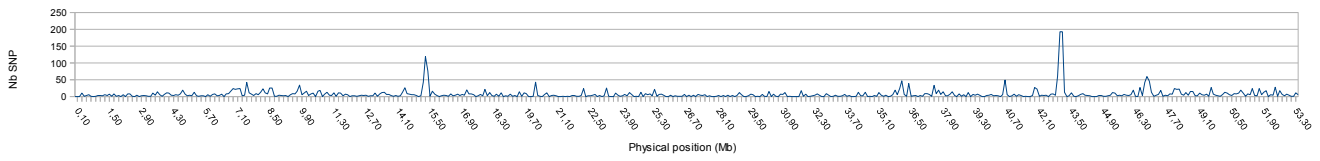

Criollo\_new - Heterozygous SNP

SL2.40ch11

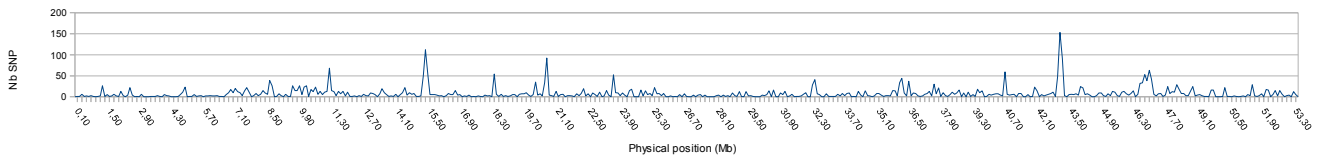

Ferum\_new - Heterozygous SNP

SL2.40ch11

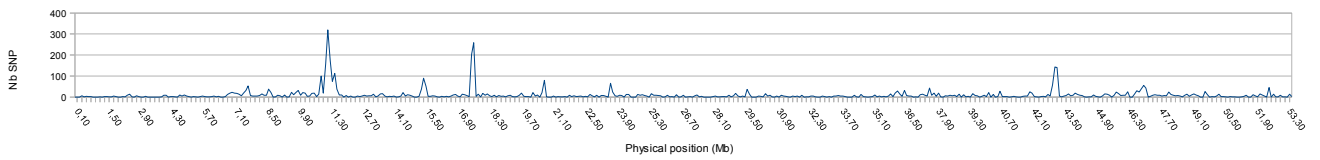

LA0147 - Heterozygous SNP

SL2.40ch11

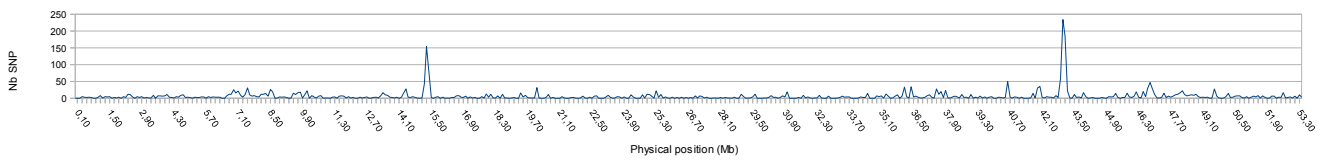

LA1420 - Heterozygous SNP

SL2.40ch11

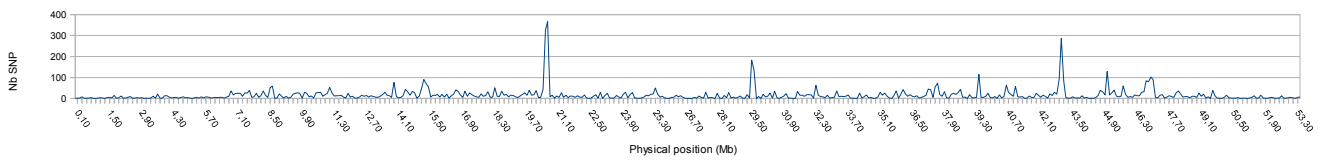

Levovil - Heterozygous SNP

SL2.40ch11

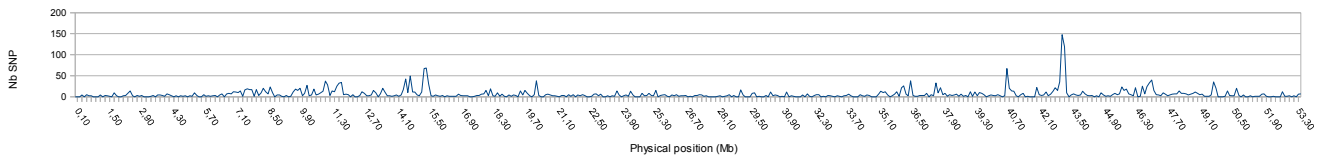

Plovdiv - Heterozygous SNP

SL2.40ch11

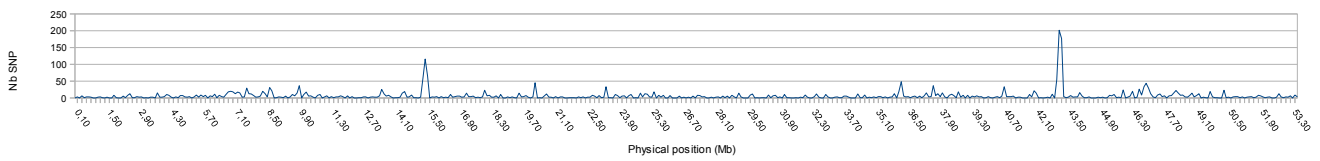

Stupicke - Heterozygous SNP

SNP htz  
SL2.40ch11

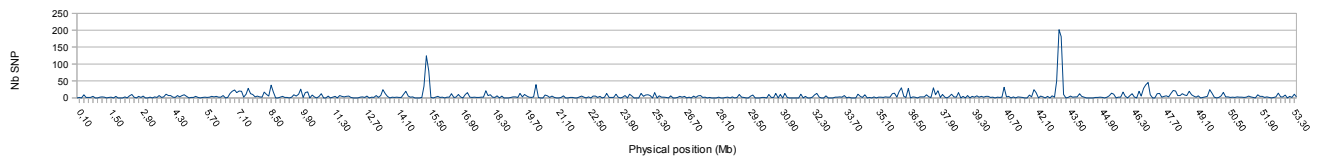

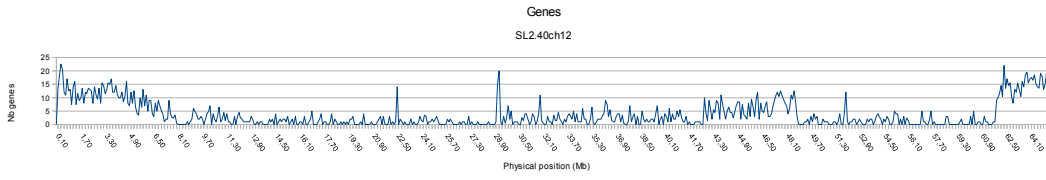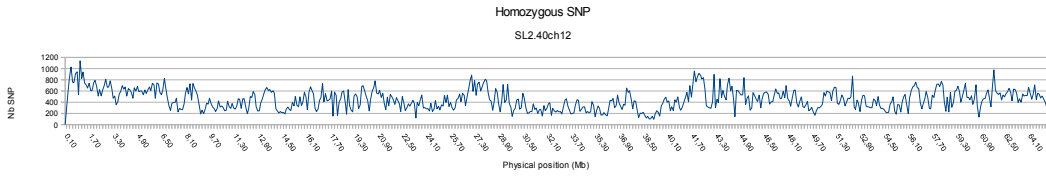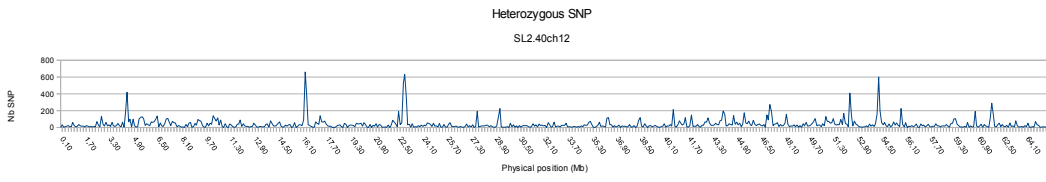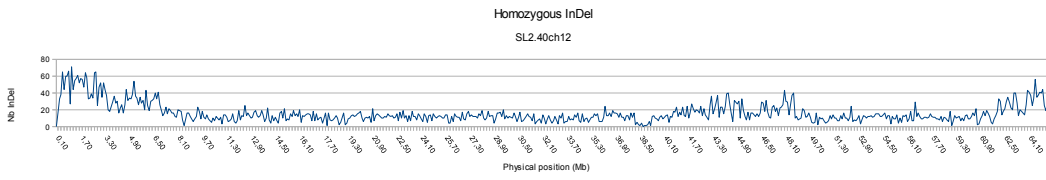

InDel hnz

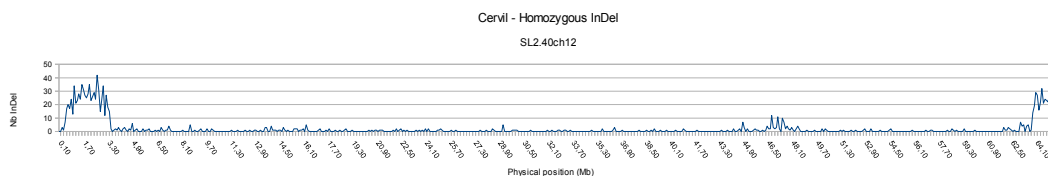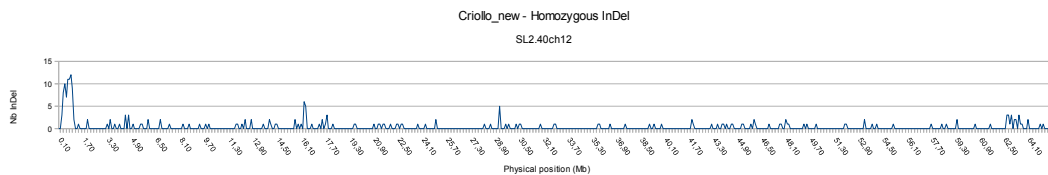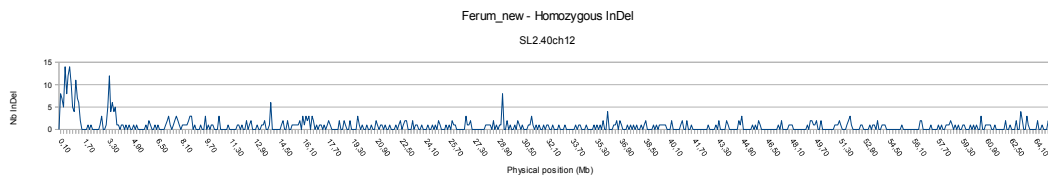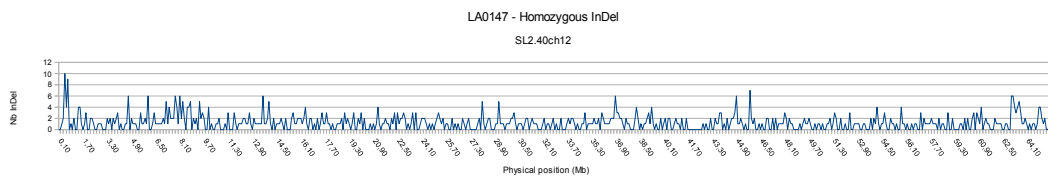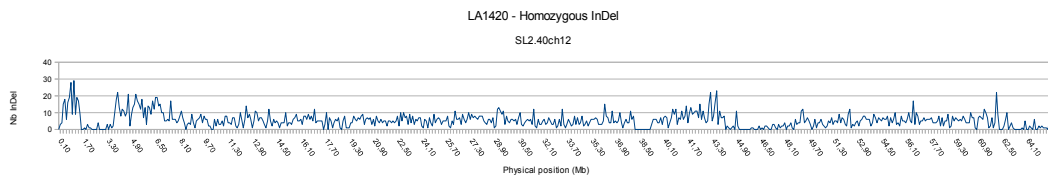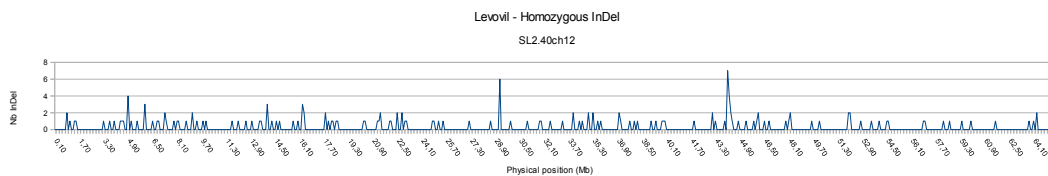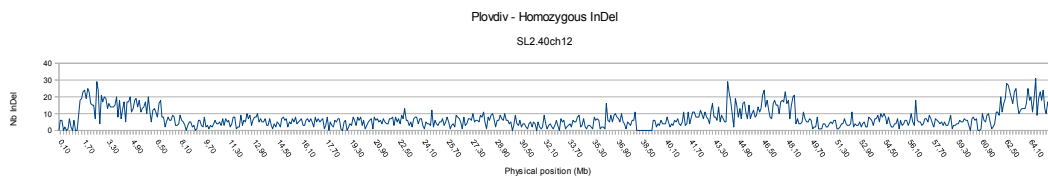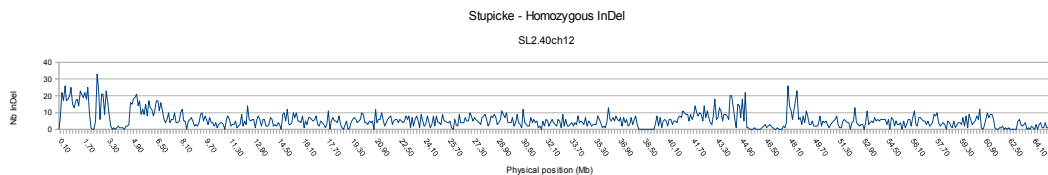



SNP hmz

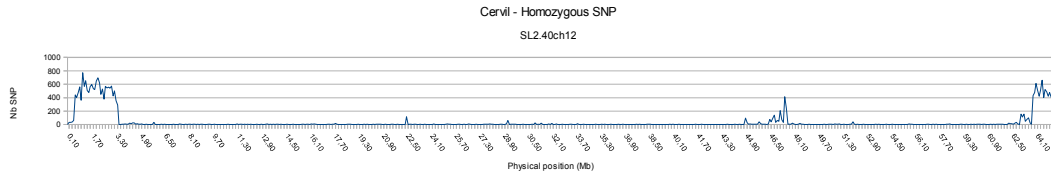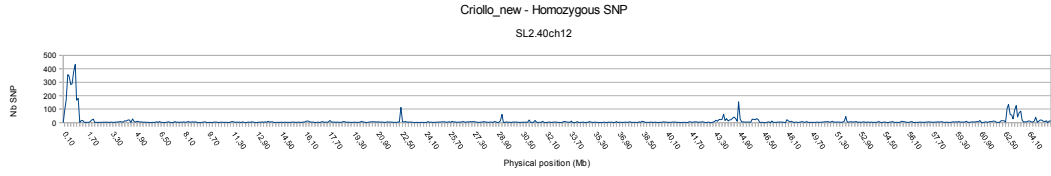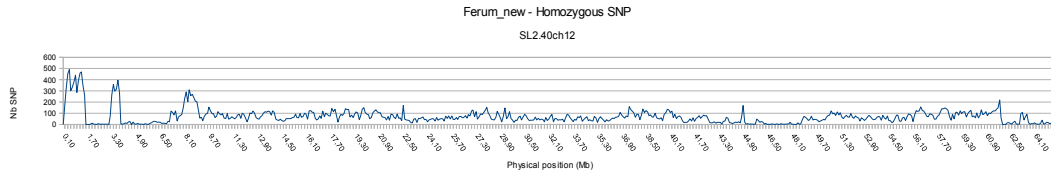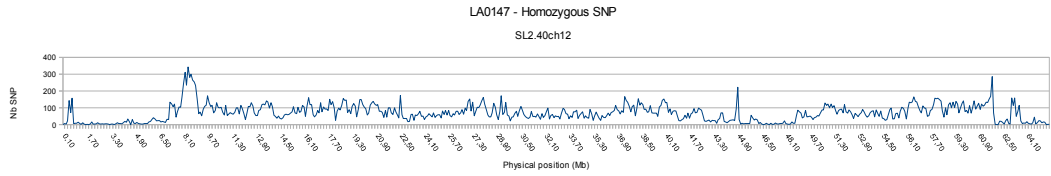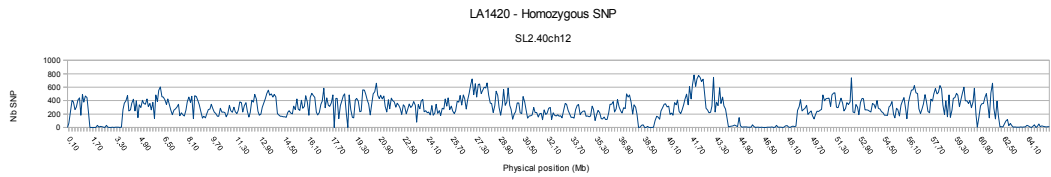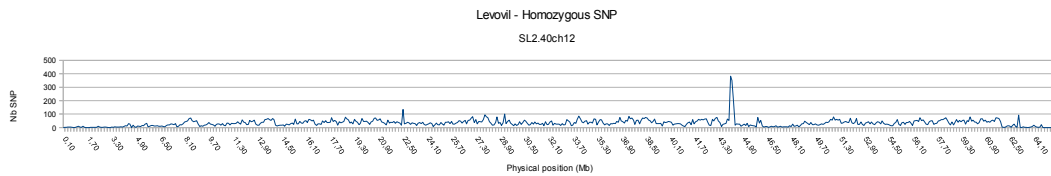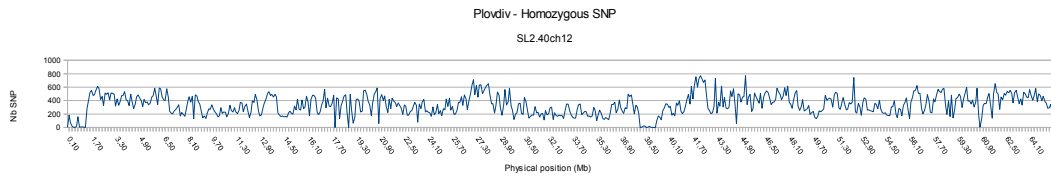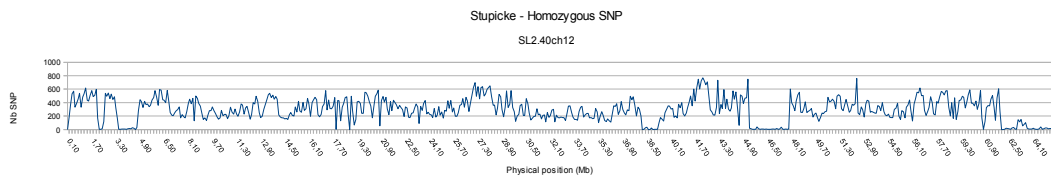

SNP Hz

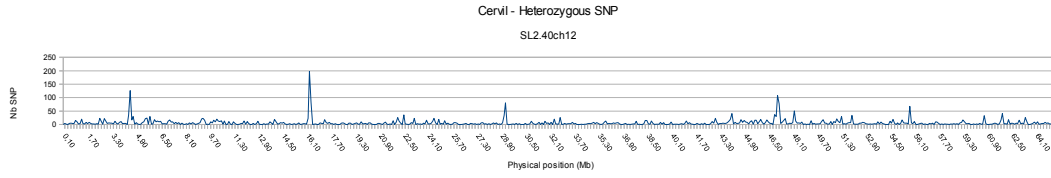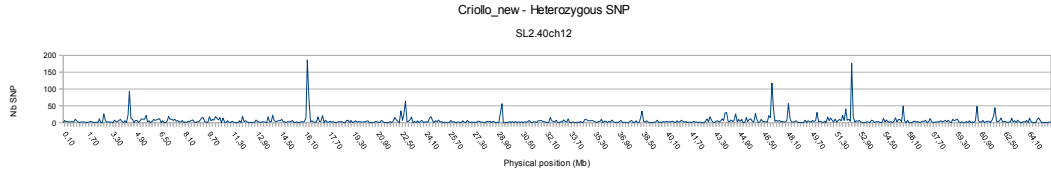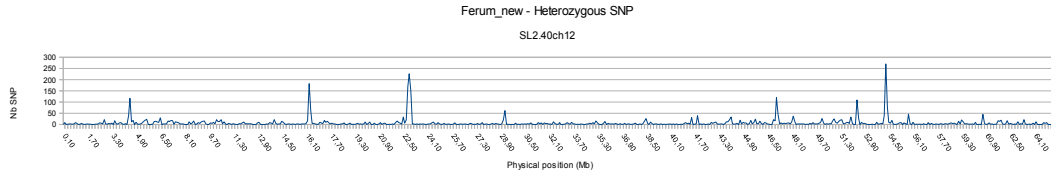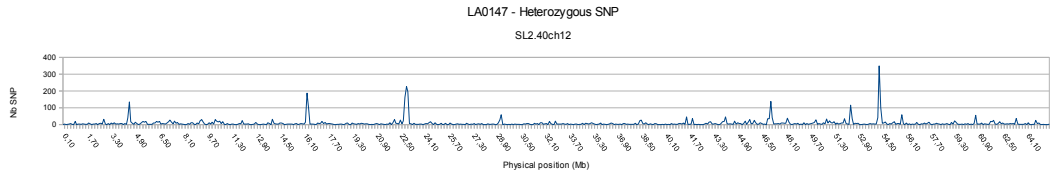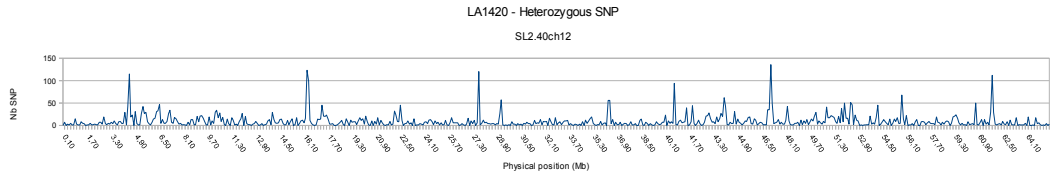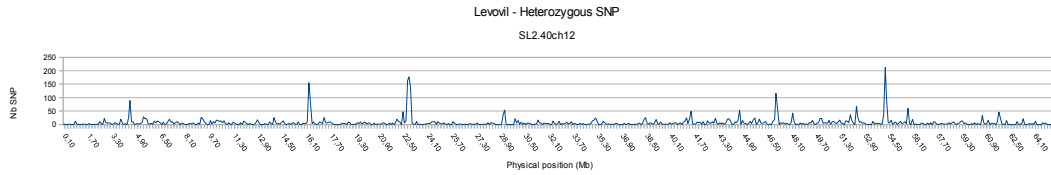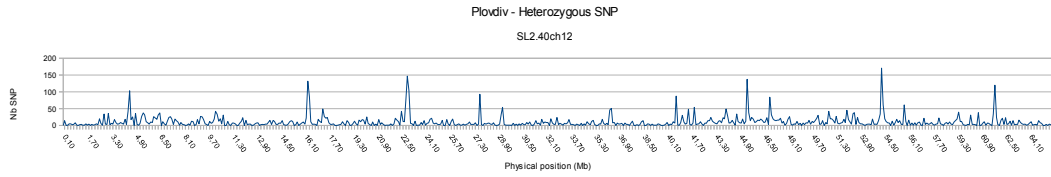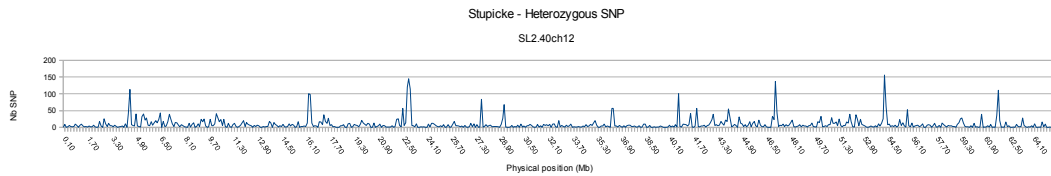

Supplement: 12864_2013_5531_MOESM2_ESM.pdf [file 12864_2013_5531_MOESM2_ESM.pdf]
