# Supplementary material for: Whole genome resequencing in tomato reveals variation associated with introgression and breeding events
Source: PubMed Central journal article supplement (PMC4046683; doi:10.1186/1471-2164-14-791), 2013-11-14

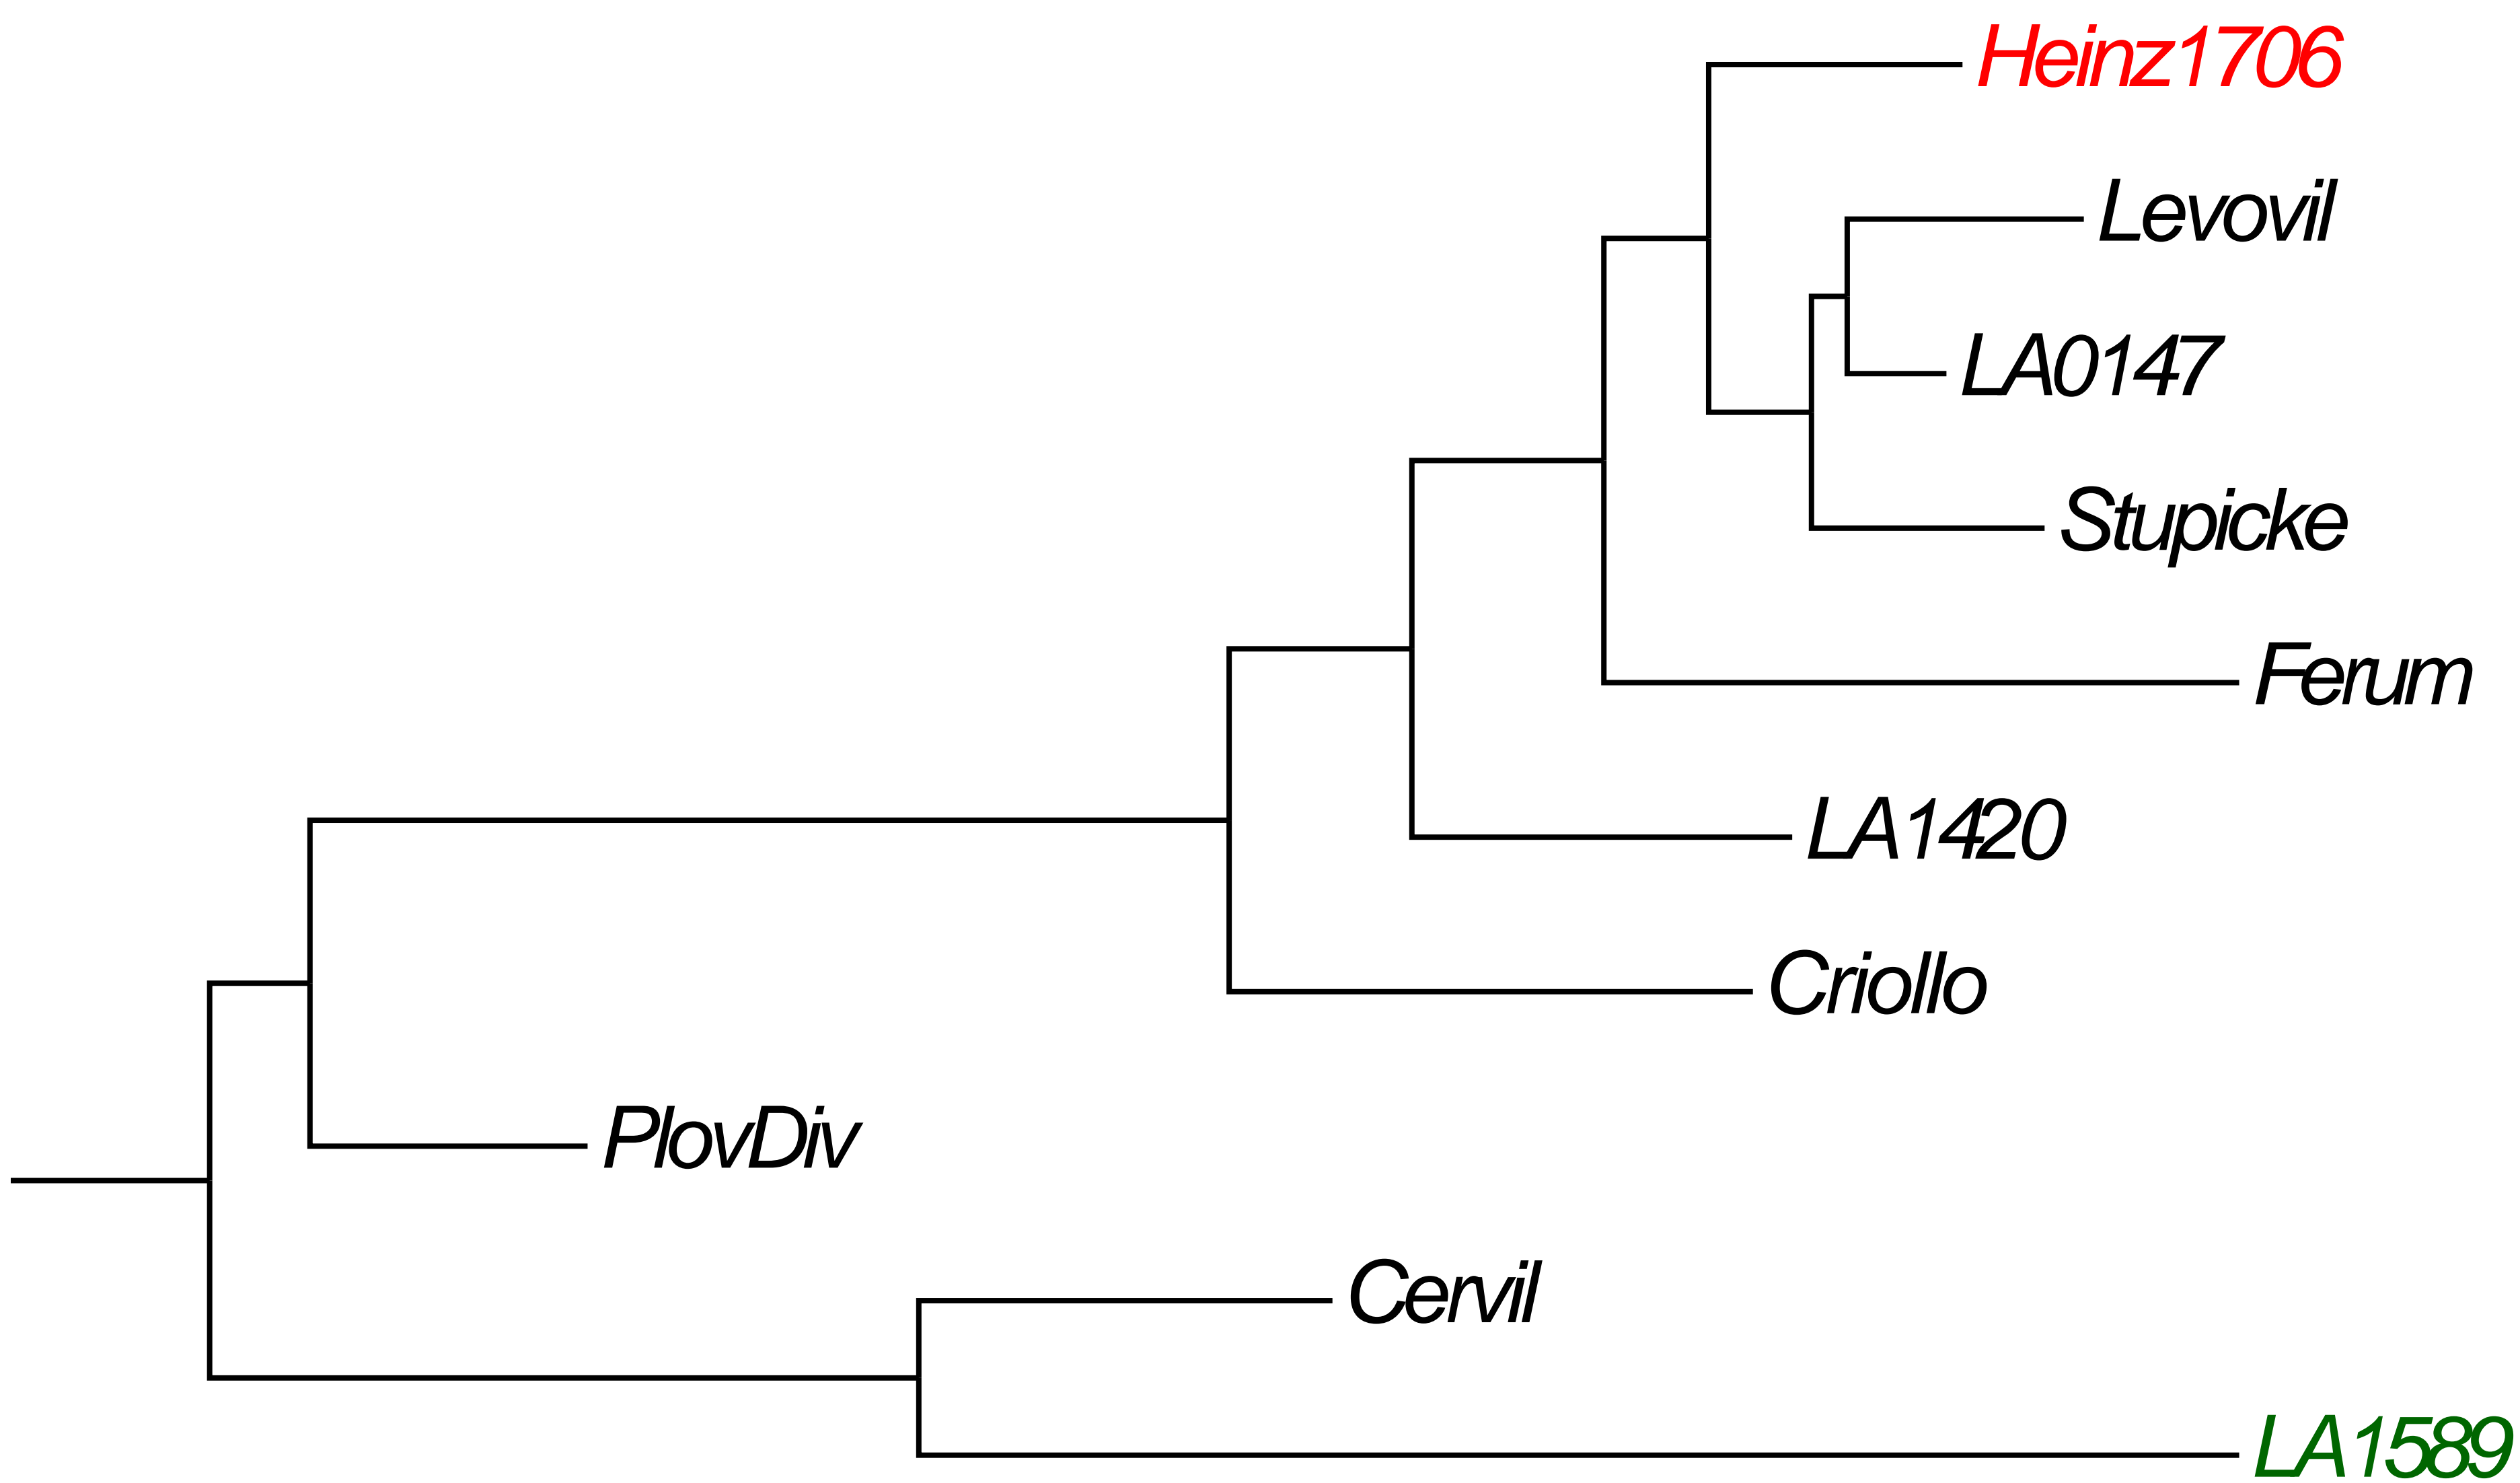

Supplement: 12864_2013_5531_MOESM8_ESM.pdf [file 12864_2013_5531_MOESM8_ESM.pdf]
